1  
2  
3  
4  
5  
6  
7  
8  
9  
10  
11  
12  
13  
14  
15  
16  
17

## Rad52 mediates class-switch DNA recombination to IgD

18  
19  
20  
21  
22  
23  
24  
25  
26  
27  
28

Yijiang Xu<sup>1,4</sup>, Hang Zhou<sup>1,4</sup>, Ginell Post<sup>2</sup>, Hong Zan<sup>1</sup> and Paolo Casali<sup>1,3</sup>✉

---

29 <sup>1</sup>Department of Microbiology, Immunology & Molecular Genetics, University of Texas Long School of Medicine,  
30 <sup>2</sup>Department of Pathology, University of Arkansas School of Medicine, Little Rock, AR 72205, USA.  
31 <sup>3</sup>Department of Medicine, University of Texas Long School of Medicine, UT Health Science Center, San Antonio,  
32 TX 78229, USA. <sup>4</sup>These authors contributed equally: Yijiang Xu and Hang Zhou. ✉e-mail: [pcasali@uthscsa.edu](mailto:pcasali@uthscsa.edu)

33 While the biology of IgD begins to be better understood, the mechanism of expression of this phylogenetically  
34 old and highly conserved Ig remains unknown. In B cells, IgD is expressed together with IgM as  
35 transmembrane receptor for antigen through alternative splicing of long primary  $V_HDJ_H-C\mu-s-m-C\delta-s-m$  RNAs,  
36 which also underpin secreted (s)IgD. IgD is also expressed through class switch DNA recombination (CSR), as  
37 initiated by AID-mediated double-strand DNA breaks (DSBs) in  $S\mu$  and  $\sigma\delta$ , and resolution of such DSBs by a  
38 still unknown mechanism. This synapses  $S\mu$  with  $\sigma\delta$  region DSB resected ends leading to insertion of extensive  
39 S-S junction microhomologies, unlike Ku70/Ku86-dependent NHEJ which resolves DSB blunt ends in CSR to  
40 IgG, IgA and IgE with little or no microhomologies. Our previous demonstration of a novel role of Rad52 in a  
41 Ku70/Ku86-independent “short-range” microhomology-mediated synopsis of intra- $S\mu$  region DSBs led us to  
42 hypothesize that this homologous recombination DNA annealing factor is also involved in short-range  
43 microhomology-mediated alternative endjoining (A-EJ) recombination of  $S\mu$  with  $\sigma\delta$ . We found that induction  
44 of IgD CSR by selected stimuli downregulated Zfp318 (the suppressor of  $C\mu-s-m$  transcription termination),  
45 promoted Rad52 phosphorylation and Rad52 recruitment to  $S\mu$  and  $\sigma\delta$ , leading to  $S\mu$ - $\sigma\delta$  recombination with  
46 extensive microhomologies,  $V_HDJ_H-C\delta s$  transcription and sustained IgD secretion. Rad52 ablation in mouse  
47  $Rad52^{-/-}$  B cells aborted IgD CSR *in vitro* and *in vivo* and dampened the specific IgD antibody response to OVA.  
48 Further, Rad52 knockdown in human B cells virtually abrogated IgD CSR. Finally, Rad52 phosphorylation was  
49 associated with high levels of IgD CSR and anti-nuclear IgD autoantibodies in lupus-prone mice and lupus  
50 patients. Thus, Rad52 effects CSR to IgD through microhomology-mediated A-EJ and in concert with Zfp318  
51 modulation. This is a previously unrecognized, critical and dedicated role of Rad52 in mammalian DNA repair  
52 that provides a mechanistic underpinning to CSR A-EJ.

53 IgD has been an enigmatic antibody class for many years, despite being evolutionarily ancient and highly  
54 conserved across species<sup>1-6</sup>. As primordial as IgM, IgD appeared in cartilaginous fishes, amphibians and occurs  
55 in fishes, rodents, cattle and humans<sup>2,7</sup>. As an example, in *Xenopus*, the Ig $\delta$  exon cluster is in the same position,  
56 immediately 3' of the Ig $\mu$  locus, as it exists in mammals<sup>7</sup>. In mice and humans, IgD is expressed primarily as a  
57 transmembrane IgD receptor together with IgM with identical antigen specificity on naïve mature B cells in the  
58 form of BCR. IgD also exists as a secreted antibody. In humans, circulating IgD occurs at concentrations up to  
59 more than two-thousand folds greater than IgE (10-250  $\mu\text{g/ml}$  vs.  $\sim 0.1$   $\mu\text{g/ml}$ ), the rarest peripheral blood Ig class.  
60 IgD are secreted by IgM<sup>-</sup>IgD<sup>+</sup> plasmablasts and plasma cells differentiated from B cells in lymphoepithelial organs  
61 in aerodigestive mucosae, including palatine and pharyngeal tonsils. IgM<sup>-</sup>IgD<sup>+</sup> B cells and plasma cells can also  
62 be found in the lachrymal, salivary and mammary glands<sup>3</sup>. In addition to existing as free molecule, IgD can occur  
63 on the surface of innate effector cells, including basophils, mast cells and monocytes<sup>1,8,9</sup>. IgD bound to these cells  
64 would enhance immune surveillance and exert proinflammatory and antimicrobial effects<sup>1,8,9</sup>. These include  
65 triggering basophils to secrete IL-4, IL-5 and IL-13 upon antigen engagement or attenuating basophil or mast cell  
66 allergic degranulation induced by IgE co-engagement<sup>1</sup>. Thus, IgD would contribute to mucosal homeostasis by  
67 endowing effector cells with reactivity to microbial commensals and pathogens<sup>5,6</sup>.

68 Identifying the stimuli and molecular mechanisms that underpin IgD expression is important to understand  
69 the regulation of IgD secretion throughout the body. The immediately proximal location and unique integration  
70 of C $\delta$  and C $\mu$  gene loci in the same transcriptional unit allow these two Ig isotypes to be coordinately regulated in  
71 transcription<sup>10,11</sup>. In naïve mature B cells, (membrane) mIgM and mIgD are co-expressed by alternative splicing  
72 of long primary transcripts consisting of rearranged V<sub>H</sub>DJ<sub>H</sub> exons and downstream C $\mu$  and C $\delta$  exons (*V<sub>H</sub>DJ<sub>H</sub>-C $\mu$ -  
73 s-m-C $\delta$ -s-m*). Alternative splicing of the same long primary *V<sub>H</sub>DJ<sub>H</sub>-C $\mu$ -s-m-C $\delta$ -s-m* transcripts also leads to  
74 expression of (secreted) sIgM and sIgD<sup>2,8</sup>. Transcription of long primary *V<sub>H</sub>DJ<sub>H</sub>-C $\mu$ -s-m-C $\delta$ -s-m* RNA requires  
75 the zinc finger ZFP318 repressor of transcriptional termination, which obliterates the effect of the transcriptional  
76 termination sites (TTS) intercalated between the C $\mu$  and C $\delta$  exon clusters<sup>10,11</sup> (Fig. 1a). IgD can also be expressed  
77 through class switch DNA recombination (CSR), by which IgM<sup>+</sup>IgD<sup>+</sup>B cells juxtapose *V<sub>H</sub>DJ<sub>H</sub>* DNA from the C $\mu$   
78 (IgM) to the C $\delta$  (IgD) exons cluster, giving rise to *V<sub>H</sub>DJ<sub>H</sub>-C $\delta$ m* RNA transcripts and IgM<sup>-</sup>IgD<sup>+</sup>B cells<sup>1,5,8,9,12</sup> (Fig.  
79 1b). In human and mouse nasopharyngeal and intestinal lymphoid tissues, a significant proportion of mucosal B  
80 cells class-switch to IgM<sup>-</sup>IgD<sup>+</sup>B cells, which subsequently differentiate to plasmablasts and plasma cells<sup>1,3,5,6</sup>.  
81 Generally, CSR to IgD (C $\delta$ ) is a less frequent event than CSR to IgG (C $\gamma$ ), IgA (C $\alpha$ ) or IgE (C $\epsilon$ ), perhaps a  
82 reflection among other factors of the peculiar structure of the pseudo-switch  $\sigma\delta$  region lying immediately upstream  
83 of C $\delta$  exons. Compared to the canonical S $\mu$ , S $\gamma$ , S $\alpha$  and S $\epsilon$  regions lying 5' of the respective Ig $\mu$ , Ig $\gamma$ , Ig $\alpha$  and  
84 Ig $\epsilon$  loci,  $\sigma\delta$  is shorter and contain differing motifs of nucleotide (nt) repeats<sup>2,5,8,13,14</sup>. These would provide an  
85 unconventional substrate for AID-mediated insertion of DSBs, possibly more prone to end-resection and  
86 generation of single-strand overhangs for S $\mu$ - $\sigma\delta$  recombination, which leads to expression of post-recombination  
87 *V<sub>H</sub>DJ<sub>H</sub>-C $\delta$*  RNA transcripts<sup>2,8,13-15</sup>.

88 Unlike CSR to IgG, IgA and IgE, the mechanism of CSR to IgD remains unknown. Recombination involving  
89 S $\mu$  DSB ends with DSB ends in downstream S $\mu$ , S $\gamma$ , S $\alpha$  or S $\epsilon$  region is effected by non-homologous end-joining

90 (NHEJ), one of the two major DNA DSB repair pathways, the other being homologous recombination (HR)<sup>16,17</sup>.  
91 HR accurately repairs resected (staggered) DSB ends using a sister chromatid as a homologous single-strand  
92 template during cell cycle S-G2. It critically effects error-free DSB repair in somatic cells and helps orchestrate  
93 chromosome segregation in meiosis. In contrast to HR, NHEJ is a homology-independent error-prone process. It  
94 synapses blunt or virtually blunt DSB ends that lack substantial joining complementarity to form “direct” junctions,  
95 predominantly in G1 but also throughout the whole cell cycle<sup>16</sup>. NHEJ requires Ku70/Ku86 and in CSR mediates  
96 efficient long-range synapses of S $\mu$  DSB ends with S $\gamma$ , S $\alpha$  and S $\epsilon$  DSB ends, leading to IgG, IgA and IgE<sup>15</sup>. The  
97 finding, however, that reduction or deletion of Ku70/Ku86 led to reduced but still substantial CSR to IgG1 and  
98 IgG3 supported the existence of an alternative CSR end-joining (A-EJ) pathway<sup>18-20</sup>. This, like HR, would join  
99 resected DSB ends, thereby giving rise to S-S junctions with microhomologies. Unlike HR, however, the A-EJ  
100 pathway juxtaposes DSB overhangs to be joined without using a homologous template as a guide. Rather, it  
101 utilizes differing extents of sequence complementarity (homology) between the upstream and downstream  
102 resected DSB overhangs to align the to-be DNA junctions<sup>21</sup>. As we have shown, HR factor Rad52 competes with  
103 Ku70/Ku86 for binding to S region DSB ends and synapses DSB ends by A-EJ through microhomology-mediated  
104 end-joining (MMEJ)<sup>20</sup>, as inferred from increased NHEJ-mediated IgG, IgA and IgE CSR events with even fewer  
105 S-S junction microhomologies in *Rad52*<sup>-/-</sup> B cells *in vivo* and *in vitro*<sup>20</sup>. This together with the increased CSR to  
106 IgD in B cells lacking 53BP1, which protects S regions DSB ends from resection and facilitates long-range NHEJ  
107 to IgG, IgA and IgE<sup>22-24</sup>, as well as other findings of ours showing reduced intra-S $\mu$  DSB short-range rejoining in  
108 *Rad52*<sup>-/-</sup> B cells<sup>20</sup> led us to hypothesize that by annealing<sup>20</sup> to single-strand resected DSB ends, Rad52 mediates  
109 CSR to IgD through A-EJ involving short-range S $\mu$ - $\sigma\delta$  DSB recombination.

110 To test the hypothesis that Rad52 synapses S $\mu$  with  $\sigma\delta$  DSB ends for IgD CSR, we first set up to define the  
111 stimuli that consistently induce CSR to IgD in mouse and human B cells. We then used such stimuli in mouse  
112 *Rad52*<sup>-/-</sup> B cells and *RAD52* siRNA knockdown human B cells together with molecular genetic methods to  
113 determine the impact of Rad52 deficiency as well as Rad52 phosphorylation on S $\mu$ - $\sigma\delta$  DNA recombination and  
114 IgD expression. We validated our findings by analyzing specific IgD antibody and total IgD titers in mouse blood,  
115 lungs and gut, as well as recombined S $\mu$ - $\sigma\delta$  DNA sequences in mouse spleen, mesenteric lymph nodes (MLNs)  
116 and Peyer’s patches as well as human tonsil B cells. We adapted chromatin immunoprecipitation (ChIP) assays  
117 to analyze the recruitment of Rad52/RAD52 to the  $\sigma\delta$  region in mouse and human B cells induced to undergo  
118 CSR to IgD, in which we also analyzed regulation of *V<sub>H</sub>DJ<sub>H</sub>-C $\delta$*  transcription. We found that different stimuli  
119 induced IgD expression by alternative splicing of long *V<sub>H</sub>DJ<sub>H</sub>-C $\mu$ -s-m-C $\delta$ -s-m* RNA transcripts or by S $\mu$ - $\sigma\delta$  CSR.  
120 Further, we determined the expression of IgD by CSR to be related to Zfp318-mediated repression of the TTS  
121 integrated in C $\mu$ -C $\delta$  loci. We also correlated S $\mu$ - $\sigma\delta$  CSR with IgD secretion and plasma cell differentiation.  
122 Finally, we analyzed B cell Rad52 phosphorylation in lupus patients and lupus-prone mice and correlated it with  
123 CSR to IgD involving extensive microhomologies and somatic mutations in S $\mu$ - $\sigma\delta$  junctional sequences, as well  
124 as the occurrence of high levels of anti-nuclear antigen IgD autoantibodies. Our findings show that Rad52  
125 mediates CSR to IgD through microhomology-mediated A-EJ and in concert with Zfp318 modulation. This is a  
126 previously unrecognized, critical and dedicated role of Rad52 in an essential DNA repair process in mammals.



127 **Results**

128 **Definition of stimuli that induce  $S\mu$ - $\sigma\delta$  CSR in mouse and human B cells.** Toward testing our hypothesis that  
129 Rad52 mediates CSR to IgD, we first determined the stimuli that induce  $IgM^+IgD^+$  B cells to undergo  $S\mu$ - $\sigma\delta$   
130 recombination. In these B cells, mIgD and sIgD and IgM are expressed by alternative splicing of long primary  
131  $V_HDJ_H-C\mu-s-m-C\delta-s-m$  mRNAs – the C $\delta$  locus is located immediately downstream of the C $\mu$  locus in the same  
132 transcriptional unit, allowing these two loci be coordinately regulated at the transcriptional level<sup>1,2,4,6</sup> (Fig. 1a).  
133 As CSR can be induced in a T-dependent or T-independent antibody fashion<sup>15,25</sup>, we used CD40 ligand CD154  
134 (for mouse and human B cells), TLR4 ligand LPS (mouse B cells) and TLR9 ligand CpG (human B cells) in  
135 conjunction with differing cytokines and/or BCR-cross-linking to induced CSR to IgD. Recombined  $S\mu$ - $\sigma\delta$ ,  $S\mu$ -  
136  $S\gamma1$ ,  $S\mu$ - $S\gamma3$ ,  $S\mu$ - $S\alpha$  and  $S\mu$ - $S\epsilon$  DNAs were detected by specific nested PCRs followed by positive identification  
137 of amplified DNA by blotting and hybridization with specific DNA probes (Fig. 1 inset), complemented by  
138 sequencing of the junctional  $S\mu$ - $\sigma\delta$  or  $S\mu$ - $S_X$  DNA. Of all stimuli used, only LPS or CD154 plus IL-4 induced  
139 CSR to IgD in mouse B cells (Fig. 2a), and only CpG plus IL-2 and IL-21, or CD154 plus IL-4 or IL-15 and IL-  
140 21 induced CSR to IgD in human B cells. IgD CSR was also detected *in vivo* in tonsil B cells (Fig. 2b). The  
141 effectiveness of the stimuli that did not induce CSR to IgD was verified by the respective induction of the expected  
142  $S\mu$ - $S\gamma1$ ,  $S\mu$ - $S\gamma3$ ,  $S\mu$ - $S\alpha$  or  $S\mu$ - $S\epsilon$  DNA recombination. (IgG1, IgG3, IgA or IgE) (Fig. 2a) – no CSR to IgD, IgG,  
143 IgA or IgE occurred in *Aicda*<sup>-/-</sup> B cells. In all cases, CSR was further confirmed by detection of post-  
144 recombination  $I\mu$ - $C\gamma1$ ,  $I\mu$ - $C\gamma3$ ,  $I\mu$ - $C\alpha$  and  $I\mu$ - $C\epsilon$  transcripts at 72 h of culture – as post-recombination  $I\mu$ -  
145 C $\delta$  transcripts are indistinguishable from germline  $I\mu$ -C $\delta$ s-m RNA transcripts and consistent with high levels of  
146 the latter in naïve B cells,  $I\mu$ -C $\delta$  amplification products were less abundant in class-switched IgD than naïve B  
147 cells (Figs. 1, 2c). Thus, only select stimuli induce CSR to IgD in mouse and human B cells.

148  **$S\mu$ - $\sigma\delta$  junctions are enriched in microhomologies and abetted by somatic mutations in mouse and human**  
149 **B cells.** The mechanisms effecting CSR S-S synapses can leave a S-S junctional signature<sup>20,26</sup>. As we previously  
150 showed, Rad52 mediates A-EJ of resected DSB ends by juxtaposing overhangs with nucleotide complementarities,  
151 thereby giving rise to  $S\mu$ - $S_X$  DNA junctions with microhomologies<sup>20</sup>. Next generation sequencing of more than  
152 100,000 recombined  $S\mu$ - $S_X$  DNA junctions from mouse and human B cells *in vitro* and/or *in vivo* showed that  
153  $S\mu$ - $\sigma\delta$  junctions contained significantly more microhomologies ( $p < 0.01$ ) than  $S\mu$ - $S\gamma1$  or  $S\mu$ - $S\alpha$  DNA junctions  
154 (representative frequencies and lengths of microhomologies in human and mouse B cells are depicted in Fig. 3a;  
155 representative human and mouse intra- $\sigma\delta$  and junctional  $S\mu$ - $S_X$  sequences are depicted in Fig. 4 and Extended  
156 Data Figs. 1,2), indicating that a MMEJ<sup>21</sup> synaptic process underpinned  $S\mu$ - $\sigma\delta$  junction formation. In both human  
157 and mouse B cells, the microhomologies in  $S\mu$ - $\sigma\delta$  junctions were significantly more extensive than those in  $S\mu$ -  
158  $S\gamma1$  and, to a lesser extent,  $S\mu$ - $S\alpha$  junctions (Fig. 4, Extended Data Figs. 1,2). As one example, in human tonsil  
159 B cells, 100% of analyzed  $S\mu$ - $\sigma\delta$  junctions contained microhomologies, consisting of 2 to 13 nucleotides (mean  
160 = 6.30), while only 21% of  $S\mu$ - $S\gamma1$  junctions contained microhomologies, consisting of 1 to 6 nucleotides (mean  
161 = 0.72) (Fig. 3a). Interestingly, there were a few common S-S sequences shared by recombined  $S\mu$ - $\sigma\delta$  DNA  
162 junctions in human tonsil B cells and blood naïve B cells stimulated *in vitro* by CpG plus IL-2 and IL-21,  
163 suggesting that  $S\mu$  and  $\sigma\delta$  DSB hotspots underpin  $S\mu$ - $\sigma\delta$  in DNA recombinations. A high frequency of

164 microhomologies was also evident in the synaptic repair process of intra- $\sigma\delta$  DSBs, evocative of what we showed  
165 in intra- $S\mu$  DSBs<sup>20</sup>. Consistent with the greatest occurrence of microhomologies in  $S\mu$ - $\sigma\delta$  junctions,  $S\mu$  is better  
166 suited for complementary DNA single-strand annealing with  $\sigma\delta$  than  $S\gamma 1$  or, to a lesser extent,  $S\alpha$  (mouse) or  $S\alpha 1$   
167 (human), based on various numbers and contexts of these DNA regions discrete motifs, such as  $[G_n]AGCT$  repeats  
168 ( $S\mu$ ,  $S\gamma$  and  $S\alpha$ ) or  $AGCTGAGCTG$  repeats ( $S\mu$  and  $\sigma\delta$ ), as revealed by Pustell Matrix dot-plot analysis (Fig. 3b).  
169 Finally,  $S\mu$ - $\sigma\delta$  DNA junctions were associated with somatic point-mutations. These were more frequent in the  
170  $\sigma\delta$  area than  $S\mu$  area abetting the  $S\mu$ - $\sigma\delta$  junction (e.g.,  $0.559 \times 10^{-2}$  vs.  $0.973 \times 10^{-2}$  change/base in mouse spleen  
171 B cells *in vivo* and  $1.251 \times 10^{-2}$  vs.  $1.985 \times 10^{-2}$  change/base in mouse B cells stimulated by LPS plus IL-4 *in*  
172 *vitro*) (Fig. 3c). Thus, the high frequency of microhomologies in  $S\mu$ - $\sigma\delta$  junctions supports a role of Rad52 in  
173 mediating CSR to IgD.

174 **Rad52 is critically required for  $S\mu$ - $\sigma\delta$  recombination.** Having established that LPS or CD154 plus IL-4 induced  
175 CSR to IgD in mouse B cells, we used these stimuli and *Rad52*<sup>-/-</sup> B cells together with appropriate controls (LPS  
176 alone, LPS plus TGF- $\beta$  and RA, CD154 or CD154 plus TGF- $\beta$  and RA) and the same approach used in the  
177 experiments of Fig. 2 to investigate whether or not Rad52 was required for CSR to IgD. LPS plus IL-4 and  
178 CD154 plus IL-4 failed to induce  $S\mu$ - $\sigma\delta$  recombination in *Rad52*<sup>-/-</sup> B cells, while either treatment efficiently  
179 induced  $S\mu$ - $S\gamma 1$  and  $S\mu$ - $S\epsilon$  recombinations in the same *Rad52*<sup>-/-</sup> B cells, and  $S\mu$ - $\sigma\delta$  recombination in *Rad52*<sup>+/+</sup> B  
180 cells (Fig. 5a) – in *Rad52*<sup>-/-</sup> B cells, LPS and LPS or CD154 plus TGF- $\beta$  and RA induced CSR to IgG3 and IgA,  
181 respectively. As expected, CSR to IgD as well as IgG, IgA and IgE was ablated in *Aicda*<sup>-/-</sup> B cells. Finally, the  
182 failure of *Rad52*<sup>-/-</sup> B cells to undergo CSR to IgD was associated with significantly decreased secretion of IgD  
183 (Fig. 5b). Thus, Rad52 is critical for  $S\mu$ - $\sigma\delta$  DNA recombination and seemingly important for IgD secretion.

184 **Rad52 is required to mount a specific IgD antibody response.** We determined the role of Rad52 in supporting  
185 a specific IgD antibody response by immunizing *Rad52*<sup>-/-</sup> and *Rad52*<sup>+/+</sup> mice with OVA (20  $\mu$ g in alum, i.p., 3  
186 times). *Rad52*<sup>-/-</sup> mice showed no  $S\mu$ - $\sigma\delta$  recombination in spleen, mesenteric lymph nodes (MLNs) or Peyer's  
187 patch B cells (Fig. 6a). The lack of CSR to IgD was specific, as B cells in such mice showed  $S\mu$ - $S\gamma 1$  and  $S\mu$ -  
188  $S\alpha$  DNA recombinations as B cells in *Rad52*<sup>+/+</sup> mice, which also underwent  $S\mu$ - $\sigma\delta$  recombination. In *Rad52*<sup>-/-</sup>  
189 mice,  $S\mu$ - $S\gamma 1$  and  $S\mu$ - $S\alpha$  DNA junctions showed fewer and shorter microhomologies than in *Rad52*<sup>+/+</sup> mice (Fig.  
190 6b, Extended Data Figs. 2,3), a reflection of involvement of Rad52 in CSR to isotypes other than IgD<sup>20</sup>. *Rad52*<sup>-/-</sup>  
191 mice showed significantly decreased total and/or OVA-specific IgD in circulating blood, bronchoalveolar lavage  
192 (BALF), feces (free or bound to fecal bacteria), and IgD-producing cells in MLNs and lamina propria, as compared  
193 to their *Rad52*<sup>+/+</sup> counterparts (Fig. 6c-h). This contrasted with the normal or elevated total and OVA-specific  
194 IgM, IgG1 and IgA levels in the same *Rad52*<sup>-/-</sup> mice, as predicted based on our previous findings<sup>27</sup>. Thus, Rad52  
195 is required to mount an efficient antigen-specific class-switched IgD response.

196 **Rad52 is modulated and phosphorylated by IgD CSR-inducing stimuli, and it is recruited to  $S\mu$  and  $\sigma\delta$ .** We  
197 analyzed *Rad52*, *Ku70*, *Ku86* and *Aicda* transcripts as well as respective Rad52, Ku70, Ku86 and AID proteins,  
198 including phosphorylated Rad52 (p-Rad52 has been shown to display enhanced ssDNA annealing activity<sup>28</sup>), in  
199 B cells induced to undergo CSR to IgD. Mouse B cells stimulated by LPS plus IL-4 and human B cells stimulated

200 by CD154 plus IL-4 and IL-21 increased *Ku70/Ku86* and Ku70/Ku86 expression at 24-48 h concomitant with  
201 significantly greater expression of *Aicda* and AID, which was nearly undetectable at time 0, while somewhat  
202 downregulating *Rad52* and Rad52. Rad52 protein, however, was progressively phosphorylated within the same  
203 time range (Fig. 7a-c). Further supporting its role in CSR to IgD, Rad52 was recruited to  $S\mu$ ,  $\sigma\delta$  (and  $S\gamma 1$ ) in B  
204 cells stimulated by LPS plus IL-4, which induced  $S\mu$ - $\sigma\delta$  (and  $S\mu$ - $S\gamma 1$ ) DNA recombination, but not by stimuli  
205 that did not induce  $S\mu$ - $\sigma\delta$  recombination, i.e., LPS alone or LPS plus TGF- $\beta$  and RA, as shown by chromatin  
206 immunoprecipitation (ChIP) using an anti-Rad52 Ab – the specificity of the ChIP Rad52 recruitment assay being  
207 emphasized by the lack of chromatin immunoprecipitation in *Rad52*<sup>-/-</sup> B cells (Fig. 7d,e). Recruitment of Rad52  
208 but not Ku70/Ku86 to  $\sigma\delta$  in CSR to IgD, as induced by LPS plus IL-4, contrasted with that of Ku70/Ku86 to  $S\gamma 3$   
209 and  $S\alpha$  regions as induced in CSR to IgG3 and IgA (Fig. 7f), a possible reflection of the competition of these HR  
210 and NHEJ elements for binding to S region DSB ends<sup>20</sup>. Notably, LPS plus IL-4 induced recruitment of Rad52  
211 but not Ku70/Ku86 to  $\sigma\delta$ , while inducing mostly Ku70/Ku86 recruitment to  $C\gamma 1$ , consistent with the efficient LPS  
212 plus IL-4 induction of CSR to IgG1, mediated mainly by NHEJ<sup>20</sup>. Thus, Rad52 expression and, importantly, Rad52  
213 phosphorylation are modulated by IgD CSR-inducing stimuli.

#### 214 **Stimuli that induce $S\mu$ - $\sigma\delta$ DNA recombination downregulate ZFP318/Zfp318 and lead to IgD secretion.**

215 Next, we addressed the expression of mIgD and sIgD and its regulation by stimuli inducing CSR to IgD. Resting  
216 B cells expressed mIgD and mIgM, but little or no sIgD or sIgM, reflecting high levels of *V<sub>H</sub>DJ<sub>H</sub>-C $\delta$ m* and *V<sub>H</sub>DJ<sub>H</sub>-*  
217 *C $\mu$ m* transcripts and low levels of *V<sub>H</sub>DJ<sub>H</sub>-C $\delta$ s* and *V<sub>H</sub>DJ<sub>H</sub>-C $\mu$ s* transcripts (Fig. 8a). Induction of CSR to IgD (by  
218 LPS or CD154 plus IL-4) resulted in loss of virtually all mIgD, emergence of *V<sub>H</sub>DJ<sub>H</sub>-C $\delta$ s* transcripts together with  
219 *V<sub>H</sub>DJ<sub>H</sub>-C $\mu$ s* transcripts and significant IgD secretion (Fig. 8a-b). By contrast, application of IgD CSR non-  
220 inducing stimuli (LPS plus TGF- $\beta$  and RA) to similar naive IgM<sup>+</sup>IgD<sup>+</sup>B cells resulted in partial loss of mIgD, no  
221 change in *V<sub>H</sub>DJ<sub>H</sub>-C $\delta$ m* transcripts and marginal IgD secretion (Fig. 8a-b). The changes in *V<sub>H</sub>DJ<sub>H</sub>-C $\delta$ m*, *V<sub>H</sub>DJ<sub>H</sub>-*  
222 *C $\delta$ s* transcripts, mIgD and sIgD brought about by IgD CSR-inducing stimuli paralleled the downregulation of  
223 *Zfp318* transcripts and Zfp318 protein – Zfp318 represses the TTS that mediates alternative transcriptional *V<sub>H</sub>DJ<sub>H</sub>-*  
224 *C $\mu$ /*V<sub>H</sub>DJ<sub>H</sub>-C $\delta$  termination, thereby allowing for long-range transcription throughout *V<sub>H</sub>DJ<sub>H</sub>-C $\mu$ -s-m-C $\delta$ -s-m* DNA  
225 (Fig. 8c-e). Zfp318 downregulation was specific to IgD CSR, as it did not occur in response to IgA CSR-inducing  
226 stimuli (LPS plus TGF- $\beta$  and RA). *ZFP318* downregulation concomitant with decreased mIgD expression and  
227 increased IgD secretion was reproduced in human B cells submitted to IgD CSR-inducing stimuli (CpG plus IL-  
228 2 and IL-21) but not IgD CSR non-inducing stimuli (CpG plus IL-4 and IL-21) (Fig. 8,f). Similarly, *ZFP318*  
229 transcripts and ZFP318 protein were downregulated in human B cells undergoing IgD CSR *in vivo*, as in tonsils  
230 (Fig. 8,g). Zfp318 downregulation was independent and likely preceding expression of AID or Rad52, as revealed  
231 by virtual absence of *Zfp318* transcripts in LPS plus IL-4-induced *Aicda*<sup>-/-</sup> B cells, *Rad52*<sup>-/-</sup> B cells and *Rad52*<sup>+/+</sup>  
232 B cells, all of which lost mIgD expression as compared to similar B cells stimulated by IgA CSR-inducing stimuli  
233 (LPS plus TGF- $\beta$  and RA) (Fig. 8h-j). Thus, the stimuli that specifically induce CSR to IgD downregulate  
234 ZFP318/Zfp318 independently of AID or Rad52 expression and prior to  $S\mu$ - $\sigma\delta$  DNA recombination.**

235 **RAD52 knockdown reduces  $S\mu$ - $\sigma\delta$  DNA recombination and IgD secretion in human B cells.** The high  
236 frequency of microhomologies in  $S\mu$ - $\sigma\delta$  junctions of human tonsil B cells *in vivo* and human B cells induced to

237 undergo CSR to IgD *in vitro* (Figs. 3a,4,6b, Extended Data Figs. 1-5) suggested to us that RAD52 also mediates  
238 S $\mu$ - $\sigma\delta$  DNA recombination in human B cells. We purified naïve IgM<sup>+</sup>IgD<sup>+</sup>B cells from peripheral blood of 3  
239 healthy subjects and knocked down using *RAD52*-specific siRNAs *RAD52* transcripts and RAD52 protein by up  
240 to 75% and 95%, respectively. In these B cells, S $\mu$ - $\sigma\delta$  recombination, as induced by CpG plus IL-2 and IL-21,  
241 was virtually abolished, while *AICDA* or AID expression and S $\mu$ -S $\gamma$ 1 recombination were not altered (Fig. 9a-c).  
242 The reduced S $\mu$ - $\sigma\delta$  DNA recombination in RAD52 knockdown human B cells was associated with decreased  
243 expression of *V<sub>H</sub>DJ<sub>H</sub>-C $\delta$ s* transcripts, without significant alteration of *V<sub>H</sub>DJ<sub>H</sub>-C $\delta$ m* transcripts (Fig. 9d). The  
244 critical role of RAD52 in human CSR to IgD was emphasized by RAD52 recruitment to S $\mu$  and  $\sigma\delta$  regions in  
245 human naïve B cells induced to undergo CSR to IgD (by CpG plus IL-2 and IL-21) *in vitro*, human tonsil (IgD<sup>+</sup>)  
246 B cells undergoing CSR to IgD *in vivo*, but not in unstimulated naïve IgD<sup>+</sup>IgM<sup>+</sup> B cells (Fig. 9e). Thus, Rad52  
247 critically mediates CSR to IgD through S $\mu$ - $\sigma\delta$  recombination in human B cells.

248 **S $\mu$ - $\sigma\delta$  DNA recombination leads to IgD plasma cell differentiation.** To determine whether the substantial IgD  
249 production we observed only upon induction of CSR to IgD (Figs. 5b,6c-h,8b,f) would be associated with plasma  
250 cell differentiation, we analyzed human IgM<sup>+</sup>IgD<sup>+</sup>B cells induced to undergo CSR to IgD by CpG plus IL-2 and  
251 IL-21. More than 13% of these B cells became mIgM<sup>-</sup>intracellular IgD<sup>+</sup> compared to about half of their  
252 counterparts stimulated by CpG plus IL-4 and IL-21 and not switching to IgD (Fig. 10a). More than 90% of the  
253 IgM<sup>-</sup>IgD<sup>+</sup>B cells emerging from CpG plus IL-2 and IL-21 simulation expressed BLIMP-1 and almost 60% were  
254 CD27<sup>+</sup>CD38<sup>+</sup> versus about 10% of the IgM<sup>+</sup>IgD<sup>+</sup>B cells from CpG plus IL-4 and IL-21 expressing BLIMP-1 and  
255 less than 12% being CD27<sup>+</sup>CD38<sup>+</sup>. Among mouse IgM<sup>+</sup>IgD<sup>+</sup>B cells induced to undergo CSR to IgD by LPS plus  
256 IL-4, about 25% expressed intracellular IgD. All these B cells also expressed Blimp-1 and 70% or more acquired  
257 CD138 (Fig. 10b). By contrast, among IgM<sup>+</sup>IgD<sup>+</sup>B cells induced to undergo CSR to IgA by LPS plus TGF- $\beta$  and  
258 RA, about 50% expressed intracellular IgD but virtually none expressed Blimp-1 or acquired surface CD138. The  
259 relevance of IgD CSR to sustained IgD secretion was suggested by analysis of 3 human myelomas, two IgD and  
260 one IgA. Both IgD myelomas displayed S $\mu$ - $\sigma\delta$  DNA, but not S $\mu$ -S $\alpha$  DNA recombination (Fig. 10c). Conversely,  
261 the IgA myeloma showed S $\mu$ -S $\alpha$ , but not S $\mu$ - $\sigma\delta$  DNA recombination. Thus, IgD<sup>+</sup>B cells emerging by CSR would  
262 be prone to differentiate into IgD-secreting plasmablasts/plasma cells for sustained IgD secretion. And such  
263 IgD<sup>+</sup>B cells may function as precursors of neoplastic IgD<sup>+</sup> transformants.

264 **B cell Rad52 phosphorylation, increased CSR to IgD and IgD autoantibodies in systemic autoimmunity.**  
265 Serum IgD have been suggested to increase in patients with inflammatory autoimmune diseases, such as systemic  
266 lupus erythematosus (SLE)<sup>29</sup> and rheumatoid arthritis<sup>30</sup>, and in hereditary autoinflammatory syndromes, most  
267 notably the hyper-IgD syndrome (HIDS)<sup>31-34</sup>. While in healthy humans, many B cells make IgD that react with  
268 components of the self<sup>35</sup>, we found patients with systemic lupus to display significantly higher levels of circulating  
269 IgD, including IgD specific for nuclear antigens, than their healthy subject controls (Fig. 11a,d). This possibly  
270 reflected the higher level of B cell Rad52 and/or p-Rad52 expression in such lupus patients (Fig. 11k). Similarly,  
271 we found lupus-prone MRL/*Fas*<sup>lpr/lpr</sup> mice to show far higher levels of IgD than their wildtype C57BL/6  
272 counterparts in serum, feces and BALF as well as increased IgD-coated bacteria in feces, a reflection of high  
273 levels of *V<sub>H</sub>DJ<sub>H</sub>-C $\delta$ s* transcripts in bone marrow, spleen, MLNs and Peyer's patches B cells as well as increased

274 numbers of IgD<sup>+</sup> B cells in lamina propria, MLNs and Peyer's patches (Fig. 11a-f). In MRL/*Fas*<sup>lpr/lpr</sup> mice, the  
275 elevated IgD levels reflected increased IgD-producing cells and increased S $\mu$ - $\sigma\delta$  DNA recombination in bone  
276 marrow, spleen, MLNs and Peyer's patches (Fig. 11g). Increased CSR to IgD in MRL/*Fas*<sup>lpr/lpr</sup> was associated  
277 with high levels of p-Rad52 expression, greater frequency and length of microhomologies in S $\mu$ - $\sigma\delta$  as compared  
278 to S $\mu$ -S $\gamma$ 1 and S $\mu$ -S $\alpha$  junctional sequences, as well as with a high frequency of somatic point-mutations in areas  
279 abetting S $\mu$ -S $\delta$  DNA junctions (Fig. 11h-k and Extended Data Fig. 6). Thus, high levels of B cells expressing p-  
280 Rad52 are associated with high levels of IgD and IgD autoantibodies to nuclear antigens in lupus patients and in  
281 lupus-prone MRL/*Fas*<sup>lpr/lpr</sup> mice. In these mice, S $\mu$ - $\sigma\delta$  DNA recombination events involving high frequency of  
282 junctional microhomologies occur in B cells of different body districts, giving rise to high levels of IgD  
283 autoantibodies locally and systemically.



284 **Discussion**

285 The mechanism of CSR to IgG, IgA and IgE are quite well understood, as mediated by Ku70/Ku86-dependent  
286 NHEJ, although occurrence of a “residual” IgM to IgG CSR in B cells lacking Ku70/Ku86 expression has  
287 suggested the existence of a Ku70/Ku86-independent A-EJ synaptic mechanism<sup>18-20</sup>. Mice lacking 53BP1, in  
288 which NHEJ-dependent CSR to IgG, IgA and IgE was significantly decreased – 53BP1 protects resection of DSB  
289 ends, thereby skewing the synaptic process toward NHEJ – showed increased CSR to IgD and increased  
290 circulating IgD levels, suggesting that the short-range S $\mu$ - $\sigma\delta$  CSR was mediated by a 53BP1-independent synaptic  
291 process involving resected DSB ends and entailing a high frequency of S $\mu$ - $\sigma\delta$  junctional microhomologies<sup>22,23</sup>.  
292 This together with our previous demonstration that Rad52 plays a central role in synapsing intra-S $\mu$  region  
293 resected DSB ends as well as *c-Myc/IgH* locus translocations also involving resected DSB ends, both processes  
294 entailing significant junctional microhomologies, prompted us to hypothesize that Rad52 mediates the A-EJ  
295 process that synapses S $\mu$  and  $\sigma\delta$  DSB with complementary overhangs in CSR to IgD<sup>20</sup>. Here, we demonstrated  
296 that Rad52 mediates CSR to IgD in mouse and human B cells (Extended Data Fig. 7), thereby unveiling a  
297 previously unknown, critical and dedicated role of this HR factor in mammalian DNA repair.

298 We have provided here unequivocal evidence that Rad52 is critical for CSR to IgD *in vitro* and *in vivo*, in  
299 mouse and human B cells. In mouse *Rad52*<sup>-/-</sup> B cells, S $\mu$ - $\sigma\delta$  DNA recombination was ablated and IgD secretion  
300 greatly reduced. Similarly, in *RAD52* knockdown B cells from healthy subjects, S $\mu$ - $\sigma\delta$  DNA recombination was  
301 virtually abrogated and IgD secretion greatly decreased – as expected<sup>1,5</sup>, S $\mu$ - $\sigma\delta$  DNA recombination could not  
302 occur in the absence of AID, which introduces DSBs in  $\sigma\delta$  as it does in S $\mu$ , S $\gamma$ , S $\alpha$  or S $\epsilon$ . In mouse *Rad52*<sup>-/-</sup> B  
303 cells and human *RAD52* knockdown B cells, decreased post-recombination *V<sub>H</sub>DJ<sub>H</sub>-C $\delta$ s* transcripts resulted in  
304 reduced IgD secretion, which occurred in presence of unaltered transmembrane *V<sub>H</sub>DJ<sub>H</sub>-C $\delta$ m* transcript levels, at  
305 least within the first 72 hours from CSR induction. Interestingly, the stimuli that selectively induced CSR to IgD  
306 modulated the overall levels of *Ku70/KU70*, *Ku86/KU86* and *Rad52/RAD52* transcripts while significantly  
307 upregulating *Aicda/AICDA* in mouse and human B cells. This was concomitant with induction of AID and  
308 moderate decrease in Rad52 protein, which, in fact, was increasingly phosphorylated at Tyr104. Rad52 Tyr104  
309 phosphorylation has been shown to boost Rad52-mediated DNA single-strand annealing and is possibly effected  
310 by c-ABL kinase<sup>28</sup>. Rad52 involvement in CSR to IgD was further emphasized by recruitment of this protein to  
311  $\sigma\delta$  region (in addition and necessarily to S $\mu$ ) *in vivo* in human tonsil IgD<sup>+</sup> B cells, as well as *in vitro*, in mouse  
312 and human naïve B cells induced to undergo CSR to IgD, but no or only marginally in similar B cells undergoing  
313 CSR to IgG3 or IgA. Instead, these B cells recruited Ku70/Ku86 to S $\gamma$ 3 and S $\alpha$ , consistent with the major  
314 contribution of NHEJ to CSR to IgG3 and IgA.

315 Rad52 is a member of the eponymous epistasis group for DSB repair that shows strong evolutionary  
316 conservation<sup>17,36</sup>. In *Saccharomyces cerevisiae*, Rad52 is a key element of the HR pathway, and its deletion or  
317 mutation impairs DNA DSB repair<sup>37,38</sup>. Indeed, yeast Rad52 is a recombination mediator and a facilitator of  
318 annealing of complementary DNA single-strands<sup>39,40</sup>. It functions as a cofactor of Rad51, which forms  
319 nucleoprotein filaments with single-strand DNA and promotes strand pairing, by overcoming the inhibitory effect  
320 of replication protein A (RPA)<sup>41</sup>. By contrast, Rad52 mutation or even deletion results in no obvious abnormalities

321 in viability or functions in mammalian cells. As we have shown, *Rad52*<sup>-/-</sup> mice displayed no significant alteration  
322 of immune system elements, including B cells<sup>20</sup>, possibly owing to the presence of mammalian gene paralogues,  
323 such as *BRCA2* and *RAD51*, which by encoding functions related to Rad52, can compensate for the absence of  
324 this factor<sup>42</sup>. Human BRCA2 functions as a recombination mediator by facilitating RAD51 nucleoprotein filament  
325 formation<sup>40,43-45</sup>. Nevertheless, human BRCA2 cannot facilitate annealing of RPA-coated DNA, a function that  
326 Rad52 carries out efficiently in the absence of BRCA2<sup>46</sup>. This together with Rad52 involvement in DSB repair at  
327 stalled or collapsed replication forks points at a unique role of Rad52 in catalyzing single-strand annealing in  
328 homology-directed DNA repair in human cells<sup>47-49</sup>.

329 Our identification of Rad52 as essential in IgD CSR S $\mu$ - $\sigma$  $\delta$  synapses provides, to the best of our knowledge,  
330 the first demonstration of a critical and dedicated role of this factor in mammalian DNA repair. The short-range  
331 Rad52-mediated S $\mu$ - $\sigma$  $\delta$  recombination of resected DSB ends adds to the other Rad52-mediated short-range DSB  
332 recombination we recently uncovered: intra-S $\mu$  region DSB recombination<sup>20</sup>. This, like S $\mu$ - $\sigma$  $\delta$  synapsing,  
333 engages resected DSB ends and yields significant junctional nucleotide microhomologies<sup>20</sup>. In this function, as  
334 in CSR to IgD, Rad52 is not fungible in mouse or human B cells. Our identification of Rad52 as the critical  
335 element in S $\mu$ - $\sigma$  $\delta$  synapsis also sheds light on the mechanistic nature of the CSR A-EJ DSB repair pathway  
336 (originally referred to as A-NHEJ<sup>19</sup>). As per our current findings, the CSR A-EJ pathway uses HR Rad52 to  
337 synapse upstream and downstream DSB overhangs by a MMEJ process but does not require a homologous  
338 template as a guide, as the HR pathway does. The DNA polymerase  $\theta$  has been suggested to contribute to A-EJ<sup>21</sup>.  
339 Our previous findings, however, did not support a role of this polymerase in Rad52-mediated intra-S $\mu$  DSB  
340 recombination or S $\mu$ -S $\gamma$ 1, S $\mu$ -S $\gamma$ 3, S $\mu$ -S $\gamma$ 2a/S $\gamma$ 2c and S $\mu$ -S $\alpha$  recombination (CSR to IgG1, IgG3, IgG2a/IgG2c  
341 and IgA)<sup>20</sup>. Finally, while (MMEJ) A-EJ functions as a back-up pathway in cells defective in NHEJ or HR, it also  
342 synapses DSB ends in cells that are competent for both NHEJ and HR<sup>50</sup>, as exemplified by microhomologies in  
343 S-S junctions in a proportion of B cells that class-switched to IgG, IgA and IgE, as well as the disappearance of  
344 such microhomologies upon Rad52 ablation<sup>20</sup>.

345 As we showed here, Rad52 works in concert with Zfp318 to modulate IgD expression through an interplay of  
346 alternative RNA splicing and DNA recombination, the latter after AID intervention. Zfp318 represses the TTS  
347 intercalated between the C $\mu$  and C $\delta$  exons within the *Igh $\mu$ /Igh $\delta$*  loci transcriptional complex unit<sup>10,11</sup>, thereby  
348 allowing for transcription of long primary *V<sub>H</sub>DJ<sub>H</sub>-C $\mu$ -s-m-C $\delta$ -s-m* RNA. Zfp318, however, would also  
349 simultaneously allow for the continuous expression of primary *I $\mu$ -C $\mu$ -s-m-C $\delta$ -s-m* RNA transcripts. In fact, albeit  
350 possibly more abundant, hence their predominant detection in our specific PCR assays, *I $\mu$ -C $\delta$*  transcripts – in  
351 secretory or membrane form – are identical in sequence to their post-recombination *I $\mu$ -C $\delta$*  counterparts (Fig. 1a,b).  
352 During B cell development, Zfp318 expression closely parallels mIgD expression<sup>10,11</sup>. Indeed, consistent with its  
353 repression of the TTS intercalated between the C $\mu$  and C $\delta$  exons complex, the Zfp318 protein is expressed during  
354 the transition from immature IgM<sup>+</sup>IgD<sup>-</sup> to mature IgM<sup>+</sup>IgD<sup>hi</sup> B cell<sup>10,11</sup>. As we showed here, naïve mature B cells  
355 which express high levels of mIgD also express high levels of *Zfp318* transcripts and Zfp318 protein. In these B  
356 cells, stimuli that induced S $\mu$ - $\sigma$  $\delta$  DNA recombination, yielding primary *V<sub>H</sub>DJ<sub>H</sub>-C $\delta$ -s-m* RNA transcripts, also  
357 induced profound downregulation of *Zfp318* transcripts and Zfp318 protein, suggesting that relieving Zfp318-



358 mediated TTS repression is a prerequisite for  $S\mu$ - $\sigma\delta$  DNA recombination to unfold. Conversely, as we also  
359 showed here, naïve mature  $IgM^+IgD^+$  B cells submitted to stimuli that induced CSR to isotypes other than IgD,  
360 such as IgA (by LPS plus IL-4 and RA), further upregulated *Zfp318* transcripts and Zfp318 protein, concomitant  
361 with no  $S\mu$ - $\sigma\delta$  recombination, thereby allowing for massive expression of mIgD rather than sIgD.

362 The role of Zfp318 as gene transcription regulator is highly specific for IgD, as genome-wide transcriptome  
363 analysis of B cell Zfp318-deficient (*Vav-Cre* dependent deletion) mice identified *Sva* as the only other gene  
364 altered in expression<sup>11</sup> – interestingly, *Sva* is also involved in alternative splicing, albeit outside the *IgH* locus<sup>51</sup>.  
365 Zfp318 would be under the control of 5' AMP-activated protein kinase (Ampk). This is phosphorylated by Lbk1<sup>52</sup>,  
366 whose signaling triggers the B cell GC reaction. Indeed, Lbk1's failure to activate Ampk or Ampk loss specifically  
367 muted Zfp318 expression and IgD transcription<sup>52</sup>. In contrast, activation of Ampk by phenformin impaired GC  
368 formation<sup>52</sup>, likely by heightening Zfp318 expression, possibly in addition to other mechanisms. This would result  
369 in increased expression of primary *V<sub>H</sub>DJ<sub>H</sub>-C $\mu$ -s-m-C $\delta$ -s-m* RNA transcripts but not  $S\mu$ - $\sigma\delta$  DNA recombination,  
370 suggesting that CSR to IgD is one of the multiple and complex events inherent to GC formation. This is triggered  
371 by naturally occurring generally microbial stimuli, as in tonsil GCs and GCs or other secondary lymphoid  
372 formations in aerodigestive mucosae<sup>1,5,6</sup>. Consistent with the contention that Ampk mediates the regulation of  
373 Zfp318 as well as the contrasting impact of IgD CSR-inducing (LPS plus IL-4) and non-inducing stimuli (LPS  
374 plus TGF- $\beta$  and RA) on expression of Zfp318, stimulation of both human and mouse cells by LPS has been shown  
375 to result in dephosphorylation/inactivation of Ampk, while similar cell stimulation by TGF- $\beta$  resulted in rapid  
376 phosphorylation/activation of this protein kinase<sup>53</sup>.

377 In our experiments, stimuli that induced CSR to IgD (e.g., LPS plus IL-4 in mouse B cells, and CD154 plus  
378 IL-2 and IL-21 in human B cells) also downregulated Zfp318 expression which, in turn, reduced *V<sub>H</sub>DJ<sub>H</sub>-C $\delta$ m*  
379 transcript level and mIgD, while greatly increasing *V<sub>H</sub>DJ<sub>H</sub>-C $\delta$ s* transcripts and sIgD. This argues for CSR to IgD  
380 to be critical for significant IgD secretion. Indeed, stimuli that induced  $S\mu$ - $\sigma\delta$  recombination and IgD secretion  
381 also induced plasmablast/plasma cell differentiation, as shown by Blimp-1 and C38<sup>+</sup>CD27<sup>+</sup> expression in human  
382 B cells, and Blimp-1 and CD138<sup>+</sup> in mouse B cells. A similar outcome was not produced by stimuli that did not  
383 induce  $S\mu$ - $\sigma\delta$  recombination and IgD secretion in mouse or human B cells. Thus, while alternative splicing of  
384 long primary *V<sub>H</sub>DJ<sub>H</sub>-C $\mu$ -s-m-C $\delta$ -s-m* RNA transcripts in B cells that have not undergo CSR would make some  
385 contribution to the overall level of IgD production *in vivo*, CSR to IgD is likely required for substantial and  
386 sustained IgD production, as secreted by plasmablasts/plasma cells or by neoplastic transformants, such as IgD  
387 myeloma cells. The limited IgD amounts detected in supernatants of mouse or human B cells primed by stimuli  
388 that induced high levels of mIgD but not  $S\mu$ - $\sigma\delta$  synaptic recombination would result from translation of  
389 alternative spliced long primary *V<sub>H</sub>DJ<sub>H</sub>-C $\mu$ -s-m-C $\delta$ -s-m* RNA transcripts as well as some “shedding” of mIgD.

390 Bacteria and viruses have been suggested to play an important role in driving CSR to IgD, generally through  
391 stimulation of TLRs in gut and respiratory lymphoid tissues, and mesenteric lymph nodes, possibly leading to  
392 emergence of plasmablasts and plasma cells secreting IgD<sup>1,3-5,51,54-56</sup>. Circulating IgD are increased in patients  
393 with frequent respiratory infections or chronic lung inflammation suggesting a protective role for this Ig

394 isotype<sup>1,3,5,56</sup>. Our findings support the notion that both T-dependent (CD154) and T-independent (TLR ligands)  
395 stimuli induce S $\mu$ - $\sigma$  $\delta$  DNA recombination, in combination with various cytokines<sup>1,4-6</sup>. Interestingly, although we  
396 previously showed that BCR-signaling synergizes with TLR-signaling for induction of AID and CSR to IgG and  
397 IgA<sup>25</sup>, BCR signaling did not synergize with TLR7 or TLR9 signaling to induce CSR to IgD, as shown by the lack  
398 of S $\mu$ - $\sigma$  $\delta$  DNA recombination in B cells stimulated by CpG or R848 plus IL-4 and anti-Ig $\delta$  Ab. In the *in vivo* T-  
399 dependent antibody response to OVA, ablation of CSR to IgD (*Rad52*<sup>-/-</sup> mice) resulted in reduced levels of total  
400 and specific IgD in circulating blood and BALF, decreased total and/or bacteria-bound IgD in feces as well as  
401 decreased numbers of IgD<sup>+</sup> B cells lamina propria and MLNs, a privileged site of IgD CSR<sup>12</sup>. As predicted by  
402 our previous findings<sup>20</sup>, the overall decreased IgD levels in *Rad52*<sup>-/-</sup> mice were associated with increased IgG1  
403 and IgA as well as greatly decreased frequency and lengths of microhomologies in S $\mu$ -S $\gamma$ 1 and S $\mu$ -S $\alpha$  junctions.  
404 This reflected the lack of Rad52 contribution to the synaptic process underpinning such junctions as well as the  
405 lack of Rad52 competition with Ku70/Ku86<sup>20</sup>, which resulted solely in Ku70/Ku86-mediated NHEJ, a process  
406 that limits microhomologies to 0-3 nt<sup>16</sup>.

407 Information on the contribution of IgD to autoimmunity is scant and contradictory. Self-antigen-binding and  
408 mostly polyreactive IgD occur in healthy subjects, much like IgM or even IgG and IgA do<sup>35,57-60</sup>. High levels of  
409 IgD have been reported in rheumatoid arthritis patients and thought to possibly be implicated in the pathogenesis  
410 of the disease<sup>30</sup>. mIgD expression, however, has been speculated to exert an inhibitory effect on B cell  
411 autoreactivity, as suggested by elevated autoantibody production, increased deposition of immune complexes in  
412 kidneys and severe nephritis in lupus-prone C56BL/6*lpr* mice with deletion of the Ig $\delta$  locus<sup>61,62</sup>. Our findings  
413 showed total and self-reactive IgD (dsDNA, histone, RNP/Sm or RNA and ANAs) to be elevated in the circulation  
414 of lupus patients and lupus-prone MRL/*Fas*<sup>*lpr/lpr*</sup> mice. The latter displayed higher levels of IgD in serum, BALF  
415 and feces, than their wildtype C57BL/6 counterparts. Such high IgD levels reflected CSR recombinations that  
416 included S $\mu$ - $\sigma$  $\delta$  junctions with extensive microhomologies and high frequency of somatic mutations in the DNA  
417 areas abetting S $\mu$ - $\sigma$  $\delta$  junctions. Such IgD CSR occurred in different districts, such as bone marrow, spleen, MLNs  
418 and Peyer's patches, and were reflected in the IgD<sup>+</sup>B cells in those districts. This together with the B cell high  
419 levels of p-Rad52 and the low levels Zfp318 indicated that in murine and likely human lupus, IgD autoantibodies  
420 stem from extensive B cell S $\mu$ - $\sigma$  $\delta$  recombination rather than alternative splicing of primary *V<sub>H</sub>DJ<sub>H</sub>-C $\mu$ -s-m-C $\delta$ -s-*  
421 *m* RNA transcripts. Our findings do not suggest a "protective" role of IgD in autoimmunity<sup>61,62</sup>, while supporting  
422 a role of CSR to IgD in systemic lupus autoantibody responses.

423 Collectively, our data outline a critical and dedicated role of Rad52 in mediating the synapsis of S $\mu$  with  
424  $\sigma$  $\delta$  DSB resected ends. They also provide the first demonstration of Rad52 as a critical element in the poorly  
425 understood contribution of A-EJ to the resolution of DSBs in nonmalignant cells. In malignant B cells, Rad52 is  
426 involved in DNA recombination events that give rise to DNA deletions and translocations. As we previously  
427 showed, Rad52 ablation reduced the frequency of *c-Myc/IgH* translocations in mouse *p53*<sup>-/-</sup> B cells by more than  
428 70%, with the residual translocations containing limited microhomologies<sup>20</sup>. Whether Rad52 intervention extends  
429 to other modalities of A-EJ in neoplastic and non-neoplastic lymphoid mammalian cells remains to be determined.  
430 The importance of this newly unveiled and essential function of Rad52 is further emphasized by our demonstration

431 that this highly conserved HR element is critical for CSR to IgD in both mouse and human B cells. This together  
432 with the further reduction of the physiologically moderate microhomologies in S $\mu$ -S $\gamma$ 1, S $\mu$ -S $\gamma$ 3, S $\mu$ -S $\alpha$  and S $\mu$ -  
433 S $\epsilon$  junctions in *Rad52*<sup>-/-</sup> B cells (current data and refs.<sup>18-20</sup>) solidifies the role of Rad52 as critical mediator of the  
434 A-EJ backup pathway underpinning the residual CSR to IgG, IgA and IgE in the absence of Ku70/Ku86 proteins<sup>20</sup>.  
435 Our findings also showed how stimuli that induce S $\mu$ - $\sigma\delta$  recombination coordinate Rad52 function, as enabled  
436 by phosphorylation, with downregulation of Zfp318, unique repressor of the TTS intercalated between the C $\mu$  and  
437 C $\delta$  loci, whose activity allows transcription throughout *V<sub>H</sub>DJ<sub>H</sub>-S $\mu$ -C $\mu$ -s-m- $\sigma\delta$ -C $\delta$ -s-m* and *I $\mu$ -C $\mu$ -s-m- $\sigma\delta$ -C $\delta$ -s-m*.  
438 Further, they indicate that CSR to IgD is required for sustained IgD secretion and possibly a prerequisite for IgD  
439 plasma cell differentiation. They also add new and significant information to a potential role of CSR to IgD, as  
440 promoted by Rad52 phosphorylation, in systemic autoimmunity. Finally, they provide important new molecular  
441 information to approach the virtually unexplored mechanistic underpinning of hyper-IgD syndrome, a relatively  
442 rare but a severe autoinflammatory disease associated with mevalonate kinase deficiency (due to *MVK* recessive  
443 mutations) and exorbitant levels of IgD<sup>31,32,63</sup>.

444

#### 445 **Acknowledgements**

446 We thank Dr. Patrick M. Sung for reviewing this manuscript. We also would like to thank Amanda Fisher, Dr.  
447 Justin B. Moroney, Dr. Helia N. Sanchez and Dr. Huoqun Gan for their help in some experiments. This work was  
448 supported by NIH grants R01 AI 079705, T32 AI138944, R01 AI 105813 and the Lupus Research Alliance Target  
449 Identification in Lupus Grant 641363 to P.C.

#### 450 **Author contributions**

451 Y. Xu and H. Zhou performed experiments; G. Post provided myeloma samples; H. Zan designed and performed  
452 experiments, analyzed data, supervised the work and wrote the manuscript; P. Casali planned the study, designed  
453 the experiments, analyzed the data, supervised the work and wrote the manuscript.

454 **Methods**

455 **Mice.** *Rad52*<sup>-/-</sup> mice were generated by replacing exon 3 of the *Rad52* gene with positive selection marker  
456 neomycin, as driven by the phosphoglycerate kinase (PGK) promoter, and an upstream mouse sequence  
457 functioning as a transcription terminator (Dr. Albert Pastink, Leiden University, Leiden, The Netherlands)<sup>36</sup>.  
458 *Rad52*<sup>-/-</sup> mice were backcrossed to C57/BL6 mice for more than six generations. No full length or truncated  
459 Rad52 protein was produced from the disrupted allele<sup>36</sup>. *Rad52*<sup>-/-</sup> mice were viable and fertile, and showed no  
460 gross abnormalities. *Aicda*<sup>-/-</sup> mice (C57BL/6 background)<sup>64</sup> were obtained from Dr. Tasuku Honjo (Kyoto  
461 University, Kyoto, Japan). C57BL/6 and MRL/*Fas*<sup>lpr/lpr</sup> mice were purchased from Jackson Laboratory (Bar  
462 Harbor, Maine). All mice were housed in pathogen-free conditions. Both male and female mice aged 8-12 weeks  
463 were used for the experiments. The Institutional Animal Care and Use Committees (IACUC) of the University  
464 of Texas Health Science Center at San Antonio approved all animal protocols.

465 **Mouse B cells and CSR induction *in vitro*.** Naïve IgM<sup>+</sup>IgD<sup>+</sup>B cells were isolated from spleens of 8–12-week-  
466 old C57BL/6, *Rad52*<sup>-/-</sup> or *Aicda*<sup>-/-</sup> mice as described<sup>25</sup>. B cells were resuspended in RPMI 1640 medium with  
467 10% FBS (FBS-RPMI), 50 mM β-mercaptoethanol and 1x antibiotic-antimycotic mixture (15240-062; Invitrogen)  
468 and stimulated with LPS (4 μg/ml) from *Escherichia coli* (055:B5; Sigma-Aldrich), CD154 (1 U/ml; obtained  
469 from membrane fragments of baculovirus-infected Sf21 insect cells<sup>25</sup>), CpG ODN 1826 (1.0 μM; Eurofins  
470 Genomics) or R848 (1.0 μM; Medkoo) plus nil, IL-4 (5.0 ng/ml; R&D Systems) and/or TGF-β (2.0 ng/ml; R&D  
471 Systems) and retinoic acid (RA, 10 nM) or anti-BCR Ab (anti-δ mAb-dextran, 30 ng/ml; Fina Biosolutions).  
472 Mouse B cells were cultured in FBS-RPMI at 37°C in 48-well plates for 24, 48, 72 and 96 h.

473 **Human B cells and CSR induction *in vitro*.** Naïve IgM<sup>+</sup>IgD<sup>+</sup>B cells were purified by negative selection using  
474 the EasySep<sup>TM</sup> human naïve B cell enrichment kit (19254; StemCell Technologies) from healthy subject PBMCs,  
475 following manufacturer's instructions. Tonsillar IgD<sup>+</sup> B cells were isolated from human tonsil cells by positive  
476 selection using biotin-anti-human IgD mAb (clone IA6-2; 348212, Biolegend) and MagniSort<sup>TM</sup> Streptavidin  
477 Positive Selection Beads (MSPB-6003-74, Thermo Fisher Scientific). Naïve B cells were stimulated with CD154  
478 (10 U/ml) or CpG ODN 2395 (1.0 μM; Eurofins Genomics) plus nil, IL-2 (20 ng/ml; BioLegend), IL-4 (20 ng/ml;  
479 R&D Systems), IL-15 and/or IL-21 (50 ng/ml; R&D Systems). Human B cells were cultured in FBS-RPMI at  
480 37°C in 48-well plates for 24, 48, 72, 96 and 120 h.

481 **Flow cytometry.** For surface staining, mononuclear cells were reacted with VF-anti-CD19 mAb (75-0193-0100,  
482 Tonbo), PE-anti-IgM mAb (clone RMM1, 406507, BioLegend), and FITC anti-mouse IgD mAb (clone 11-26c.2a,  
483 405704, BioLegend) and 7-AAD. For intracellular staining, cells were stained with anti-CD19 mAb (Clone 1D3;  
484 Tonbo) and fixable viability dye eFluor<sup>®</sup> 450 (FVD 450, eBiosciences) followed by incubation with the BD  
485 Cytotfix/Cytoperm buffer at 4°C for 20 min. After washing twice with the BD Perm/Wash buffer, cells were  
486 resuspended in HBSS with 1% BSA and stored overnight at 4°C. Cells were then stained with anti-Zfp318 Ab  
487 (AAS23325C, Antibody Verify; labeled with FITC using iLink<sup>TM</sup> Antibody Labeling Kits, ABP Biosciences).  
488 FACS analysis was performed on single cell suspensions. In all flow cytometry experiments, cells were  
489 appropriately gated on forward and side scattering to exclude dead cells and debris. Cell analyses were performed

490 using a LSR-II flow cytometer (BD Biosciences), and data were analyzed using FlowJo software (TreeStar). All  
491 experiments were performed in triplicates.

492 **Fluorescence microscopy.** Fluorescence microscopy of tissues. To analyze IgM and IgD-producing cells in the  
493 lamina propria and PPs, the intestine was folded into a “Swiss-roll”, fixed with PFA (4%), and embedded in  
494 paraffin. Ten  $\mu\text{m}$  sections were cut and heated at 80 °C to adhere to the slide, washed four times in xylene for  
495 2 min, dehydrated two times with 100% ethanol for 1 min, two times with 95% ethanol for 1 min and washed two  
496 times in water for 1 min. Antigens were unmasked using 2 mM EDTA in 100 °C for 40 mins followed by a cooling  
497 step at 25 °C on the bench top, 3 times washing with 1x TBS and blocking using 10% BSA for 15 min. Slides  
498 were again washed 3 times with 1x TBS and stained with FITC–anti-IgD mAb (clone 11-26c.2a; 405713,  
499 BioLegend), PE goat-anti-mouse-IgM mAb (406507, BioLegend) for 2 h in a dark moist chamber. After washing  
500 3 times with Triton X-100 (0.1%) in TBS, slides were air dried, and cover slips were mounted with ProLong<sup>®</sup>  
501 Gold Antifade Reagent with DAPI (Invitrogen). Fluorescence images were captured using a 10x objective lens  
502 with a Zeiss Axio Imager Z1 fluorescence microscope. To analyze IgD-producing cells in MLNs, 10  $\mu\text{m}$  MLN  
503 sections were prepared by cryostat and loaded onto positively charged slides, fixed in cold acetone and stained  
504 with FITC–anti-IgD mAb (405704, BioLegend), or PE goat-anti-mouse-IgM mAb (406507, BioLegend),  
505 respectively, for 1 h at 25 °C in a moist chamber. Cover slips were then mounted using ProLong<sup>®</sup> Gold Antifade  
506 Reagent using DAPI (Thermo Fisher), before examination with a fluorescence microscope.

507 Fluorescence microscopy of B cells. B cells were suspended at  $10^5$  cells/100  $\mu\text{l}$  in FCS-RPMI. Pre-labeled  
508 slides were then placed into Cytofunnels and ran with 50  $\mu\text{l}$  of FCS-RPMI in order to wet the Cytofunnel paper.  
509 Cells were then placed again into the Cytofunnel and spun at 800 RPM for 3 min using a Cytospin<sup>™</sup> 4  
510 Cytocentrifuge (Thermo Fisher). For intracellular visualization of IgM, IgD, CD138 and Blimp-1 proteins, cells  
511 were fixed with methanol for 15 min and washed 3 times in PBS-Tween 20. Cells were then blocked in 10% BSA  
512 for 15 min and stained with 1:20 APC-anti-mouse IgD Ab (clone 11-26c.2a; 405713, BioLegend), FITC-anti-  
513 mouse IgM mAb (11-5790-81, Thermo Fisher), overnight in a dark moist chamber.

514 **Detection of free and bacterial-bound antibodies.** Titers of serum, BALF or fecal total IgD, IgM, IgG1 and IgA  
515 and OVA-binding IgD, IgM, IgG1 and IgA were measured using specific ELISAs, as we described<sup>20,25,65,66</sup>. Total  
516 IgD in *in vitro* culture supernatants of stimulated human and mouse B cells or in serum, BALF or feces were  
517 measured by dot blotting with serially two-fold diluted samples.

518 Bacteria-bound IgD and IgA were detected in feces by flow cytometry, as we described<sup>27</sup>. Feces (10 mg)  
519 were suspended in 100  $\mu\text{l}$  1x PBS (filtered through 0.2  $\mu\text{m}$  filter), homogenized and centrifuged at  $400 \times g$  for 5  
520 min to remove large particles. The supernatant was then centrifuged at 8000 g for 10 min to remove non-bound  
521 antibodies (in supernatant). The bacterial pellet was suspended in 1 ml of PBS with 1% (w/v) BSA. After fixation  
522 with 7.2% formaldehyde for 10 min at room temperature, bacteria were washed with PBS, and stained with FITC–  
523 anti-IgD mAb (clone 11-26c.2a; 405713, BioLegend) or FITC-anti-IgA mAb (C10-3, BD Biosciences) on ice for  
524 30 min, washed with PBS, and further resuspended in 1 x PBS containing 0.2  $\mu\text{g ml}^{-1}$  DAPI for flow cytometry  
525 analysis. All events that stained with DAPI were considered as bacteria.



526 **S-S region DNA recombinations and S region somatic mutations.** Genomic DNA was prepared from human  
527 or mouse B cells using QIAmp DNA Mini Kit (Qiagen), or from paraffin-embedded human IgD or IgA myeloma  
528 tissue sections (obtained from the University of Arkansas for Medical Science) using Quick-DNA™ FFPE Kit  
529 (Zymo Research). Recombined  $S_{\mu}-\sigma\delta$ ,  $S_{\mu}-S\gamma1$ ,  $S_{\mu}-S\alpha$  and  $S_{\mu}-S\epsilon$  DNA were amplified by two sequential rounds  
530 of specific PCR using Phusion™ high-fidelity DNA polymerase (Thermo Scientific™) and nested oligonucleotide  
531 primers<sup>67</sup> (**Supplementary Table 1**). The first and second rounds of PCR were performed at 98 °C for 30 sec,  
532 58 °C for 45 sec, 72 °C for 4 min (30 cycles). Amplified DNA was fractionated through 1.0% agarose, blotted  
533 onto Hybond-N<sup>+</sup> membranes (GE Healthcare) and hybridized to biotin-labeled  $S_{\mu}$  and  $\sigma\delta$ ,  $S\gamma1$ ,  $S\alpha$  or  $S\epsilon$  specific  
534 probes. Detection was performed using the Chemiluminescent Nucleic Acid Detection Module (Thermo Fisher  
535 Scientific) according to the manufacturer's instructions. For sequence analysis of the recombined DNA, PCR  
536 products were purified using a QIAquick PCR purification kit (Qiagen). The amplified library was tagged with  
537 barcodes for sample multiplexing, and PCR was enriched and annealed to the required Illumina clustering adapters.  
538 High-throughput 300–base pair (bp) paired-end sequencing was performed by the UTHSCSA Genome  
539 Sequencing Facility using the Illumina MiSeq platform. S-S junctions and somatic mutations in the S regions  
540 were analyzed by sequence alignment as performed by comparing PCR products sequences with germline  $S_{\mu}$  and  
541  $\sigma\delta$ ,  $S\gamma1$  or  $S\alpha$  sequences using National Center for Biotechnology Information BLAST  
542 ([www.ncbi.nih.gov/BLAST](http://www.ncbi.nih.gov/BLAST)).

543 **RT-PCR and quantitative RT-PCR (qRT-PCR).** For quantification of mRNA, germline  $I_H-C_H$ , post-  
544 recombination  $I_{\mu}-C_H$  and mature  $V_HDJ_H-C_H$  transcripts, RNA was extracted from  $0.2-5.0 \times 10^6$  cells using either  
545 Trizol® Reagent (Invitrogen) or RNeasy Plus Mini Kit (Qiagen). Residual DNA was removed from the extracted  
546 RNA with gDNA eliminator columns (Qiagen). cDNA was synthesized from total RNA with the SuperScript™  
547 IV First-Strand Synthesis System (Thermo Fisher) using oligo-dT primer. Transcript expression was measured  
548 by qRT-PCR with the appropriate primers (Supplemental Table 1) using a Bio-Rad MyiQ™ Real-Time PCR  
549 Detection System (Bio-Rad Laboratories) to measure SYBR Green (IQ™ SYBR® Green Supermix, Bio-Rad  
550 Laboratories) incorporation with the following protocol: 95°C for 15 sec, 40 cycles of 94°C for 10 sec, 60°C for  
551 30 sec, 72°C for 30 sec. Data acquisition was performed during 72°C extension step. Melting curve analysis was  
552 performed from 72°C-95°C. Mature  $V_HDJ_H-C_{\mu m}$ ,  $V_HDJ_H-C_{\mu s}$ ,  $V_HDJ_H-C_{\delta m}$  and  $V_HDJ_H-C_{\delta s}$  transcripts were  
553 analyzed by semi-quantitative PCR using serially two-fold diluted cDNA.

554 **Western blotting.** B cells were lysed in Laemmli buffer. Cell extracts containing equal amounts of protein (50-  
555 100 µg) were fractionated through SDS-PAGE (6%). The fractionated proteins were transferred onto  
556 polyvinylidene difluoride membranes (Bio-Rad) overnight (30 V/90 mA) at 4 °C. After blocking and overnight  
557 incubation at 4 °C with anti-AID antibody (H-80, Santa Cruz), anti-Ku70 antibody (A0883, Abclonal), anti-Ku86  
558 antibody (A5862, Abclonal), anti-Rad52 antibody (H-300, Santa Cruz Biotechnology), anti-phospho-Rad52  
559 antibody (Y408472, Applied Biological Materials Inc.) or anti-β-Actin mAb (2F1-1, BioLegend), the membranes  
560 were incubated with horseradish peroxidase (HRP)-conjugated secondary antibodies. After washing with TBS-  
561 Tween 20 (0.05%), bound HRP-conjugated antibodies were detected using Western Lightning Plus-ECL reagents

562 (PerkinElmer Life and Analytical Sciences).

563 **ChIP and qPCR.** ChIP assays were performed as previously described<sup>68-70</sup>. Human or mouse B cells ( $1.0 \times 10^7$ )  
564 were treated with formaldehyde (1% v/v) for 10 min at 25°C to crosslink chromatin, washed once in cold PBS  
565 with protease inhibitors (Roche) and resuspended in lysis buffer (20 mM Tris-HCl, 200 mM NaCl, 2 mM EDTA,  
566 0.1% w/v SDS and protease inhibitors, pH 8.0). Chromatin was fragmented by sonication (DNA fragments of  
567 about 200 to 1,000 bp in length), pre-cleared with protein A agarose beads (Pierce) and incubated with agarose  
568 conjugated anti-Rad52 mAb (clone F-7; sc-365341 AC, Santa Cruz Biotechnology) at 4°C overnight. Immune  
569 complexes were washed and eluted (50 mM Tris-HCl, 0.5% SDS, 200 mM NaCl, 100 µg/ml proteinase K, pH  
570 8.0), followed by incubation at 65°C for 4 h. DNA was purified using a QIAquick PCR purification kit (Qiagen).  
571 The S $\mu$  or  $\sigma\delta$  region DNA was amplified from immunoprecipitated chromatin by qPCR using appropriate primers  
572 (**Supplemental Table 1**). Data were normalized to input chromatin DNA and depicted as relative abundance of  
573 each amplicon.

574 **RAD52 knockdown in human B cells.** The human RAD52-specific siRNA oligo duplex (TT320001, Locus ID  
575 5893) and non-effective Trilencer-27 Fluorescent-labeled transfection control siRNA duplex (SR30002) were  
576 obtained from Origene Technologies. The siRNA duplexes were used to transfect purified human naïve B cells  
577 using the Human B Cell Nucleofector™ Kit (VPA-1001, LONZA). Transfected B cells were then stimulated with  
578 CpG ODN 2395 plus IL-2 and IL-21 for 96 h before genomic DNA extraction for analysis of S $\mu$ - $\sigma\delta$  and S $\mu$ -S $\gamma$ 1  
579 DNA recombination. Expression of *RAD52* and *AICDA* transcripts were analyzed by qRT-PCR using specific  
580 primers 24 h after transfection. Expression of RAD52, phosphorylated-RAD52, AID and  $\beta$ -ACTIN proteins were  
581 analyzed by immune-blotting 24 h after transfection.

582 **High-throughput mRNA-Seq.** RNA was isolated from cells using the Directzol RNA Microprep Kit (Zymogen  
583 Research), according to manufacturer's instructions and as previously described<sup>66</sup>. RNA integrity was verified  
584 using an Agilent Bioanalyzer 2100 (Agilent). Next generation RNA-Seq for mRNA and non-coding RNA was  
585 performed by the Genome Sequencing Facility at University of Texas Health Science Center San Antonio Greehey  
586 Children's Cancer Research Institute. High-quality RNA was processed using an Illumina TruSeq RNA sample  
587 prep kit v2 or TruSeq Small RNA Sample Prep kit following the manufacturer's instructions (Illumina). Clusters  
588 were generated using TruSeq Single-Read Cluster Gen. Kit v3-cBot-HS on an Illumina cBot Cluster Generation  
589 Station. After quality control procedures, individual mRNA-Seq or small RNA-Seq libraries were then pooled  
590 based on their respective 6-bp index portion of the TruSeq adapters and sequenced at 50 bp/sequence using an  
591 Illumina HiSeq 3000 sequencer. Resulting reads were checked by assurance (QA) pipeline and initial genome  
592 alignment (Alignment). After the sequencing run, demultiplexing with CASAVA was employed to generate the  
593 Fastq file for each sample. All sequencing reads were aligned with their reference genome (UCSC mouse genome  
594 build mm9) using TopHat2 default settings, and the Bam files from alignment were processed using HTSeq-count  
595 to obtain the counts per gene in all samples. Quality control statistical analysis of outliers, intergroup variability  
596 and distribution levels, were performed for statistical validation of the experimental data.

597 **Statistical analysis.** Statistical analysis was performed using Excel (Microsoft) or Prism® GraphPad software.



598 *P*-values were determined by paired and unpaired Student's *t*-tests; and *P*-values <0.05 were considered  
599 significant.

600 **IRB for use of human tissues and peripheral blood as well as IACUC for use of mice.** For the use of DNA  
601 procured from formalin fixed paraffin embedded tissues obtained from the University of Arkansas for Medical  
602 Science, the study was reviewed by the University of Arkansas for Medical Sciences Institutional Review Board  
603 (IRB) which determined that this project is not human subject research as defined in 45 CFR 46.102. Human B  
604 cells were purified from PBMCs of healthy subject buffy coats obtained from South Texas Blood and Tissue  
605 Center, San Antonio, Texas, under the *Healthy Volunteer Blood Donor Program* and lupus patients B cells were  
606 purified PBMCs obtained under the Long School of Medicine IRB HSC 20140234H *Class switching, somatic*  
607 *hypermutation and plasma cell differentiation in B cells*. Mouse and mouse B cell studies were performed under  
608 the Long School of Medicine IACUC 20200019AR *Somatic hypermutation, class switch DNA recombination and*  
609 *plasma cell differentiation in antibody and autoantibody responses*.

610 **Figure legends**

611 **Fig. 1 | Expression of cell surface and secreted IgD and IgM, as well as  $I\mu$ -C $\delta$  transcripts by alternative**  
612 **splicing, alternative transcription termination and CSR. a,** Schematics of alternative splicing and alternative  
613 transcription termination for expression of membrane and secreted IgM and IgD, as well as germline  $I\mu$ -C $\mu$  and  
614  $I\mu$ -C $\delta$  transcripts in B cells. In the presence of Zfp318, which represses the transcription termination sites (TTS)  
615 of the C $\mu$  gene, mature B cells constitutively transcribe long primary  $V_HDJ_H$ -C $\mu$ -C $\delta$ s-m transcripts initiated by the  
616  $V_H$  promoter. These long primary transcripts undergo alternative splicing which removes intronic regions, leading  
617 to dual expression of mature  $V_HDJ_H$ -C $\mu$ s and  $V_HDJ_H$ -C $\delta$ m transcripts encoding IgM and IgD. In the absence of  
618 Zfp318, transcription stops at C $\mu$  TTS, resulting in a shorter primary transcript, which does not contain C $\delta$  exons,  
619 and lead to expression of a mature  $V_HDJ_H$ -C $\mu$ -s-m transcript only. Mature B cells also transcribe  $I\mu$ , C $\mu$ , and C $\delta$   
620 regions under control of the  $I\mu$  promoter. When Zfp318 is present, unswitched mature B cells constitutively  
621 transcribe long primary  $I\mu$ -C $\mu$ -s-m-C $\delta$ -s-m transcripts, which undergo alternative splicing to removes intronic  
622 regions, leading to dual expression of germline  $I\mu$ -C $\mu$  and  $I\mu$ -C $\delta$  transcripts. In the absence of Zfp318,  $I\mu$   
623 promoter-initiated transcription stops at C $\mu$  TTS, and only germline  $I\mu$ -C $\mu$  transcripts are expressed. **b,** Expression  
624 of membrane and secreted IgD, and  $I\mu$ -C $\delta$  transcripts by CSR. Schematic representation of CSR from IgM to  
625 IgD. The S $\mu$  region recombines with the  $\sigma\delta$  region and loops out the intervening DNA, which forms a switch circle.  
626 The recombined DNA is transcribed leading to expression of  $V_HDJ_H$ -C $\delta$ -s-m and  $I\mu$ -C $\delta$  transcripts, initiated by  
627 the  $V_H$  and  $I\mu$  promoters, respectively. In this case,  $I\mu$ -C $\delta$  transcripts are generated as post-recombination  
628 transcripts. Graphics depict portion of the *IgH* locus and the resulting primary and mature transcripts. The inset  
629 depicts a schematic representation of the detection of S $\mu$ - $\sigma\delta$  junctional DNA (CSR to IgD) by nested PCR  
630 amplification followed by Southern-blotting using specific S $\mu$  and  $\sigma\delta$  probes (Southern-blotting of amplified  
631 recombined S $\mu$ - $\sigma\delta$  DNA from human naïve and germinal center B cells). In many cases the amplified S $\mu$ - $\sigma\delta$  DNA  
632 was sequenced for further analysis of junctional sequence well as identification and census of mutations. iE $\mu$ , *IgH*  
633 intronic enhancer;  $I\mu$ , intervening  $\mu$  exon;  $\mu$ m, exon encoding the transmembrane region of IgM;  $\delta$ m, exon  
634 encoding the secretory piece of IgM;  $\sigma\delta$ , noncanonical switch-like region 5' to C $\delta$ ;  $\delta$ s, exon encoding the secretory  
635 region of IgD; C $\delta$ m, exon encoding the transmembrane region of IgD. Dotted gray lines show splicing  
636 configurations of primary transcripts to yield secreted and transmembrane forms of IgM and IgD.

637 **Fig. 2 | Identification of stimuli inducing CSR to IgD and S $\mu$ - $\sigma\delta$  junctions in mouse and human B cells. a,**  
638 Wildtype C57BL/6 and *Aicda*<sup>-/-</sup> mouse naïve B cells were stimulated with nil, LPS, LPS plus IL-4, LPS plus TGF-  
639  $\beta$  and RA, CD154, CD154 plus IL-4, CD154 plus TGF- $\beta$  and RA, CpG, CpG plus IL-4, CpG plus TGF- $\beta$  and RA,  
640 R848, R848 plus IL-4, R848 plus TGF- $\beta$  and RA, or CpG plus IL-4, or R848 plus IL-4 in the presence of anti-BCR.  
641 Recombined S $\mu$ - $\sigma\delta$ , as well as S $\mu$ -S $\gamma$ 1, S $\mu$ -S $\gamma$ 3, S $\mu$ -S $\alpha$  and S $\mu$ -S $\alpha$  DNA were analyzed 72 or 96 h post-stimulation  
642 by nested long-range PCR using forward  $I\mu$  and reverse C $\delta$  primers, or forward  $I\mu$  and reverse S $\gamma$ 1, S $\gamma$ 3, S $\alpha$  or S $\epsilon$   
643 primers, respectively, followed by Southern-blotting using a specific S $\mu$ ,  $\sigma\delta$ , S $\gamma$ 1, S $\gamma$ 3, S $\alpha$  or S $\epsilon$  probe, as indicated.  
644 **b,** Recombined S $\mu$ - $\sigma\delta$  DNA in human tonsil IgD<sup>+</sup> B cells, blood naïve B cells, or blood naïve B cells stimulated with  
645 CD145 or CpG plus IL-2 and IL-21, IL-4 and IL-21, or IL-2, IL-4 and IL-21 or IL-15 and IL-21, were analyzed 96 or  
646 120 h post-stimulation by nested long-range PCR using forward  $I\mu$  and reverse C $\delta$  primers, followed by Southern-

647 blotting using specific human  $S_{\mu}$  or  $\sigma\delta$  probe. Data are one representative of 3 independent experiments yielding  
648 comparable results. **c**, Germline/post-recombination  $I_{\mu}$ -C $\delta$  transcripts, post-recombination  $I_{\mu}$ -C $\gamma$ 1,  $I_{\mu}$ -C $\alpha$  and  $I_{\mu}$ -  
649 C $\epsilon$  transcripts in wildtype C57BL/6 B cells stimulated with nil, LPS plus IL-4, or LPS plus TGF- $\beta$  and RA, analyzed  
650 72 h post-stimulation by qRT-PCR and normalized to  $\beta$ -Actin expression. Each dot represents data obtained with  
651 B cells from an individual mouse ( $n = 3$  per group). Data are mean  $\pm$  SEM.

652 **Fig. 3 | Mouse and human  $S_{\mu}$ - $\sigma\delta$  DNA recombination junctions contain microhomologies and somatic**

653 **mutations.** **a**, Amplified junctional DNAs of intra- $\sigma\delta$  deletions, as well as  $S_{\mu}$ - $\sigma\delta$ ,  $S_{\mu}$ -S $\gamma$ 1 and  $S_{\mu}$ -S $\alpha$ 1

654 recombination from OVA-immunized C57BL/6 mouse spleen B cells, C57BL/6 mouse naive B cells stimulated

655 with LPS plus IL-4 and cultured for 96 h, as well as human tonsil B cells or human peripheral blood naive B cells

656 stimulated with CpG plus IL-2 and IL-21 and cultured for 96 or 120 h were sequenced by MiSeq. The length and

657 numbers of nucleotide overlaps (microhomologies) in intra- $\sigma\delta$  deletions,  $S_{\mu}$ - $\sigma\delta$ ,  $S_{\mu}$ -S $\gamma$ 1 and  $S_{\mu}$ -S $\alpha$ 1 junctional

658 DNAs are shown by violin plots. Each dot represents a unique junctional sequence ( $n = 45$  per group). **b**, Mouse

659 and human  $S_{\mu}$  and  $\sigma\delta$  regions consist of repetitive motifs, which are better suited substrates for Rad52-mediated

660 MMEJ than those in  $S_{\mu}$  and S $\gamma$ 1 or  $S_{\mu}$  and S $\alpha$ . As such, they can facilitate the formation of microhomologies.

661 Repetitive sequence elements in mouse and human  $S_{\mu}$ ,  $\sigma\delta$ , S $\gamma$ 1 and S $\alpha$  that can potentially form microhomologies

662 were identified by Pustell Matrix dot plot using MacVector software and are depicted by small dots. Intensity of

663 dots depicts frequency and degree of complementarity of respective sequences. **c**, Somatic point-mutations in  $S_{\mu}$

664 and  $\sigma\delta$  regions abetting recombined  $S_{\mu}$ - $\sigma\delta$  DNA junctions in IgD class-switched mouse and human B cells *in vitro*

665 and *in vivo*. Mutations were identified in a 48 to 506 nt stretch of  $S_{\mu}$  or  $\sigma\delta$  regions in unique  $S_{\mu}$ - $\sigma\delta$  DNA

666 recombination sequences. Each dot represents an individual sequence. Sequence data were pooled from 3

667 individuals in each group. In pie charts, the size of slices denotes the proportion of sequences with the same

668 number of mutations and the grey hue denotes the number of point-mutations per sequence; below the pie charts

669 is the overall mutation frequency (change/base). \*\* $p < 0.01$ , \*\*\* $p < 0.001$ , ns: not significant (unpaired  $t$  test).

670 **Fig. 4 | *In vivo* human  $S_{\mu}$ - $\sigma\delta$  DNA recombination junctions contain high frequencies of microhomologies.**

671 Amplified intra- $\sigma\delta$  deletional,  $S_{\mu}$ - $\sigma\delta$ ,  $S_{\mu}$ -S $\gamma$ 1 and  $S_{\mu}$ -S $\alpha$ 1 junctional DNAs from human tonsil B cells were

672 sequenced using MiSeq system. Thirty-two intra- $\sigma\delta$ ,  $S_{\mu}$ - $\sigma\delta$ ,  $S_{\mu}$ -S $\gamma$ 1 or  $S_{\mu}$ -S $\alpha$ 1 junction sequences are shown in

673 each column. Each sequence is compared with the corresponding germline  $S_{\mu}$  (above, blue) and  $\sigma\delta$ , S $\gamma$ 1 or S $\alpha$ 1

674 (below, red) sequences. Microhomologies (bold) were determined by identifying the longest region at the  $S_{\mu}$ - $\sigma\delta$ ,

675  $S_{\mu}$ -S $\gamma$ 1 or  $S_{\mu}$ -S $\alpha$ 1 junction of perfect uninterrupted donor/acceptor identity or the longest overlap region at the

676 S-S junction with no more than one mismatch on either side of the breakpoint.

677 **Fig. 5 | Rad52 mediates  $S_{\mu}$ - $\sigma\delta$  DNA recombination leading to IgD secretion.** **a**, Recombined  $S_{\mu}$ - $\sigma\delta$ ,  $S_{\mu}$ -S $\gamma$ 1,

678  $S_{\mu}$ -S $\alpha$  and  $S_{\mu}$ -S $\epsilon$  DNA in mouse  $Rad52^{+/+}$ ,  $Rad52^{-/-}$  and  $Aicda^{-/-}$  naive B cells stimulated with nil, LPS only, LPS

679 plus IL-4, LPS plus TGF- $\beta$  and RA, CD154 only, CD154 plus IL-4, or CD154 plus TGF- $\beta$  and RA, as well as  $S_{\mu}$ -

680 S $\gamma$ 3 in  $Rad52^{+/+}$ ,  $Rad52^{-/-}$  and  $Aicda^{-/-}$  B cells stimulated with LPS only, were analyzed 96 h post stimulation by

681 nested long-range PCR using forward  $I_{\mu}$  and reverse C $\delta$ , S $\gamma$ 1, S $\gamma$ 3, S $\alpha$  or S $\epsilon$  primers, respectively, followed by

682 Southern-blotting using specific  $S_{\mu}$ ,  $\sigma\delta$ , S $\gamma$ 1, S $\gamma$ 3, S $\alpha$  or S $\epsilon$  probe, as indicated. Data are one representative of 3

683 independent experiments yielding comparable results. **b**, IgD titers in culture (96 h) fluid of *Rad52*<sup>+/+</sup> and *Rad52*<sup>-/-</sup>  
684 <sup>h</sup>B cells stimulated with LPS plus IL-4, as measured by dot-blotting (two-fold serial diluted culture fluid) using a  
685 rat anti-mouse IgD mAb. Data are one representative of 5 independent experiments yielding comparable results.

686 **Fig. 6 | Rad52 deletion ablates *in vivo* S<sub>μ</sub>-σ<sub>δ</sub> DNA recombination and reduces IgD production.** *Rad52*<sup>+/+</sup> and  
687 *Rad52*<sup>-/-</sup> mice were immunized (i.p.) with OVA. **a**, Recombined S<sub>μ</sub>-σ<sub>δ</sub>, S<sub>μ</sub>-S<sub>γ</sub>1, and S<sub>μ</sub>-S<sub>α</sub> DNA in spleen,  
688 mesenteric lymph nodes (MLN) and Peyer's patches B cells, as analyzed by nested long-range PCR using forward  
689 I<sub>μ</sub> and reverse C<sub>δ</sub>, S<sub>γ</sub>1 or S<sub>α</sub> primers, followed by Southern-blotting using specific S<sub>μ</sub>, σ<sub>δ</sub>, S<sub>γ</sub>1 or S<sub>α</sub> probe, as  
690 indicated. Data are one representative of 3 independent experiments yielding comparable results. **b**, S<sub>μ</sub>-σ<sub>δ</sub>, S<sub>μ</sub>-  
691 S<sub>γ</sub>1 and S<sub>μ</sub>-S<sub>α</sub> junctional DNAs were amplified by nested PCR and sequenced using by MiSeq. The length and  
692 numbers of nucleotide overlaps (microhomologies) in S<sub>μ</sub>-σ<sub>δ</sub>, S<sub>μ</sub>-S<sub>γ</sub>1 and S<sub>μ</sub>-S<sub>α</sub> junctional DNAs are shown by  
693 violin plots. Each symbol represents a unique sequence (*n* = 45 per group). **c-f**, Titers of total IgD in serum,  
694 BALF and feces, as analyzed by dot-blotting using rat anti-mouse IgD mAb. Titers of total IgM, IgD, IgG1 and IgA  
695 as well as OVA-binding IgM, IgD, IgG1 and IgA as analyzed by specific ELISAs. Each dot represents data from  
696 one individual mouse (*n* = 5-8 per group, pooled from two experiments). \**p* < 0.05, \*\**p* < 0.01, \*\*\**p* < 0.001, ns: not  
697 significant (unpaired *t* test). **g**, Bacteria-bound IgD and IgA in feces as analyzed by flow cytometry. **h**, IgM, IgD  
698 and IgA positive cells in mesenteric lymph nodes (MLNs) and lamina propria as visualized by fluorescence  
699 microscopy. Data in **g,h** are representative of 3 independent experiments.

700 **Fig. 7 | Rad52 is phosphorylated and recruited to S<sub>μ</sub> and σ<sub>δ</sub> in B cells induced to undergo IgD CSR.** **a**,  
701 C57BL/6 mouse naïve B cells were stimulated with LPS plus IL-4 and cultured for 0, 24, 48, 72 and 96 h. *Rad52*,  
702 *Ku70*, *Ku86* and *Aicda* transcripts were analyzed by real-time qRT-PCR, normalized to *β-Actin* expression and  
703 depicted as relative to the expression in unstimulated B cells (set as 1.0). Data are mean ± SEM of 3 independent  
704 experiments. **b**, Expression of Rad52, phosphorylated Rad52 (p-Rad52), AID, Ku70, Ku86, and *β-Actin* proteins  
705 in mouse B cells stimulated with LPS plus IL-4 (as in **a**), as analyzed by specific immunoblotting. Data are one  
706 representative of 3 independent experiments yielding comparable results. **c**, Human peripheral blood naive B cells  
707 were stimulated with CD154 plus IL-4 and IL-21 and cultured for 0, 24, 48, 72 and 96 h. *RAD52*, *KU70*, *KU86* and  
708 *AICDA* transcripts were analyzed by real-time qRT-PCR, normalized to *β-ACTIN* expression and depicted as  
709 relative to the expression in unstimulated B cells (set as 1.0). Data are mean ± SEM of 3 independent experiments.  
710 **d**, Recruitment of Rad52 to σ<sub>δ</sub> region DNA, as analyzed by ChIP-qPCR assays in mouse *Rad52*<sup>+/+</sup> and *Rad52*<sup>-/-</sup>B  
711 cells stimulated with LPS plus IL-4 and cultured for 72 h. Data are expressed as percent of pre-IP input for each  
712 sample (mean ± SEM). **e,f**, C57BL/6 mouse B cells were stimulated with nil, LPS, LPS plus IL-4 or LPS plus TGF-  
713 β and RA and cultured for 72 h. Recruitment of Rad52 (**e**) and Ku70/Ku86 (**f**) to S<sub>μ</sub>, σ<sub>δ</sub>, S<sub>γ</sub>1, S<sub>γ</sub>3 and S<sub>α</sub> region  
714 DNA, as analyzed by ChIP-qPCR assays. Data are mean ± SEM of 3 independent experiments.

715 **Fig. 8 | Stimuli inducing S<sub>μ</sub>-σ<sub>δ</sub> DNA recombination downregulate ZFP318/Zfp318 in human and mouse B**  
716 **cells.** **a**, C57BL/6 mouse naïve B cells were stimulated with nil, LPS plus IL-4 or LPS plus TGF-β and RA. Surface  
717 expression of IgM and IgD were analyzed 96 h post stimulation by flow cytometry. Expression of *V<sub>H</sub>DJ<sub>H</sub>-C<sub>δ</sub>-m*,  
718 *V<sub>H</sub>DJ<sub>H</sub>-C<sub>δ</sub>-s*, *V<sub>H</sub>DJ<sub>H</sub>-C<sub>μ</sub>-m* and *V<sub>H</sub>DJ<sub>H</sub>-C<sub>μ</sub>-s* transcripts were analyzed 72 h post-stimulation by semi-quantitative

719 RT-PCR using serial two-fold dilution of cDNA templates. Data are representative of 3 independent experiments.  
720 **b**, IgD in supernatant from cultures (96 h) of C57BL/6 mouse naïve B cell stimulated with nil, LPS plus IL-4, LPS  
721 plus TGF- $\beta$  and RA, or CD154 plus IL-4, as analyzed by dot-blotting using rat anti-mouse IgD mAb. Data are  
722 representative of 5 independent experiments. **c**, Expression of *Zfp318* transcripts in mouse naïve B cells  
723 stimulated with nil, LPS plus IL-4, or LPS plus TGF- $\beta$  and RA, as analyzed 72 h post-stimulation by qRT-PCR and  
724 normalized to  $\beta$ -*Actin* expression and depicted relative to the average expression in unstimulated B cells (set as  
725 1). Data are mean  $\pm$  SEM of 3 independent experiments. **d**, Expression of *Zfp318* transcripts in mouse naïve B  
726 cells stimulated with LPS plus IL-4, as analyzed 96 h post-stimulation by mRNA-Seq. Data are mean  $\pm$  SEM of 4  
727 independent experiments. **e**, Zfp318 protein level in mouse naïve B cells stimulated with nil, LPS plus IL-4, or LPS  
728 plus TGF- $\beta$  and RA, as analyzed 96 h post-stimulation by intracellular staining with rabbit anti-Zfp318 Ab in flow  
729 cytometry. Bars on the right panel represent the MFI (mean  $\pm$  SEM) from 3 independent experiments. **f**, Human  
730 blood naïve B cells stimulated with nil, CpG plus IL-2 and IL-21 or CpG plus IL-4 and IL-21. Human *V<sub>H</sub>DJ<sub>H</sub>-C $\delta$ -m*,  
731 *V<sub>H</sub>DJ<sub>H</sub>-C $\delta$ -s*, *V<sub>H</sub>DJ<sub>H</sub>-C $\mu$ -m* and *V<sub>H</sub>DJ<sub>H</sub>-C $\mu$ -s* transcript levels were measured 72 h post-stimulation by semi-  
732 quantitative RT-PCR with serial two-fold dilution of cDNA templates – data are representative of 3 independent  
733 experiments (left panels). Expression of *ZFP318* transcripts as analyzed 72 h post-stimulation by qRT-PCR and  
734 normalized to *HPRT* expression (**f** middle panel) – data are mean  $\pm$  SEM of 3 independent experiments. Secreted  
735 IgD in supernatants of the human B cell cultures, as analyzed 120 h post stimulation by specific ELISA (**f** right  
736 panel) – data are mean  $\pm$  SEM of 4 independent experiments. **g**, Expression of *V<sub>H</sub>DJ<sub>H</sub>-C $\delta$ -m*, *V<sub>H</sub>DJ<sub>H</sub>-C $\delta$ -s*, *V<sub>H</sub>DJ<sub>H</sub>-*  
737 *C $\mu$ -m* and *V<sub>H</sub>DJ<sub>H</sub>-C $\mu$ -s* transcripts in human total IgD<sup>+</sup> tonsil B cells, as analyzed by semi-quantitative RT-PCR  
738 involving serial two-fold dilution of cDNA templates (left panel) – data are representative of 3 independent  
739 experiments. Expression of ZFP318 protein in human tonsil IgM<sup>+</sup>IgD<sup>+</sup>B cells and IgM<sup>-</sup>IgD<sup>+</sup>B cells, as analyzed by  
740 intracellular staining with anti-Zfp318 Ab in flow cytometry (middle panel) – data are representative of 4  
741 independent experiments (mean  $\pm$  SEM, right panel). **h**, Surface expression of IgM and IgD in mouse naïve  
742 *Rad52*<sup>+/+</sup>, *Rad52*<sup>-/-</sup> and *Aicda*<sup>-/-</sup> B cells stimulated with LPS plus IL-4, or LPS plus TGF- $\beta$  and RA, as analyzed 96  
743 h post-stimulation by flow cytometry. Data are representative of 3 independent experiments. **i**, Expression of  
744 *V<sub>H</sub>DJ<sub>H</sub>-C $\delta$ -m* and *V<sub>H</sub>DJ<sub>H</sub>-C $\delta$ -s* transcripts in mouse naïve *Rad52*<sup>+/+</sup> and *Rad52*<sup>-/-</sup> B cells stimulated with nil, LPS  
745 plus IL-4 or LPS plus TGF- $\beta$  and RA, as analyzed 72 h post-stimulation by semi-quantitative RT-PCR using serial  
746 two-fold dilution of cDNA templates. Data are representative of 3 independent experiments. **j**, Rad52 or AID  
747 deficiency does not alter *Zfp318* expression. Expression of *Zfp318* transcripts in mouse naïve *Rad52*<sup>+/+</sup>, *Rad52*<sup>-</sup>  
748 <sup>-/-</sup> and *Aicda*<sup>-/-</sup> B cells stimulated with nil, LPS plus IL-4, or LPS plus TGF- $\beta$  and RA, as analyzed 72 h post-  
749 stimulation by qRT-PCR and normalized to  $\beta$ -*Actin* expression, as depicted relative to expression in unstimulated  
750 B cells (set as 1). Data are mean  $\pm$  SEM of 3 independent experiments.

751 **Fig. 9 | RAD52 is required for S $\mu$ - $\sigma$  $\delta$  DNA recombination in human B cells.** **a**, Human blood naïve IgM<sup>+</sup>IgD<sup>+</sup>B  
752 cells were transfected with specific *RAD52* siRNA or scrambled (Scra) siRNA and stimulated by CpG plus IL-2  
753 and IL-21. Recombined S $\mu$ - $\sigma$  $\delta$  and S $\mu$ -S $\gamma$ 1 DNA in the transfected B cells 120 h after siRNA transfection, as well  
754 as S $\mu$ - $\sigma$  $\delta$  DNA in tonsil IgM<sup>-</sup>IgD<sup>+</sup> and blood naïve IgM<sup>+</sup>IgD<sup>+</sup>B cells were analyzed by nested long-range PCR using  
755 forward I $\mu$  and reverse C $\delta$  or S $\gamma$ 1 primers followed by Southern-blotting using indicated specific probes. Data are



756 from 3 independent experiments. **b**, Expression of *RAD52* and *AICDA* transcripts was analyzed 48 h after siRNA  
757 transfection by qRT-PCR and normalized to *HPRT* expression. Data are mean  $\pm$  SEM of 3 independent  
758 experiments. **c**, Expression of *RAD52* and *AID* proteins were analyzed 72 h after siRNA transfection by specific  
759 immunoblotting. Data are representative of 3 independent experiments. **d**, Expression of *V<sub>H</sub>DJ<sub>H</sub>-C $\delta$ m* and *V<sub>H</sub>DJ<sub>H</sub>-*  
760 *C $\delta$ s* transcripts as analyzed by semi-quantitative RT-PCR with of serial two-fold dilution of cDNA templates. Data  
761 are representative of 3 independent experiments. **e**, *RAD52* is recruited to  $\sigma\delta$  region DNA in human B cells  
762 undergoing CSR to IgD. Recruitment of *RAD52* to  $S\mu$  and  $\sigma\delta$  region DNA in human blood B cells stimulated for  
763 120 h with CpG plus IL-2 and IL-21, as analyzed by specific ChIP-qPCR. Data are mean  $\pm$  SEM of 3 or 4  
764 independent experiments.

765 **Fig. 10 | B cells undergoing CSR to IgD differentiate to IgD-producing plasmablasts/plasma cells.** **a**, Human  
766 B cells stimulated with CpG plus IL-2 and IL-21, which induce IgD CSR, or CpG plus IL-4 and IL-21, which do not  
767 induce IgD CSR. Proportions of CD138<sup>+</sup>IgD<sup>+</sup>IgM<sup>-</sup> plasmablasts/plasma cells among intracellular sIgM<sup>-</sup> IgD<sup>+</sup>B cells  
768 and Blimp1 expression in intracellular IgD<sup>+</sup> sIgM<sup>-</sup> cells, as analyzed 120 h post stimulation by flow cytometry. **b**,  
769 mouse *Rad52*<sup>+/+</sup> and *Rad52*<sup>-/-</sup> B cells stimulated with LPS plus IL-4, which induce IgD CSR. Proportions of  
770 sCD138<sup>+</sup> plasmablasts/plasma cells among intracellular IgD<sup>+</sup> sIgM<sup>-</sup> cells and Blimp1 expression in intracellular  
771 IgD<sup>+</sup> sIgM<sup>-</sup> cells, as analyzed 96 h post stimulation by flow cytometry. Data in **a** and **b** are representative of 3  
772 independent experiments. **c**, Recombined  $S\mu$ - $\sigma\delta$  and  $S\mu$ - $S\alpha$  DNA in two IgD<sup>+</sup> myelomas and one IgA<sup>+</sup> myeloma  
773 as analyzed by nested long-range PCR followed by Southern-blotting using indicated probes.

774 **Fig. 11 | p-Rad52 expression, CSR to IgD and anti-nuclear antigen IgD autoantibodies in lupus mice and**  
775 **patients.** **a**, Concentrations of total, and dsDNA-, RNA-, histone- or RNP/Sm-binding IgD in healthy human  
776 subjects and SLE patients, as analyzed by specific ELISAs. Data are mean  $\pm$  SEM of 6 to 10 healthy subjects or  
777 SLE patients. **b**, Concentrations of total IgD in serum, feces and BALF as analyzed by dot-blotting, and  
778 concentrations of dsDNA- or histone-binding IgD autoantibodies in serum of C57BL/6 and MRL/*Fas*<sup>lpr/lpr</sup> mice as  
779 analyzed by specific ELISAs. Data are mean  $\pm$  SEM of 3 to 9 mice. **c**, IgD concentrations in the serum, BALF and  
780 feces of C57BL/6 and MRL/*Fas*<sup>lpr/lpr</sup> mice, as analyzed by dot-blotting. Shown are dot-blots from one C57BL/6  
781 and one MRL/*Fas*<sup>lpr/lpr</sup> mouse, representative of 3 to 9 C57BL/6 and MRL/*Fas*<sup>lpr/lpr</sup> mice. Expression of *V<sub>H</sub>DJ<sub>H</sub>-*  
782 *C $\delta$ m*, *V<sub>H</sub>DJ<sub>H</sub>-C $\delta$ s*, *V<sub>H</sub>DJ<sub>H</sub>-C $\mu$ m* and *V<sub>H</sub>DJ<sub>H</sub>-C $\mu$ s* transcripts in bone marrow (BM), spleen and mesenteric lymph  
783 nodes (MLNs) as analyzed semi-quantitative RT-PCR in serial two-fold dilutions of cDNA templates. Shown are  
784 RT-PCR data from one C57BL/6 and one MRL/*Fas*<sup>lpr/lpr</sup> mouse, representative of 3 C57BL/6 and 3 MRL/*Fas*<sup>lpr/lpr</sup>  
785 mice. **d**, ANAs as visualized by indirect immunofluorescence on HEp-2 cells that were incubated with sera from  
786 a human healthy subject and a SLE patient or C57BL/6 and MRL/*Fas*<sup>lpr/lpr</sup> mice and revealed using FITC-labeled  
787 rat mAb to mouse IgD. **e**, Bacteria-bound IgD and IgA in feces of C57BL/6 and MRL/*Fas*<sup>lpr/lpr</sup> mice, as analyzed  
788 by flow cytometry. **f**, IgD<sup>+</sup>B cells in lamina propria, MLNs and Peyer's patches of C57BL/6 and MRL/*Fas*<sup>lpr/lpr</sup> mice,  
789 as visualized by fluorescent microscopy. **g**, Recombined  $S\mu$ - $\sigma\delta$ ,  $S\mu$ - $S\gamma$ 1, and  $S\mu$ - $S\alpha$  DNA in bone marrow, spleen,  
790 MLNs and Peyer's patches B cells from C57BL/6 and MRL/*Fas*<sup>lpr/lpr</sup> mice were analyzed by nested long-range  
791 PCR using forward  $I\mu$  and reverse  $C\delta$ ,  $S\gamma$ 1 or  $S\alpha$  primers, followed by Southern-blotting using indicated probes.  
792 Data are representative of 3 independent experiments. **h**,  $S\mu$ - $\sigma\delta$ ,  $S\mu$ - $S\gamma$ 1 and  $S\mu$ - $S\alpha$  junctional DNAs in non-

793 immunized MRL/*Fas*<sup>lpr/lpr</sup> mice, as amplified by nested PCR and sequenced by MiSeq. The length and numbers  
794 of nucleotide overlaps (microhomologies) in S<sub>μ</sub>-σδ, S<sub>μ</sub>-Sγ1 and S<sub>μ</sub>-Sα junctional DNAs are shown by violin plots.  
795 Each dot represents a unique sequence (*n* = 45 per group). **i**, Somatic point-mutations in S<sub>μ</sub> and σδ regions  
796 abetting recombined S<sub>μ</sub>-σδ DNA junctions in IgD class-switched spleen B cells from 3 MRL/*Fas*<sup>lpr/lpr</sup> mice.  
797 Mutations were identified in a 48 to 506 nt stretch of S<sub>μ</sub> or σδ regions in unique S<sub>μ</sub>-σδ DNA recombination  
798 sequences. Each dot represents an individual sequence. In pie charts, the size of slices denotes the proportion  
799 of sequences with the same number of mutations and the grey hue denotes the number of point-mutations per  
800 sequence; below the pie charts is the overall mutation frequency (change/base). \*\**p* < 0.05, \*\**p* < 0.01,  
801 \*\*\**p* < 0.001, ns: not significant (unpaired *t* test). **j**, Expression of *Zfp318* and *Aicda* transcripts in MLNs from non-  
802 immunized C57BL/6 and MRL/*Fas*<sup>lpr/lpr</sup> mice as analyzed by specific qRT-PCR. Data are mean ± SEM of 3  
803 C57BL/6 and 3 MRL/*Fas*<sup>lpr/lpr</sup> mice. **k**, Expression of phosphorylated Rad52 (p-Rad52), Rad52 and β-Actin  
804 proteins in peripheral blood B cells from healthy human subjects and SLE patients as well as B cells from non-  
805 immunized C57BL/6 and MRL/*Fas*<sup>lpr/lpr</sup> mice, as analyzed by specific Western blotting using rabbit anti-p-Rad52  
806 Ab (Y408472, Applied Biological Materials Inc.) or anti-β-Actin mAb (2F1-1, BioLegend). P-Rd52 (Y104) Ab  
807 detected endogenous levels of Rad52 protein only when phosphorylated at tyrosine 104.



## References

- 808  
809  
810  
811  
812  
813  
814  
815  
816  
817  
818  
819  
820  
821  
822  
823  
824  
825  
826  
827  
828  
829  
830  
831  
832  
833  
834  
835  
836  
837  
838  
839  
840  
841  
842  
843  
844  
845  
846  
847  
848  
849  
850  
851  
852  
853  
854  
855  
856  
857  
858  
859  
860
1. Chen, K., Xu, W., Wilson, M., He, B., Miller, N.W., Bengten, E., Edholm, E.S., Santini, P.A., Rath, P., Chiu, A., Cattalini, M., Litzman, J., J. B.B., Huang, B., Meini, A., Riesbeck, K., Cunningham-Rundles, C., Plebani, A. & Cerutti, A. Immunoglobulin D enhances immune surveillance by activating antimicrobial, proinflammatory and B cell-stimulating programs in basophils. *Nat Immunol* **10**, 889-898 (2009).
  2. Chen, K. & Cerutti, A. New insights into the enigma of immunoglobulin D. *Immunol Rev* **237**, 160-179 (2010).
  3. Cerutti, A., Chen, K. & Chorny, A. Immunoglobulin responses at the mucosal interface. *Annu Rev Immunol* **29**, 273-293 (2011).
  4. Chen, K. & Cerutti, A. The function and regulation of immunoglobulin D. *Curr Opin Immunol* **23**, 345-352 (2011).
  5. Choi, J.H., Wang, K.W., Zhang, D., Zhan, X., Wang, T., Bu, C.H., Behrendt, C.L., Zeng, M., Wang, Y., Misawa, T., Li, X., Tang, M., Zhan, X., Scott, L., Hildebrand, S., Murray, A.R., Moresco, E.M., Hooper, L.V. & Beutler, B. IgD class switching is initiated by microbiota and limited to mucosa-associated lymphoid tissue in mice. *Proc Natl Acad Sci U S A* **114**, E1196-E1204 (2017).
  6. Chen, K., Magri, G., Grasset, E.K. & Cerutti, A. Rethinking mucosal antibody responses: IgM, IgG and IgD join IgA. *Nat Rev Immunol* **20**, 427-441 (2020).
  7. Ohta, Y. & Flajnik, M. IgD, like IgM, is a primordial immunoglobulin class perpetuated in most jawed vertebrates. *Proc Natl Acad Sci U S A* **103**, 10723-10728 (2006).
  8. Gutzeit, C., Chen, K. & Cerutti, A. The enigmatic function of IgD: some answers at last. *Eur J Immunol* **48**, 1101-1113 (2018).
  9. Shan, M., Carrillo, J., Yeste, A., Gutzeit, C., Segura-Garzon, D., Walland, A.C., Pybus, M., Grasset, E.K., Yeiser, J.R., Matthews, D.B., van de Veen, W., Comerma, L., He, B., Boonpiyathad, T., Lee, H., Blanco, J., Osborne, L.C., Siracusa, M.C., Akdis, M., Artis, D., Mehandru, S., Sampson, H.A., Berin, M.C., Chen, K. & Cerutti, A. Secreted IgD Amplifies Humoral T Helper 2 Cell Responses by Binding Basophils via Galectin-9 and CD44. *Immunity* **49**, 709-724 (2018).
  10. Enders, A., Short, A., Miosge, L.A., Bergmann, H., Sontani, Y., Bertram, E.M., Whittle, B., Balakishnan, B., Yoshida, K., Sjollem, G., Field, M.A., Andrews, T.D., Hagiwara, H. & Goodnow, C.C. Zinc-finger protein ZFP318 is essential for expression of IgD, the alternatively spliced Igh product made by mature B lymphocytes. *Proc Natl Acad Sci U S A* **111**, 4513-4518 (2014).
  11. Pioli, P.D., Debnath, I., Weis, J.J. & Weis, J.H. Zfp318 regulates IgD expression by abrogating transcription termination within the Ighm/Ighd locus. *J Immunol* **193**, 2546-2553 (2014).
  12. Rouaud, P., Saintamand, A., Saad, F., Carrion, C., Lecardeur, S., Cogne, M. & Denizot, Y. Elucidation of the enigmatic IgD class-switch recombination via germline deletion of the IgH 3' regulatory region. *J Exp Med* **211**, 975-985 (2014).
  13. Kluin, P.M., Kayano, H., Zani, V.J., Kluin-Nelemans, H.C., Tucker, P.W., Satterwhite, E. & Dyer, M.J. IgD class switching: identification of a novel recombination site in neoplastic and normal B cells. *Eur J Immunol* **25**, 3504-3508 (1995).
  14. Arpin, C., de Bouteiller, O., Razanajaona, D., Fugier-Vivier, I., Briere, F., Banchereau, J., Lebecque, S. & Liu, Y.J. The normal counterpart of IgD myeloma cells in germinal center displays extensively mutated IgVH gene, Cm-Cd switch, and lambda light chain expression. *J Exp Med* **187**, 1169-1178 (1998).
  15. Xu, Z., Zan, H., Pone, E.J., Mai, T. & Casali, P. Immunoglobulin class-switch DNA recombination: induction, targeting and beyond. *Nat Rev Immunol* **12**, 517-531 (2012).
  16. Pannunzio, N.R., Watanabe, G. & Lieber, M.R. Nonhomologous DNA end-joining for repair of DNA double-strand breaks. *J Biol Chem* **293**, 10512-10523 (2018).
  17. Wright, W.D., Shah, S.S. & Heyer, W.D. Homologous recombination and the repair of DNA double-strand breaks. *J Biol Chem* **293**, 10524-10535 (2018).
  18. Yan, C.T., Boboila, C., Souza, E.K., Franco, S., Hickernell, T.R., Murphy, M., Gumaste, S., Geyer, M., Zarrin, A.A., Manis, J.P., Rajewsky, K. & Alt, F.W. IgH class switching and translocations use a robust non-classical end-joining pathway. *Nature* **449**, 478-482 (2007).
  19. Boboila, C., Yan, C., Wesemann, D.R., Jankovic, M., Wang, J.H., Manis, J., Nussenzweig, A., Nussenzweig, M. & Alt, F.W. Alternative end-joining catalyzes class switch recombination in the absence of both Ku70 and DNA ligase 4. *J Exp Med* **207**, 417-427 (2010).
  20. Zan, H., Tat, C., Qiu, Z., Taylor, J.R., Guerrero, J.A., Shen, T. & Casali, P. Rad52 competes with Ku70/Ku86 for binding to S-region DSB ends to modulate antibody class-switch DNA recombination. *Nat Commun* **8**, 14244 (2017).
  21. Sallmyr, A. & Tomkinson, A.E. Repair of DNA double-strand breaks by mammalian alternative end-joining pathways. *J Biol Chem* **293**, 10536-10546 (2018).

- 861 22. Bothmer, A., Robbiani, D.F., Feldhahn, N., Gazumyan, A., Nussenzweig, A. & Nussenzweig, M.C. 53BP1 regulates  
862 DNA resection and the choice between classical and alternative end joining during class switch recombination. *J Exp*  
863 *Med* **207**, 855-865 (2010).
- 864 23. Bothmer, A., Robbiani, D.F., Di Virgilio, M., Bunting, S.F., Klein, I.A., Feldhahn, N., Barlow, J., Chen, H.T., Bosque,  
865 D., Callen, E., Nussenzweig, A. & Nussenzweig, M.C. Regulation of DNA end joining, resection, and immunoglobulin  
866 class switch recombination by 53BP1. *Mol Cell* **42**, 319-329 (2011).
- 867 24. Marini, F., Rawal, C.C., Liberi, G. & Pelliccioli, A. Regulation of DNA Double Strand Breaks Processing: Focus on  
868 Barriers. *Front Mol Biosci* **6**, 55 (2019).
- 869 25. Pone, E.J., Zhang, J., Mai, T., White, C.A., Li, G., Sakakura, J.K., Patel, P.J., Al-Qahtani, A., Zan, H., Xu, Z. & Casali,  
870 P. BCR-signalling synergizes with TLR-signalling for induction of AID and immunoglobulin class-switching through  
871 the non-canonical NF-kappaB pathway. *Nat Commun* **3**, 767 (2012).
- 872 26. Wu, X., Tsai, C.Y., Patam, M.B., Zan, H., Chen, J.P., Lipkin, S.M. & Casali, P. A role for the MutL mismatch repair  
873 Mlh3 protein in immunoglobulin class switch DNA recombination and somatic hypermutation. *J Immunol* **176**, 5426-  
874 5437 (2006).
- 875 27. Sanchez, H.N., Moroney, J.B., Gan, H., Shen, T., Im, J.L., Li, T., Taylor, J.R., Zan, H. & Casali, P. B cell-intrinsic  
876 epigenetic modulation of antibody responses by dietary fiber-derived short-chain fatty acids. *Nat Commun* **11**, 60 (2020).
- 877 28. Honda, M., Okuno, Y., Yoo, J., Ha, T. & Spies, M. Tyrosine phosphorylation enhances RAD52-mediated annealing by  
878 modulating its DNA binding. *EMBO J* **30**, 3368-3382 (2011).
- 879 29. Kantor, G.L., Van Herle, A.J. & Barnett, E.V. Auto-antibodies of the IgD class. *Clin Exp Immunol* **6**, 951-962 (1970).
- 880 30. Wu, Y., Chen, W., Chen, H., Zhang, L., Chang, Y., Yan, S., Dai, X., Ma, Y., Huang, Q. & Wei, W. The elevated secreted  
881 immunoglobulin D enhanced the activation of peripheral blood mononuclear cells in rheumatoid arthritis. *PLoS One* **11**,  
882 e0147788 (2016).
- 883 31. Drenth, J.P., Cuisset, L., Grateau, G., Vasseur, C., van de Velde-Visser, S.D., de Jong, J.G., Beckmann, J.S., van der  
884 Meer, J.W. & Delpech, M. Mutations in the gene encoding mevalonate kinase cause hyper-IgD and periodic fever  
885 syndrome. International Hyper-IgD Study Group. *Nat Genet* **22**, 178-181 (1999).
- 886 32. Hager, E.J., Tse, H.M., Piganelli, J.D., Gupta, M., Baetscher, M., Tse, T.E., Pappu, A.S., Steiner, R.D., Hoffmann, G.F.  
887 & Gibson, K.M. Deletion of a single mevalonate kinase (Mvk) allele yields a murine model of hyper-IgD syndrome. *J*  
888 *Inherit Metab Dis* **30**, 888-895 (2007).
- 889 33. Ammouri, W., Cuisset, L., Rouaghe, S., Rolland, M.O., Delpech, M., Grateau, G. & Ravet, N. Diagnostic value of serum  
890 immunoglobulinaemia D level in patients with a clinical suspicion of hyper IgD syndrome. *Rheumatology (Oxford)* **46**,  
891 1597-1600 (2007).
- 892 34. Govindaraj, G.M., Jain, A., Peethambaran, G., Bhojar, R.C., Vellarikkal, S.K., Ganapati, A., Sandhya, P.,  
893 Edavazhippurath, A., Dhanasooraj, D., Puthenpurayil, J.M., Chakkiyar, K., Mishra, A., Batra, A., Punnen, A., Kumar,  
894 S., Sivasubbu, S. & Scaria, V. Spectrum of clinical features and genetic variants in mevalonate kinase (MVK) gene of  
895 South Indian families suffering from Hyperimmunoglobulin D Syndrome. *PLoS One* **15**, e0237999 (2020).
- 896 35. Koelsch, K., Zheng, N.Y., Zhang, Q., Duty, A., Helms, C., Mathias, M.D., Jared, M., Smith, K., Capra, J.D. & Wilson,  
897 P.C. Mature B cells class switched to IgD are autoreactive in healthy individuals. *J Clin Invest* **117**, 1558-1565 (2007).
- 898 36. Rijkers, T., Van Den Ouweland, J., Morolli, B., Rolink, A.G., Baarends, W.M., Van Sloun, P.P., Lohman, P.H. & Pastink,  
899 A. Targeted inactivation of mouse RAD52 reduces homologous recombination but not resistance to ionizing radiation.  
900 *Mol Cell Biol* **18**, 6423-6429 (1998).
- 901 37. Sung, P. Function of yeast Rad52 protein as a mediator between replication protein A and the Rad51 recombinase. *J Biol*  
902 *Chem* **272**, 28194-28197 (1997).
- 903 38. Symington, L.S., Rothstein, R. & Lisby, M. Mechanisms and regulation of mitotic recombination in *Saccharomyces*  
904 *cerevisiae*. *Genetics* **198**, 795-835 (2014).
- 905 39. Song, B. & Sung, P. Functional interactions among yeast Rad51 recombinase, Rad52 mediator, and replication protein  
906 A in DNA strand exchange. *J Biol Chem* **275**, 15895-15904 (2000).
- 907 40. Sung, P., Trujillo, K.M. & Van Komen, S. Recombination factors of *Saccharomyces cerevisiae*. *Mutat Res* **451**, 257-275  
908 (2000).
- 909 41. Seong, C., Colavito, S., Kwon, Y., Sung, P. & Krejci, L. Regulation of Rad51 recombinase presynaptic filament assembly  
910 via interactions with the Rad52 mediator and the Srs2 anti-recombinase. *J Biol Chem* **284**, 24363-24371 (2009).
- 911 42. Wilson, P.F., Hinz, J.M., Urbin, S.S., Nham, P.B. & Thompson, L.H. Influence of homologous recombinational repair  
912 on cell survival and chromosomal aberration induction during the cell cycle in gamma-irradiated CHO cells. *DNA Repair*  
913 **9**, 737-744 (2010).

- 914 43. Du, L.Q., Wang, Y., Wang, H., Cao, J., Liu, Q. & Fan, F.Y. Knockdown of Rad51 expression induces radiation- and  
915 chemo-sensitivity in osteosarcoma cells. *Med Oncol* **28**, 1481-1487 (2011).
- 916 44. Thorslund, T., McIlwraith, M.J., Compton, S.A., Lekomtsev, S., Petronczki, M., Griffith, J.D. & West, S.C. The breast  
917 cancer tumor suppressor BRCA2 promotes the specific targeting of RAD51 to single-stranded DNA. *Nat Struct Mol Biol*  
918 **17**, 1263-1265 (2010).
- 919 45. Kwon, Y. & Sung, P. Rad52, maestro of inverse strand exchange. *Mol Cell* **67**, 1-3 (2017).
- 920 46. Feng, Z., Scott, S.P., Bussen, W., Sharma, G.G., Guo, G., Pandita, T.K. & Powell, S.N. Rad52 inactivation is  
921 synthetically lethal with BRCA2 deficiency. *Proc Natl Acad Sci U S A* **108**, 686-691 (2011).
- 922 47. Ma, C.J., Kwon, Y., Sung, P. & Greene, E.C. Human RAD52 interactions with replication protein A and the RAD51  
923 presynaptic complex. *J Biol Chem* **292**, 11702-11713 (2017).
- 924 48. Symington, L.S. Role of RAD52 epistasis group genes in homologous recombination and double-strand break repair.  
925 *Microbiol Mol Biol Rev* **66**, 630-670 (2002).
- 926 49. Ciccia, A. & Symington, L.S. Stressing Out About RAD52. *Mol Cell* **64**, 1017-1019 (2016).
- 927 50. Truong, L.N., Li, Y., Shi, L.Z., Hwang, P.Y., He, J., Wang, H., Razavian, N., Berns, M.W. & Wu, X. Microhomology-  
928 mediated End Joining and Homologous Recombination share the initial end resection step to repair DNA double-strand  
929 breaks in mammalian cells. *Proc Natl Acad Sci U S A* **110**, 7720-7725 (2013).
- 930 51. Abayasingam, A., Balachandran, H., Agapiou, D., Hammoud, M., Rodrigo, C., Keoshkerian, E., Li, H., Brasher, N.A.,  
931 Christ, D., Rouet, R., Burnet, D., Grubor-Bauk, B., Rawlinson, W., Turville, S., Aggarwal, A., Stella, A.O., Fichter, C.,  
932 Brilot, F., Mina, M., Post, J.J., Hudson, B., Gilroy, N., Dwyer, D., Sasson, S.C., Tea, F., Pilli, D., Kelleher, A., Tedla,  
933 N., Lloyd, A.R., Martinello, M., Bull, R.A. & Group, C.S. Long-term persistence of RBD(+) memory B cells encoding  
934 neutralizing antibodies in SARS-CoV-2 infection. *Cell Rep Med* **2**, 100228 (2021).
- 935 52. Waters, L.R., Ahsan, F.M., Ten Hoeve, J., Hong, J.S., Kim, D.N.H., Minasyan, A., Braas, D., Graeber, T.G., Zangle,  
936 T.A. & Teitell, M.A. Ampk regulates IgD expression but not energy stress with B cell activation. *Sci Rep* **9**, 8176 (2019).
- 937 53. Sag, D., Carling, D., Stout, R.D. & Suttles, J. Adenosine 5'-monophosphate-activated protein kinase promotes  
938 macrophage polarization to an anti-inflammatory functional phenotype. *J Immunol* **181**, 8633-8641 (2008).
- 939 54. Moskophidis, D., Moskophidis, M. & Lohler, J. Virus-specific IgD in acute viral infection of mice. *J Immunol* **158**, 1254-  
940 1261 (1997).
- 941 55. Forsgren, A., Brant, M., Mollenkvist, A., Muyombwe, A., Janson, H., Woin, N. & Riesbeck, K. Isolation and  
942 characterization of a novel IgD-binding protein from *Moraxella catarrhalis*. *J Immunol* **167**, 2112-2120 (2001).
- 943 56. Min, J.Y., Nayak, J.V., Hulse, K.E., Stevens, W.W., Raju, P.A., Huang, J.H., Suh, L.A., Van Roey, G.A., Norton, J.E.,  
944 Carter, R.G., Price, C.P.E., Weibman, A.R., Rahan, A.R., Ghosh, E.E., Patel, Z.M., Homma, T., Conley, D.B., Welch,  
945 K.C., Shintani-Smith, S., Peters, A.T., Grammer, L.C., 3rd, Harris, K.E., Kato, A., Hwang, P.H., Kern, R.C., Herzenberg,  
946 L.A., Schleimer, R.P. & Tan, B.K. Evidence for altered levels of IgD in the nasal airway mucosa of patients with chronic  
947 rhinosinusitis. *J Allergy Clin Immunol* **140**, 1562-1571 (2017).
- 948 57. Casali, P. & Notkins, A.L. Probing the human B-cell repertoire with EBV: polyreactive antibodies and CD5+ B  
949 lymphocytes. *Annu Rev Immunol* **7**, 513-535 (1989).
- 950 58. Ikematsu, H., Kasaian, M.T., Schettino, E.W. & Casali, P. Structural analysis of the VH-D-JH segments of human  
951 polyreactive IgG mAb. Evidence for somatic selection. *J Immunol* **151**, 3604-3616 (1993).
- 952 59. Ichiyoshi, Y. & Casali, P. Analysis of the structural correlates for antibody polyreactivity by multiple reassortments of  
953 chimeric human immunoglobulin heavy and light chain V segments. *J Exp Med* **180**, 885-895 (1994).
- 954 60. Casali, P. & Schettino, E.W. Structure and function of natural antibodies. *Curr Top Microbiol Immunol* **210**, 167-179  
955 (1996).
- 956 61. Sabouri, Z., Perotti, S., Spierings, E., Humburg, P., Yabas, M., Bergmann, H., Horikawa, K., Roots, C., Lambe, S.,  
957 Young, C., Andrews, T.D., Field, M., Enders, A., Reed, J.H. & Goodnow, C.C. IgD attenuates the IgM-induced energy  
958 response in transitional and mature B cells. *Nat Commun* **7**, 13381 (2016).
- 959 62. Guo, L., Tian, J., Guo, Z., Zheng, B. & Han, S. The absence of immunoglobulin D B cell receptor-mediated signals  
960 promotes the production of autoantibodies and exacerbates glomerulonephritis in murine lupus. *Clin Exp Immunol* **164**,  
961 227-235 (2011).
- 962 63. Houten, S.M., Kuis, W., Duran, M., de Koning, T.J., van Royen-Kerkhof, A., Romeijn, G.J., Frenkel, J., Dorland, L., de  
963 Barse, M.M., Huijbers, W.A., Rijkers, G.T., Waterham, H.R., Wanders, R.J. & Poll-The, B.T. Mutations in MVK,  
964 encoding mevalonate kinase, cause hyperimmunoglobulinaemia D and periodic fever syndrome. *Nat Genet* **22**, 175-177  
965 (1999).

- 966 64. Muramatsu, M., Kinoshita, K., Fagarasan, S., Yamada, S., Shinkai, Y. & Honjo, T. Class switch recombination and  
967 hypermutation require activation-induced cytidine deaminase (AID), a potential RNA editing enzyme. *Cell* **102**, 553-  
968 563 (2000).
- 969 65. Park, S.-R., Zan, H., Zhang, J., Al-Qahtani, A., Pone, E.J., Xu, Z., Mai, T. & Casali, P. HoxC4 binds to the promoter of  
970 the cytidine deaminase AID gene to induce AID expression, class-switch DNA recombination and somatic  
971 hypermutation. *Nat Immunol* **10**, 540-550 (2009).
- 972 66. White, C.A., Pone, E.J., Lam, T., Tat, C., Hayama, K.L., Li, G., Zan, H. & Casali, P. Histone deacetylase inhibitors  
973 upregulate B cell microRNAs that silence AID and Blimp-1 expression for epigenetic modulation of antibody and  
974 autoantibody responses. *J Immunol* **193**, 5933-5950 (2014).
- 975 67. Zan, H., Zhang, J., Al-Qahtani, A., Pone, E.J., White, C.A., Lee, D., Yel, L., Mai, T. & Casali, P. Endonuclease G plays  
976 a role in immunoglobulin class switch DNA recombination by introducing double-strand breaks in switch regions. *Mol*  
977 *Immunol* **48**, 610-622 (2011).
- 978 68. Xu, Z., Fulop, Z., Wu, G., Pone, E.J., Zhang, J., Mai, T., Thomas, L.M., Al-Qahtani, A., White, C.A., Park, S.R.,  
979 Steinacker, P., Li, Z., Yates, J., 3rd, Herron, B., Otto, M., Zan, H., Fu, H. & Casali, P. 14-3-3 adaptor proteins recruit  
980 AID to 5'-AGCT-3'-rich switch regions for class switch recombination. *Nat Struct Mol Biol* **17**, 1124-1135 (2010).
- 981 69. Zan, H., White, C.A., Thomas, L.M., Mai, T., Li, G., Xu, Z., Zhang, J. & Casali, P. Rev1 recruits Ung to switch regions  
982 and enhances dU glycosylation for immunoglobulin class switch DNA recombination. *Cell Rep* **2**, 1220-1232 (2012).
- 983 70. Li, G., White, C.A., Lam, T., Pone, E.J., Tran, D.C., Hayama, K.L., Zan, H., Xu, Z. & Casali, P. Combinatorial  
984 H3K9acS10ph histone modification in IgH locus S regions targets 14-3-3 adaptors and AID to specify antibody class-  
985 switch DNA recombination. *Cell Rep* **5**, 702-714 (2013).



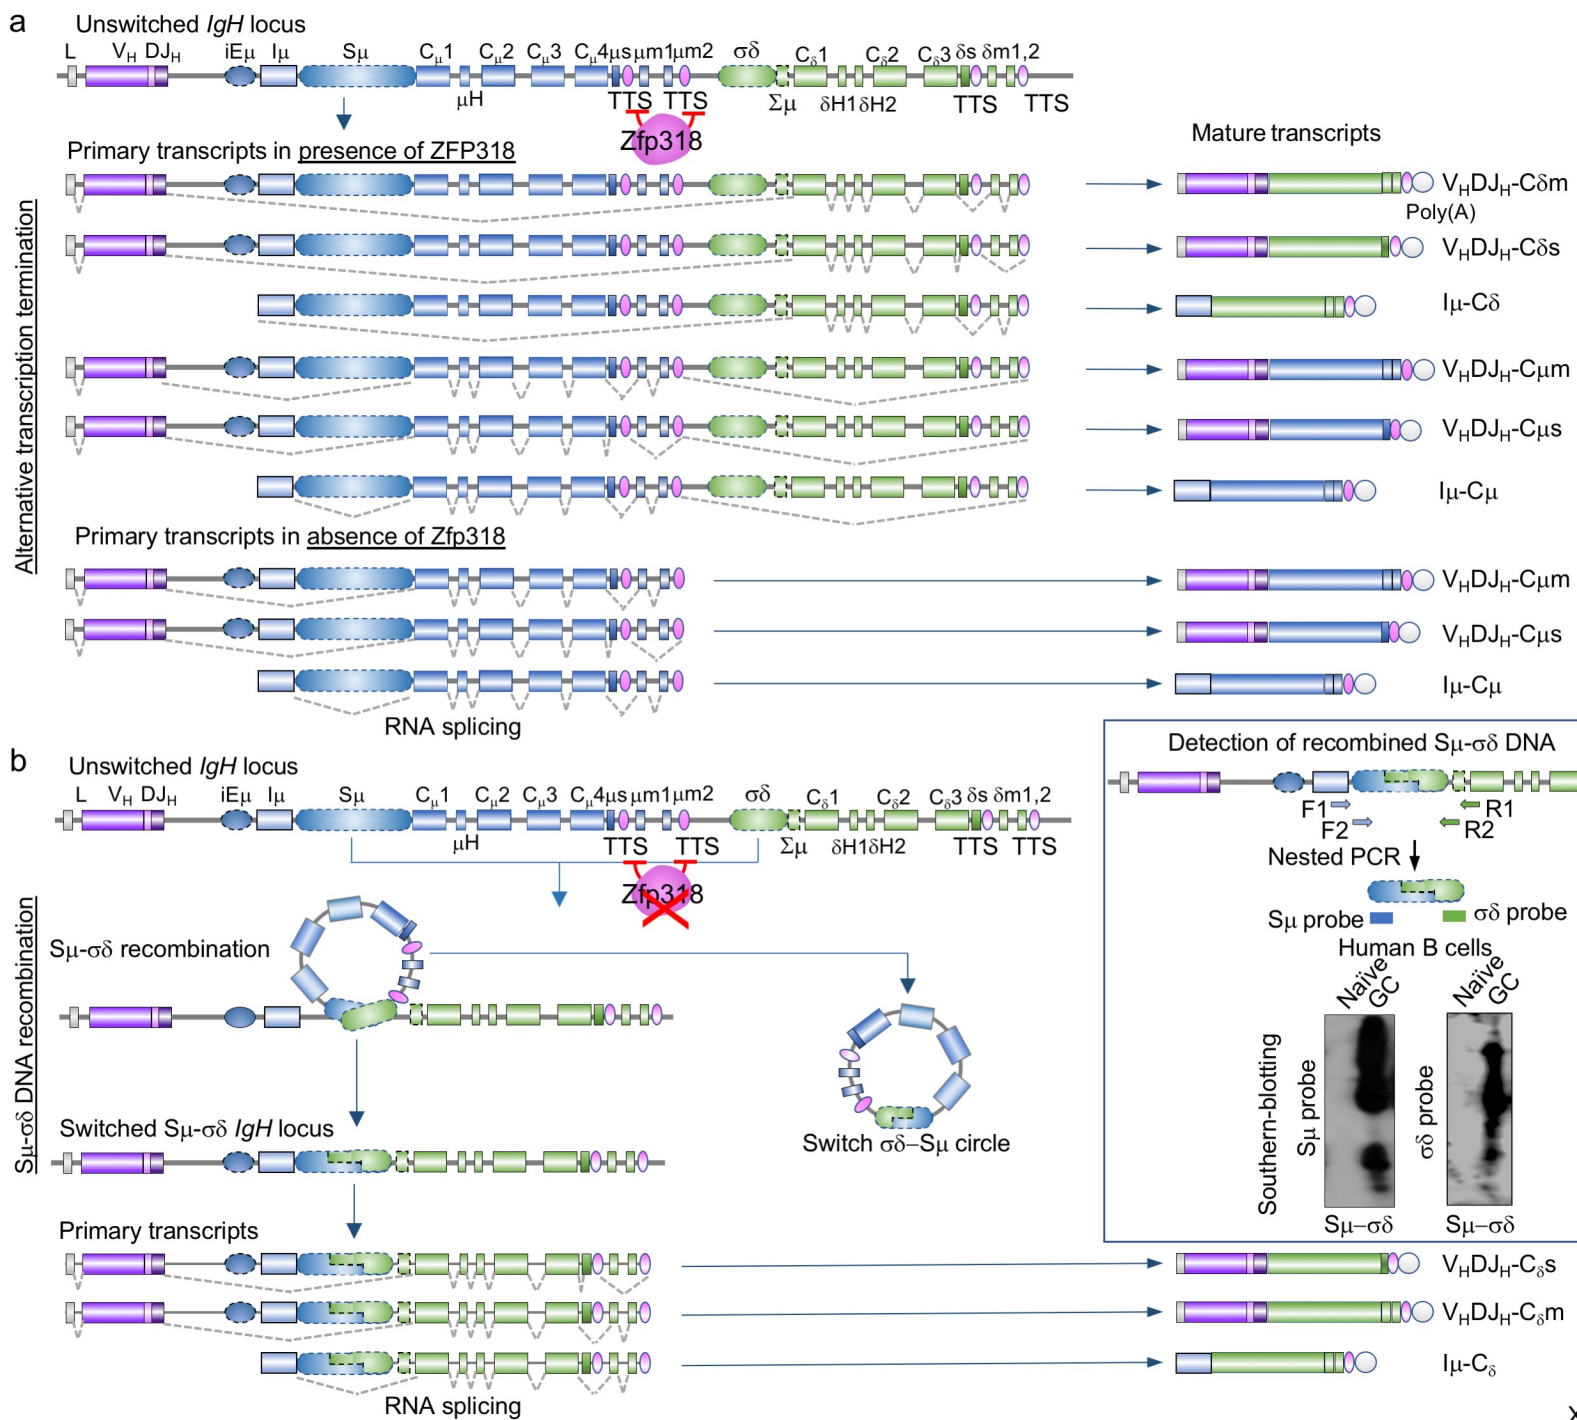

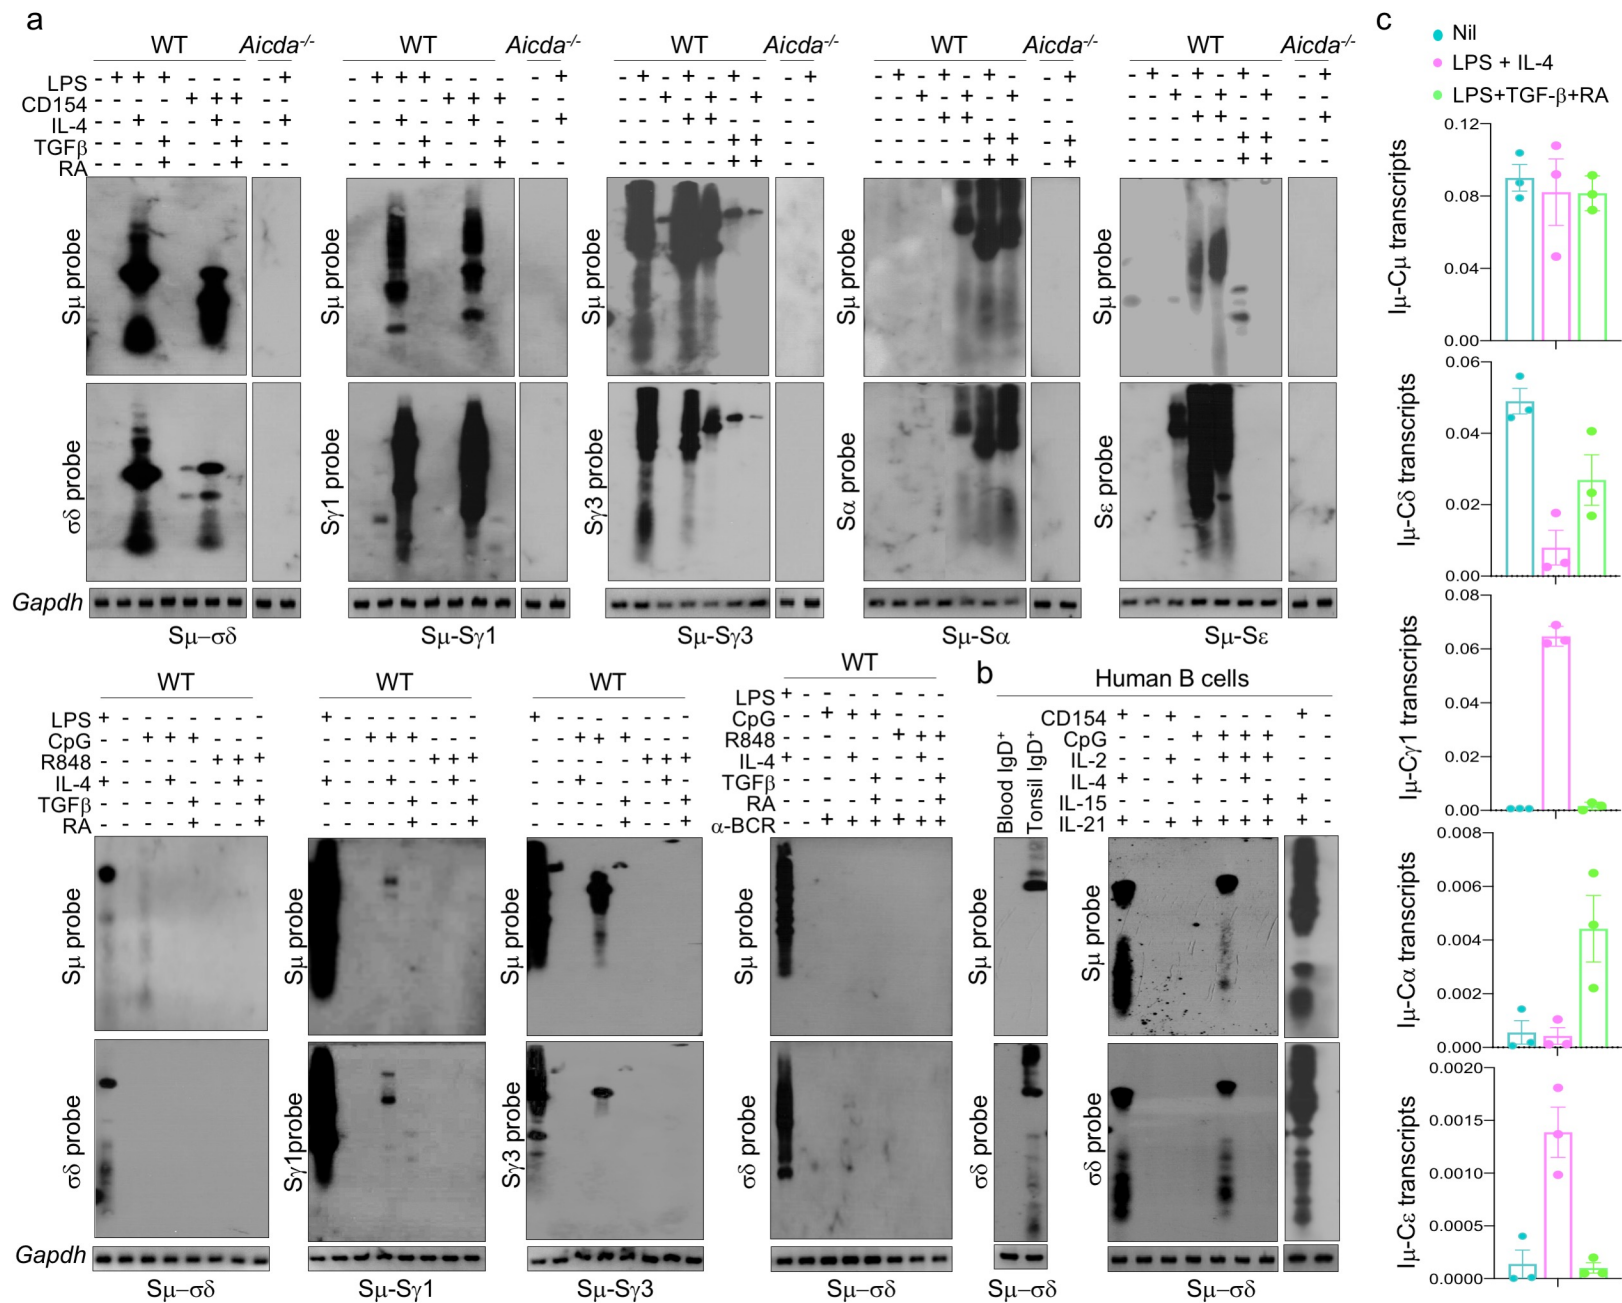

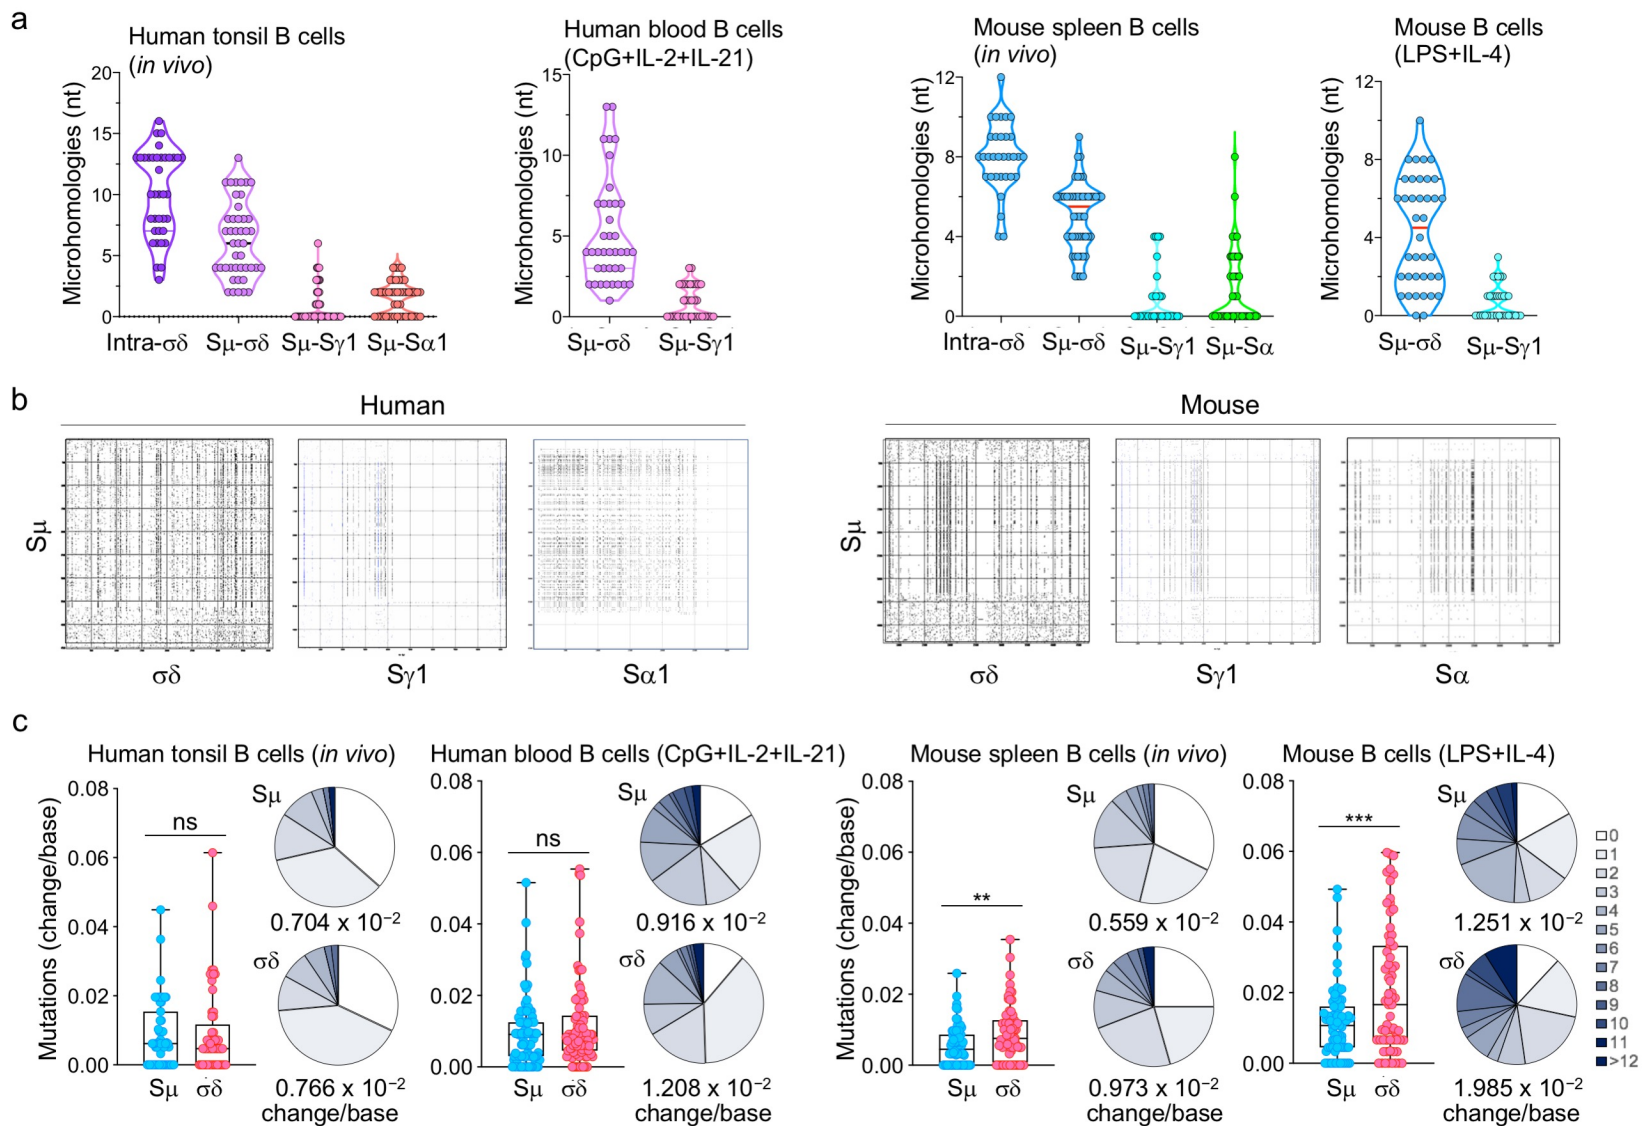







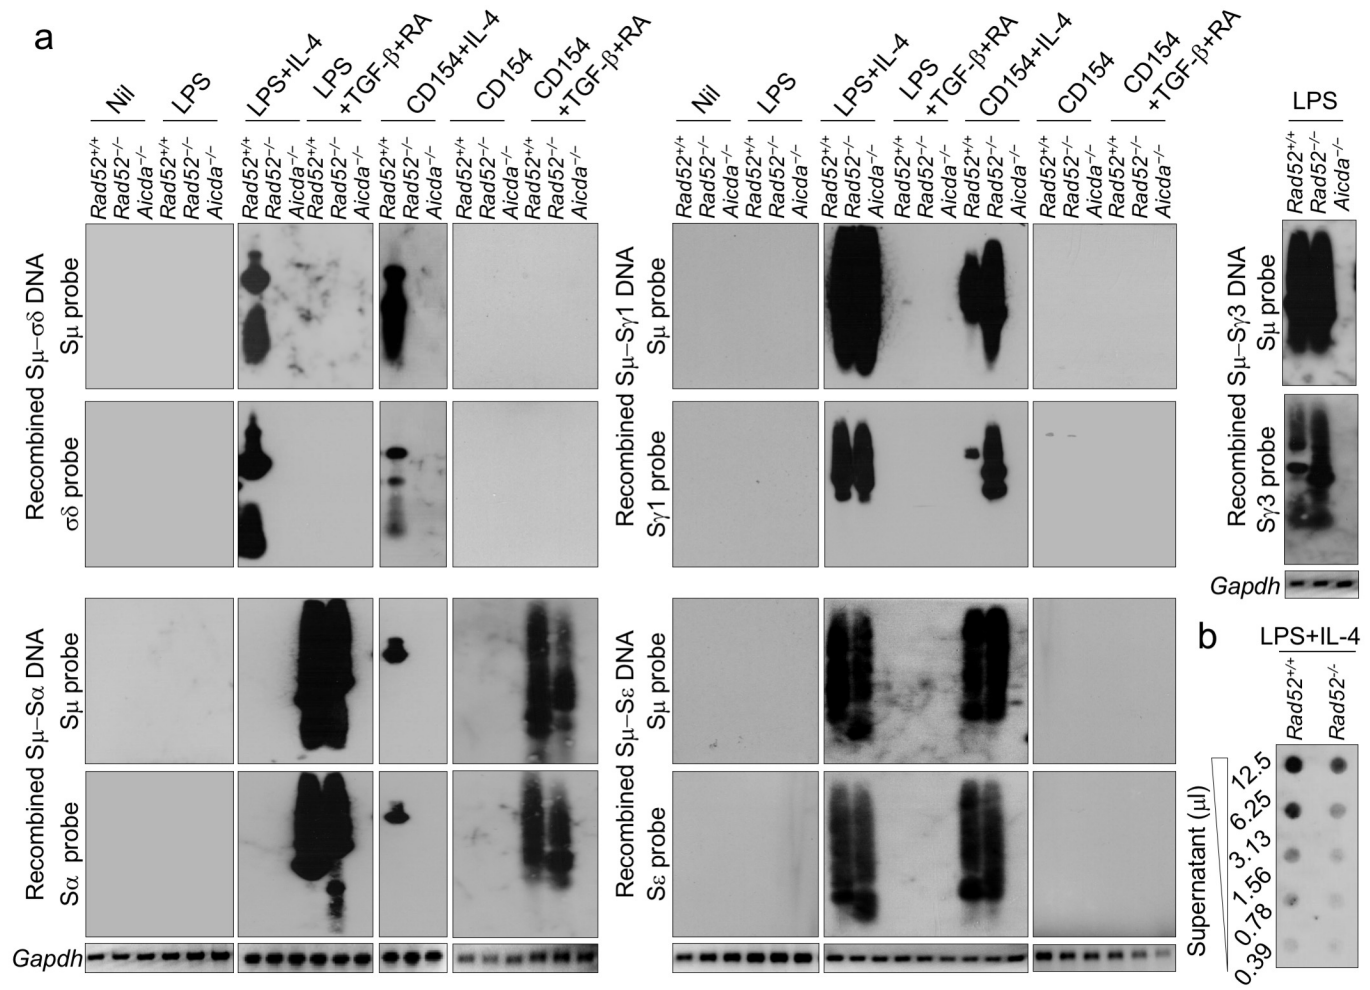

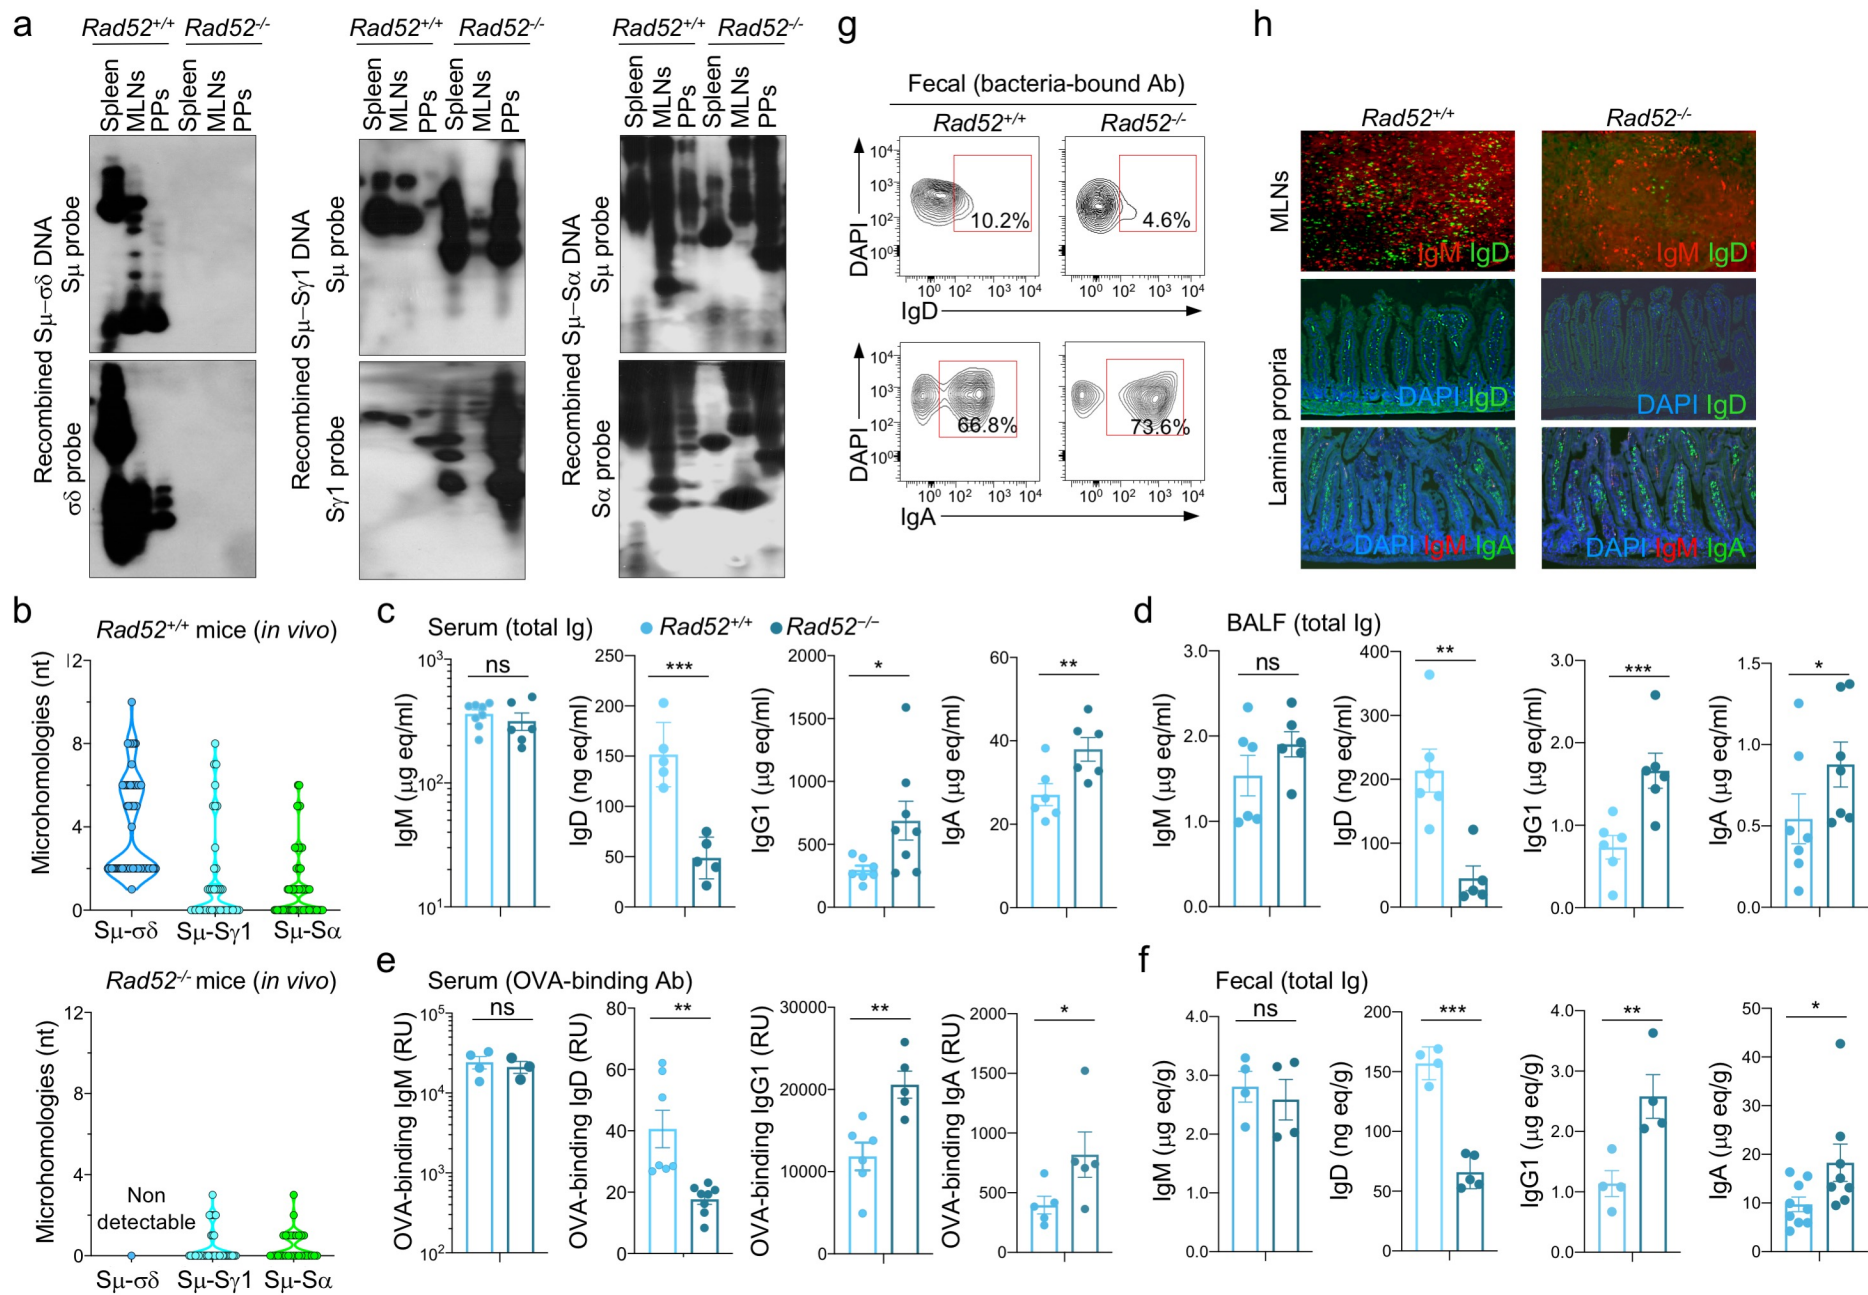

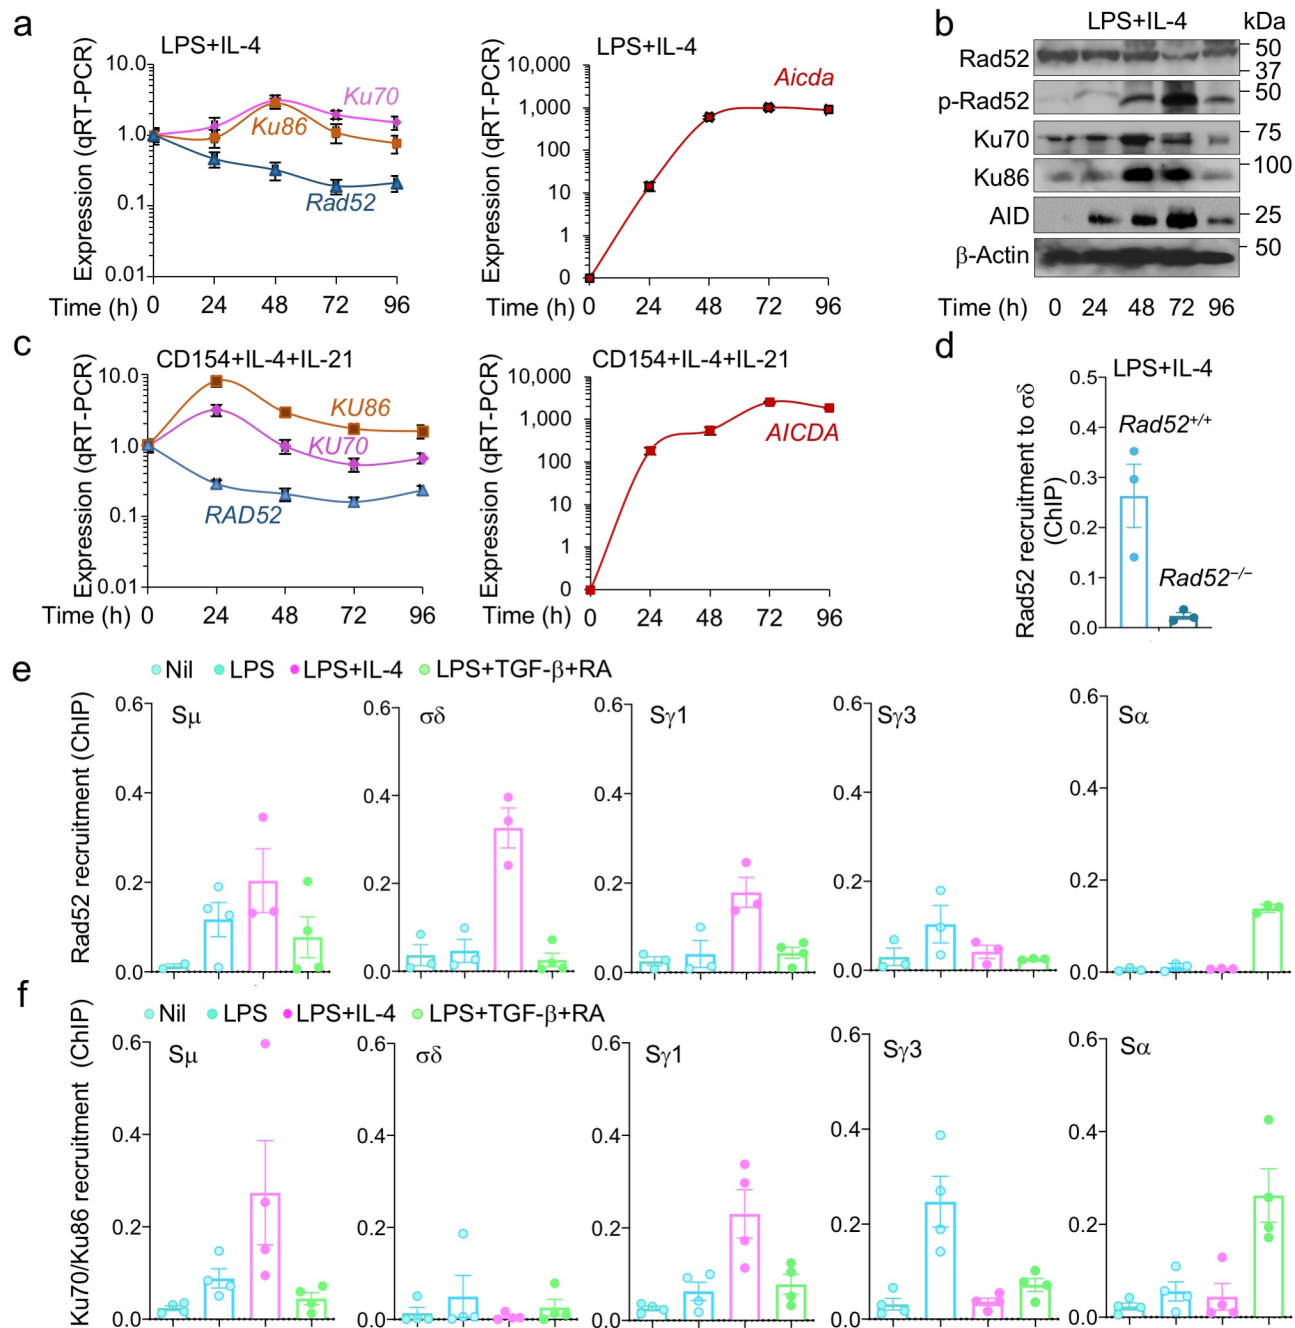

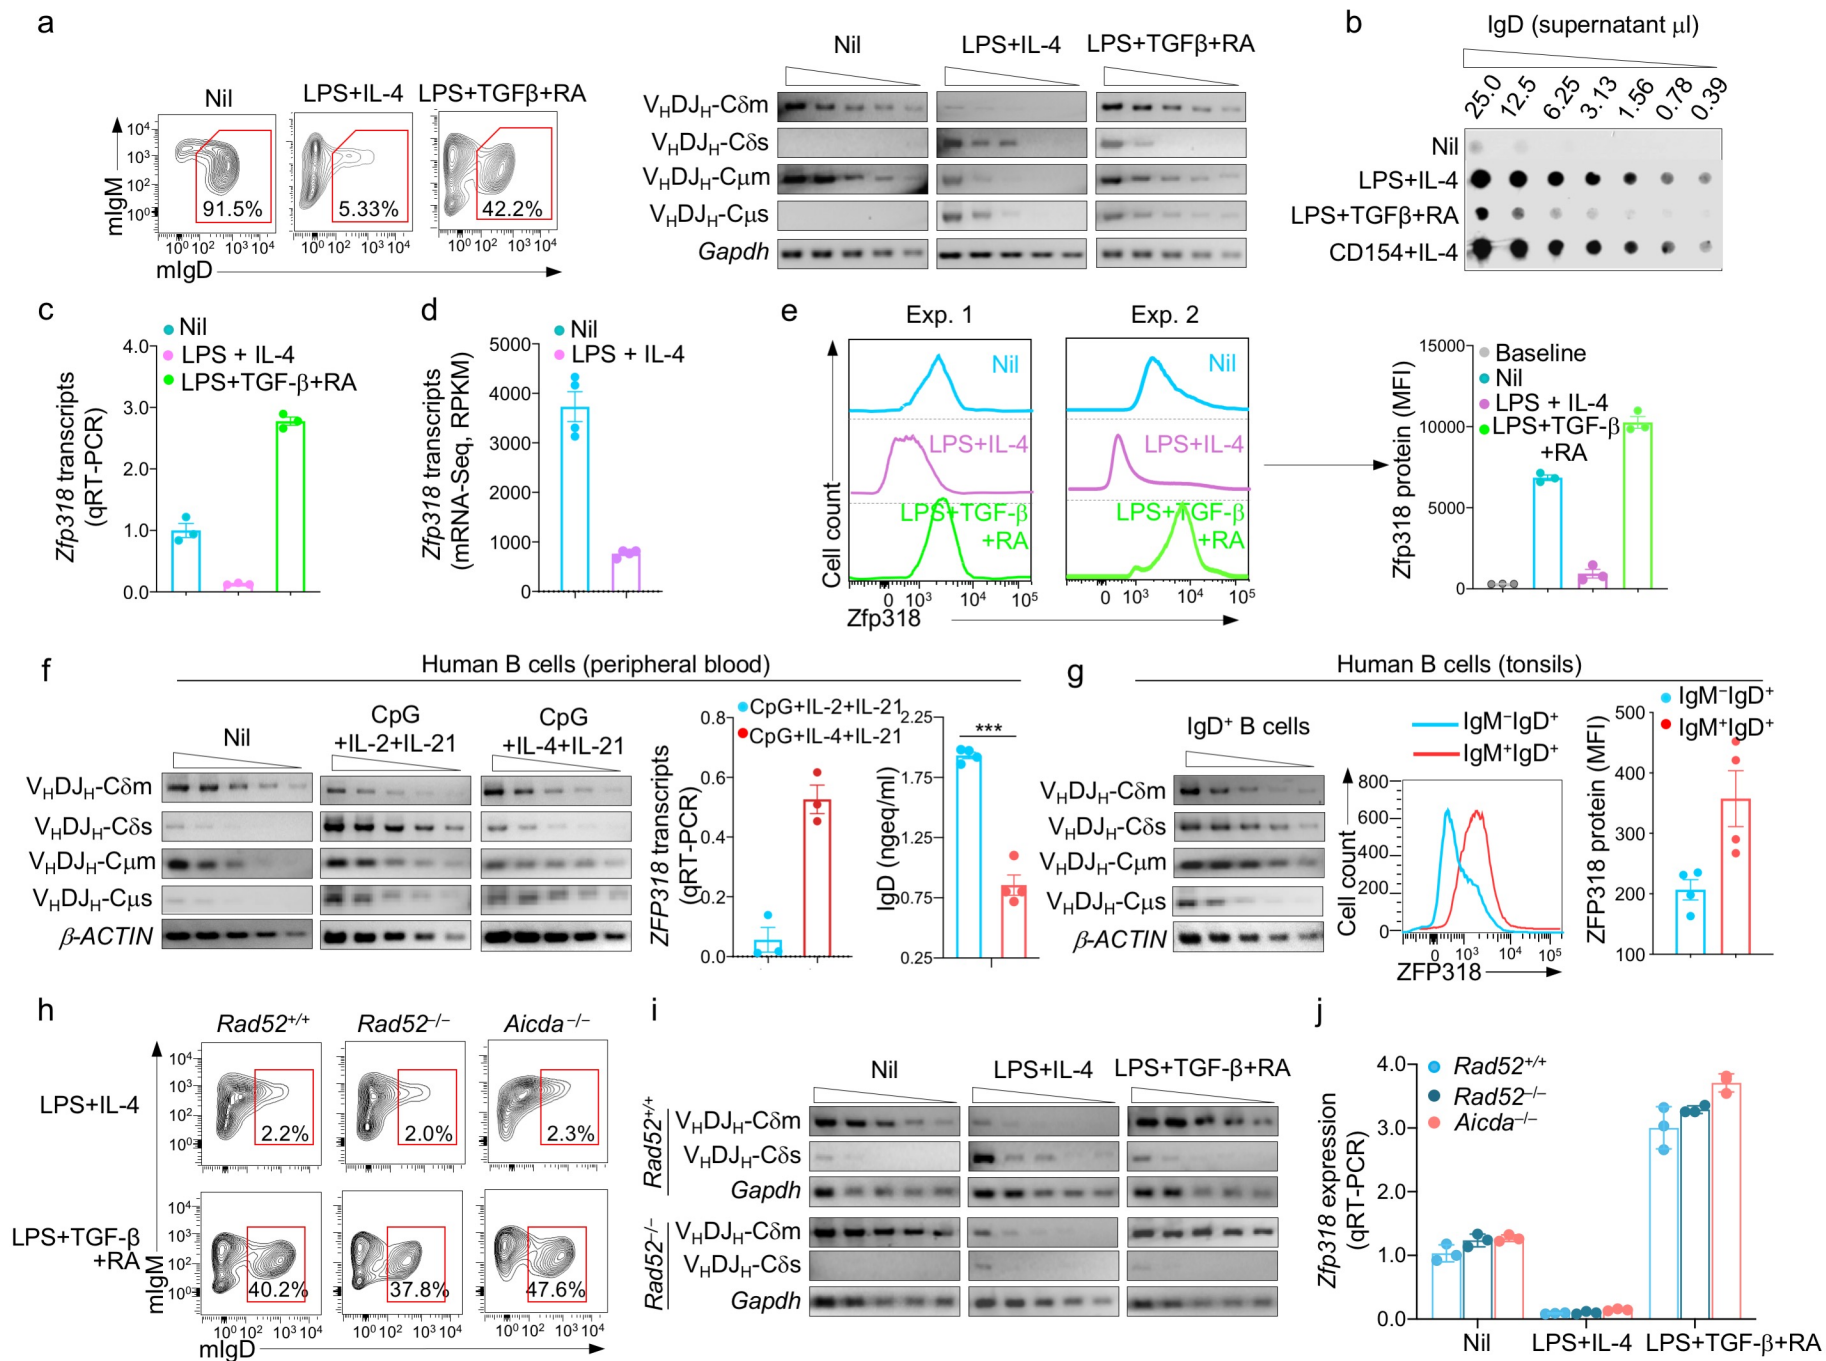



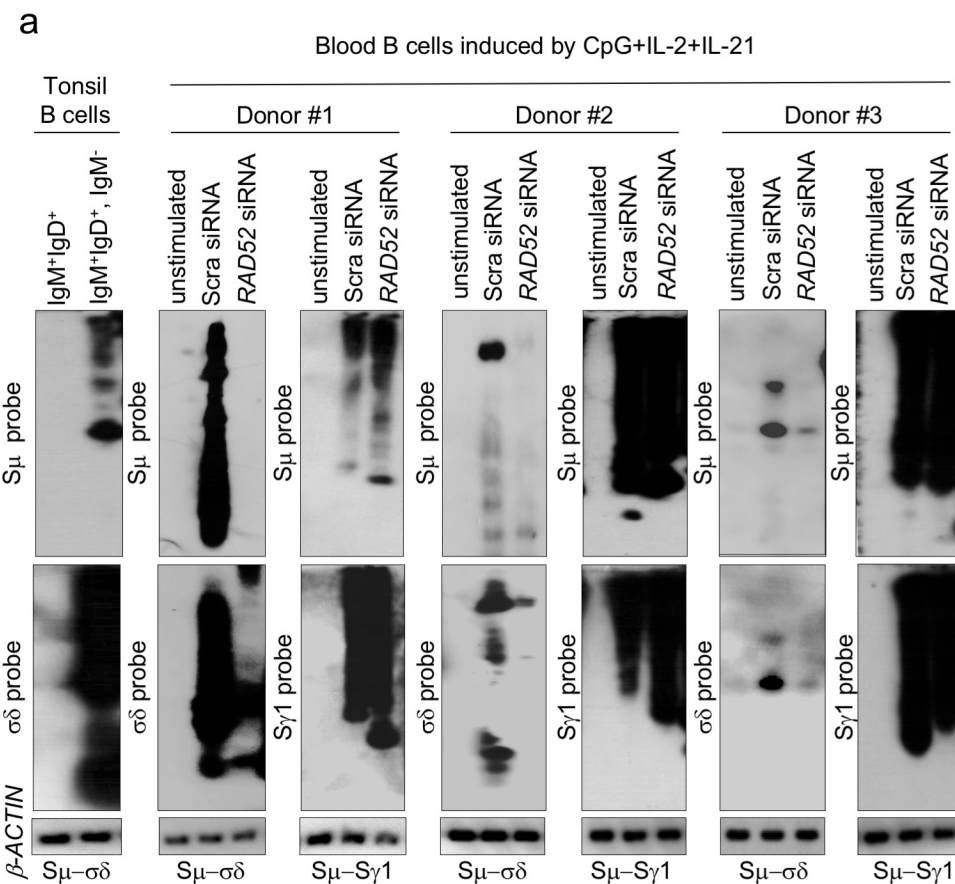

**b** Blood B cells induced by CpG+IL-2+IL-21

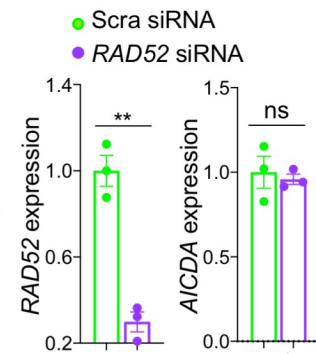

**d**

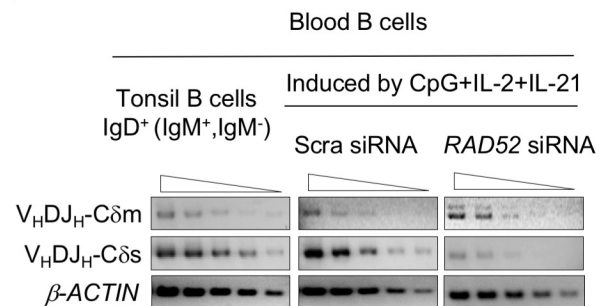

**c** Blood B cells (CpG+IL-2+IL-21)

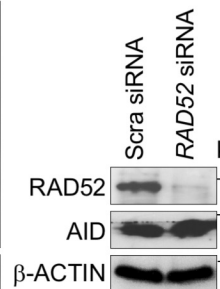

**e**

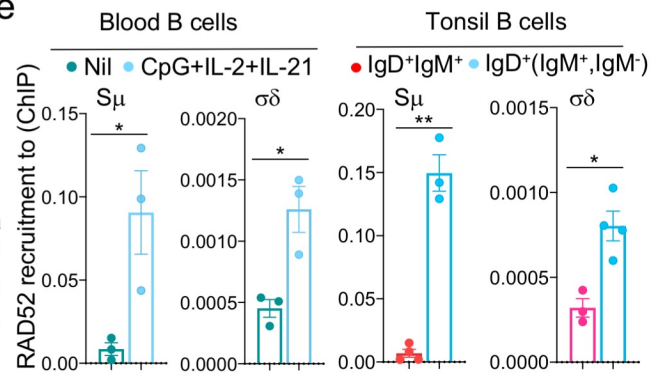

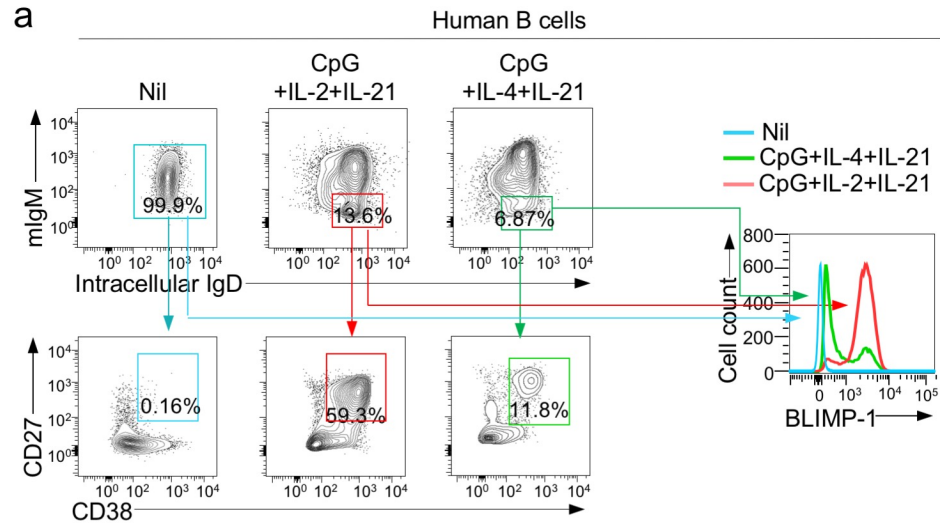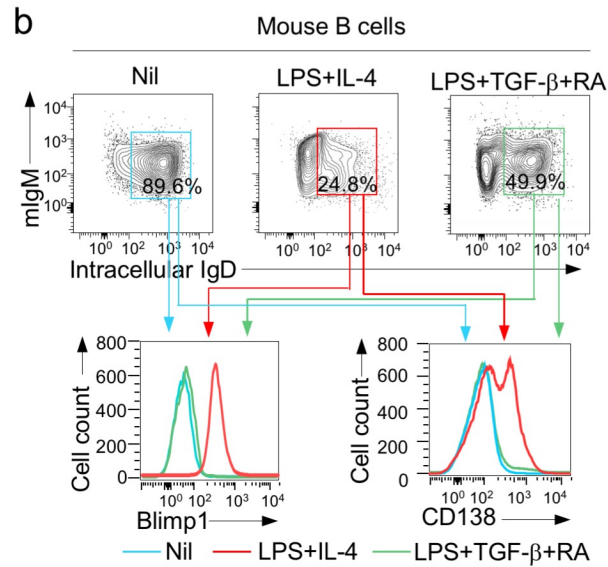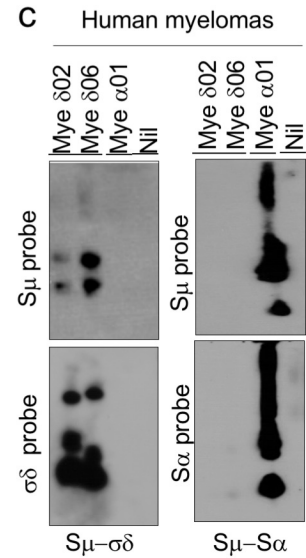

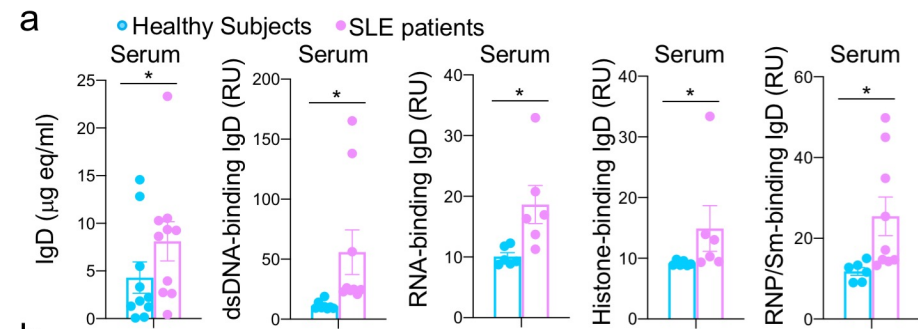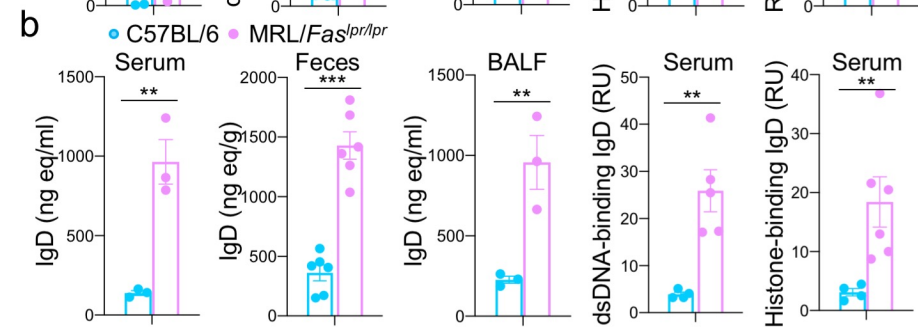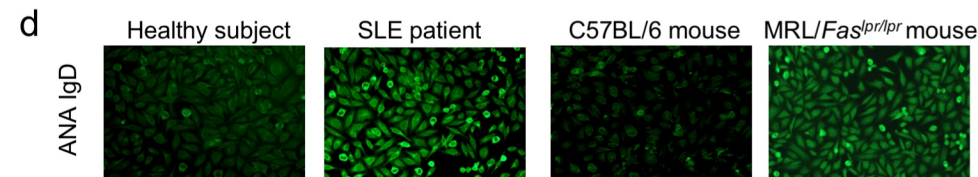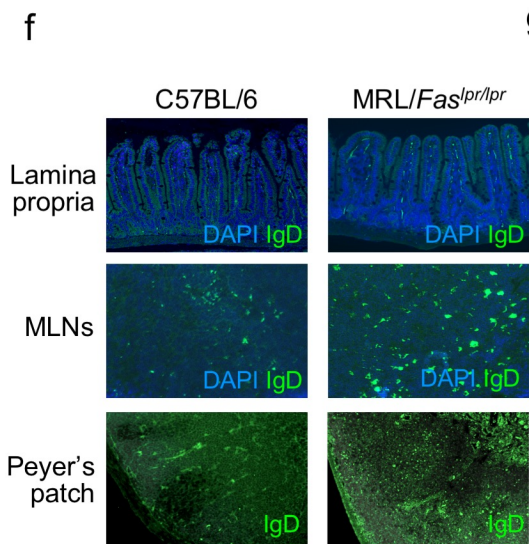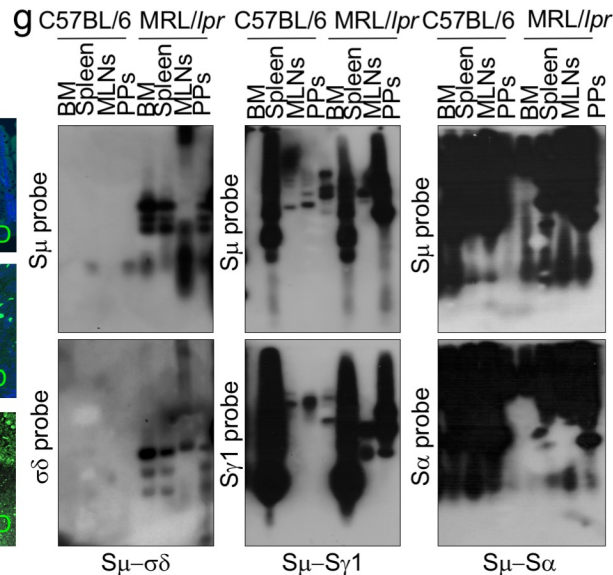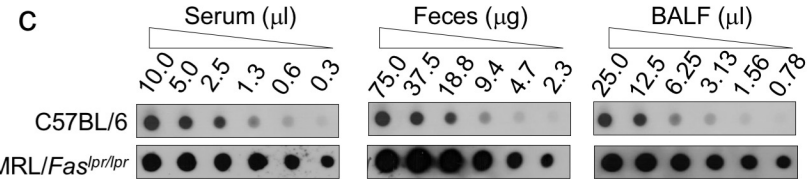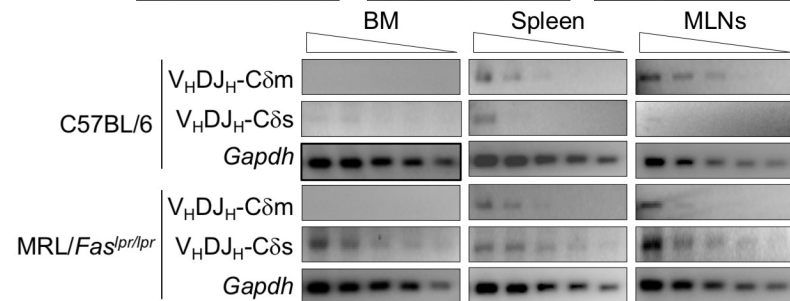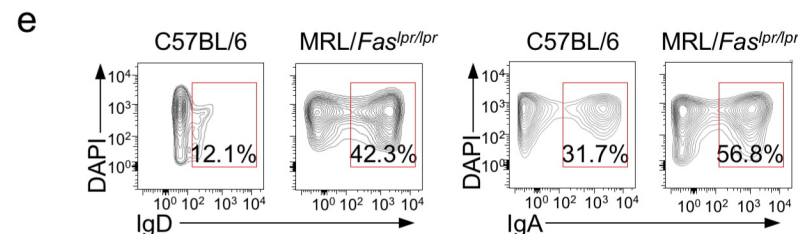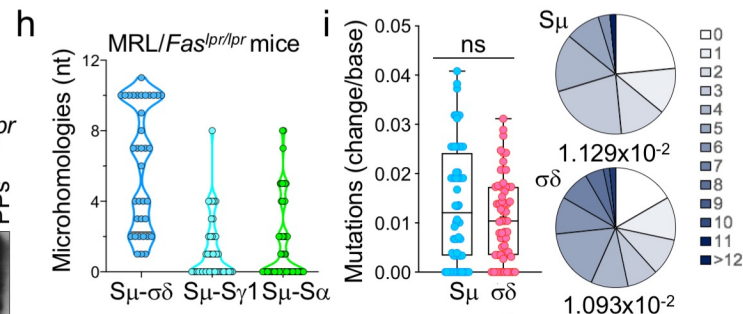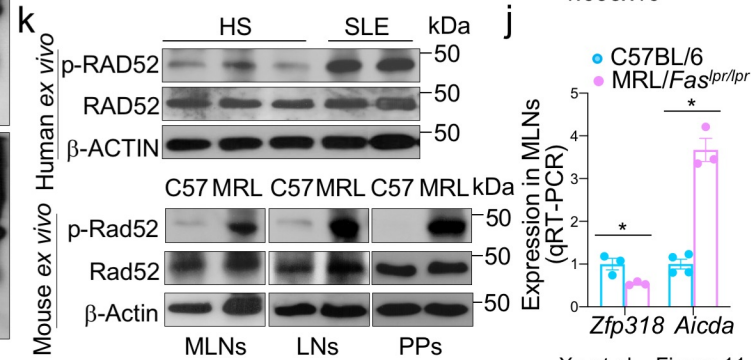



C57BL/6 mouse B cells (in vivo)

Intra-σδ

Σμ-σδ

Σμ-Sγ1

Σμ-Sα

Table with 4 columns: Intra-σδ, Σμ-σδ, Σμ-Sγ1, Σμ-Sα. Each column contains DNA sequence alignments with microhomologies in bold. Rows are numbered 1629 to 1902.

Extended Data Fig. 1 | Σμ-σδ and intra-σδ DNA recombination junctions in mouse spleen B cells contain high frequencies of microhomologies. The junctions of intra-σδ, Σμ-σδ, Σμ-Sγ1 and Σμ-Sα recombinant DNAs from spleen B cells of an OVA-immunized C57BL/6 mouse were amplified and sequenced using MiSeq system. Thirty-two representative junction sequences from each group are shown. Each intra-σδ recombinant DNA sequence (middle) is compared with the upstream (above) and the downstream (below) germline sd sequences. Each Σμ-σδ, Σμ-Sγ1 and Σμ-Sα recombinant DNA sequence (middle) is compared with the germline Σμ (above) and the σδ, Sγ1 or Sα (below) sequence. Microhomologies (bold) were determined by identifying the longest regions at the junctions of perfect uninterrupted donor/acceptor identity or the longest overlap region at the S-S junction with no more than one mismatch on either side of the breakpoint.











MRL/Fas<sup>pr/pr</sup> mouse B cells (in vivo)

Σμ-σδ

Σμ-Σγ1

Σμ-Σα

|                                                                                                                                                                                                                                                                                                                                                                                                                                                                                                                                                                                                                                                                                                                                                                                                                                                                                                                                                                                                                                                                                                                                                                                                                                                                                                                                                                                                                                                                                                                                                                                                                                                                                                                         |                                                                                                                                                                                                                                                                                                                                                                                                                                                                                                                                                                                                                                                                                                                                                                                                                                                                                                                                                                                                                                                                                                                                                                                                                                                                                                                                                                                                                                                                                                                                                                                                                                                                                                                         |                                                                                                                                                                                                                                                                                                                                                                                                                                                                                                                                                                                                                                                                                                                                                                                                                                                                                                                                                                                                                                                                                                                                                                                                                                                                                                                                                                                                                                                                                                                                                                                                                                                                                                                         |
|-------------------------------------------------------------------------------------------------------------------------------------------------------------------------------------------------------------------------------------------------------------------------------------------------------------------------------------------------------------------------------------------------------------------------------------------------------------------------------------------------------------------------------------------------------------------------------------------------------------------------------------------------------------------------------------------------------------------------------------------------------------------------------------------------------------------------------------------------------------------------------------------------------------------------------------------------------------------------------------------------------------------------------------------------------------------------------------------------------------------------------------------------------------------------------------------------------------------------------------------------------------------------------------------------------------------------------------------------------------------------------------------------------------------------------------------------------------------------------------------------------------------------------------------------------------------------------------------------------------------------------------------------------------------------------------------------------------------------|-------------------------------------------------------------------------------------------------------------------------------------------------------------------------------------------------------------------------------------------------------------------------------------------------------------------------------------------------------------------------------------------------------------------------------------------------------------------------------------------------------------------------------------------------------------------------------------------------------------------------------------------------------------------------------------------------------------------------------------------------------------------------------------------------------------------------------------------------------------------------------------------------------------------------------------------------------------------------------------------------------------------------------------------------------------------------------------------------------------------------------------------------------------------------------------------------------------------------------------------------------------------------------------------------------------------------------------------------------------------------------------------------------------------------------------------------------------------------------------------------------------------------------------------------------------------------------------------------------------------------------------------------------------------------------------------------------------------------|-------------------------------------------------------------------------------------------------------------------------------------------------------------------------------------------------------------------------------------------------------------------------------------------------------------------------------------------------------------------------------------------------------------------------------------------------------------------------------------------------------------------------------------------------------------------------------------------------------------------------------------------------------------------------------------------------------------------------------------------------------------------------------------------------------------------------------------------------------------------------------------------------------------------------------------------------------------------------------------------------------------------------------------------------------------------------------------------------------------------------------------------------------------------------------------------------------------------------------------------------------------------------------------------------------------------------------------------------------------------------------------------------------------------------------------------------------------------------------------------------------------------------------------------------------------------------------------------------------------------------------------------------------------------------------------------------------------------------|
| <p>588 590 591 592 593 594 595 596 597 598 599 600 601 602 603 604 605 606 607 608 609 610 611 612 613 614 615 616 617 618 619 620 621 622 623 624 625 626 627 628 629 630 631 632 633 634 635 636 637 638 639 640 641 642 643 644 645 646 647 648 649 650 651 652 653 654 655 656 657 658 659 660 661 662 663 664 665 666 667 668 669 670 671 672 673 674 675 676 677 678 679 680 681 682 683 684 685 686 687 688 689 690 691 692 693 694 695 696 697 698 699 700 701 702 703 704 705 706 707 708 709 710 711 712 713 714 715 716 717 718 719 720 721 722 723 724 725 726 727 728 729 730 731 732 733 734 735 736 737 738 739 740 741 742 743 744 745 746 747 748 749 750 751 752 753 754 755 756 757 758 759 760 761 762 763 764 765 766 767 768 769 770 771 772 773 774 775 776 777 778 779 780 781 782 783 784 785 786 787 788 789 790 791 792 793 794 795 796 797 798 799 800 801 802 803 804 805 806 807 808 809 810 811 812 813 814 815 816 817 818 819 820 821 822 823 824 825 826 827 828 829 830 831 832 833 834 835 836 837 838 839 840 841 842 843 844 845 846 847 848 849 850 851 852 853 854 855 856 857 858 859 860 861 862 863 864 865 866 867 868 869 870 871 872 873 874 875 876 877 878 879 880 881 882 883 884 885 886 887 888 889 890 891 892 893 894 895 896 897 898 899 900 901 902 903 904 905 906 907 908 909 910 911 912 913 914 915 916 917 918 919 920 921 922 923 924 925 926 927 928 929 930 931 932 933 934 935 936 937 938 939 940 941 942 943 944 945 946 947 948 949 950 951 952 953 954 955 956 957 958 959 960 961 962 963 964 965 966 967 968 969 970 971 972 973 974 975 976 977 978 979 980 981 982 983 984 985 986 987 988 989 990 991 992 993 994 995 996 997 998 999 1000</p> | <p>588 590 591 592 593 594 595 596 597 598 599 600 601 602 603 604 605 606 607 608 609 610 611 612 613 614 615 616 617 618 619 620 621 622 623 624 625 626 627 628 629 630 631 632 633 634 635 636 637 638 639 640 641 642 643 644 645 646 647 648 649 650 651 652 653 654 655 656 657 658 659 660 661 662 663 664 665 666 667 668 669 670 671 672 673 674 675 676 677 678 679 680 681 682 683 684 685 686 687 688 689 690 691 692 693 694 695 696 697 698 699 700 701 702 703 704 705 706 707 708 709 710 711 712 713 714 715 716 717 718 719 720 721 722 723 724 725 726 727 728 729 730 731 732 733 734 735 736 737 738 739 740 741 742 743 744 745 746 747 748 749 750 751 752 753 754 755 756 757 758 759 760 761 762 763 764 765 766 767 768 769 770 771 772 773 774 775 776 777 778 779 780 781 782 783 784 785 786 787 788 789 790 791 792 793 794 795 796 797 798 799 800 801 802 803 804 805 806 807 808 809 810 811 812 813 814 815 816 817 818 819 820 821 822 823 824 825 826 827 828 829 830 831 832 833 834 835 836 837 838 839 840 841 842 843 844 845 846 847 848 849 850 851 852 853 854 855 856 857 858 859 860 861 862 863 864 865 866 867 868 869 870 871 872 873 874 875 876 877 878 879 880 881 882 883 884 885 886 887 888 889 890 891 892 893 894 895 896 897 898 899 900 901 902 903 904 905 906 907 908 909 910 911 912 913 914 915 916 917 918 919 920 921 922 923 924 925 926 927 928 929 930 931 932 933 934 935 936 937 938 939 940 941 942 943 944 945 946 947 948 949 950 951 952 953 954 955 956 957 958 959 960 961 962 963 964 965 966 967 968 969 970 971 972 973 974 975 976 977 978 979 980 981 982 983 984 985 986 987 988 989 990 991 992 993 994 995 996 997 998 999 1000</p> | <p>588 590 591 592 593 594 595 596 597 598 599 600 601 602 603 604 605 606 607 608 609 610 611 612 613 614 615 616 617 618 619 620 621 622 623 624 625 626 627 628 629 630 631 632 633 634 635 636 637 638 639 640 641 642 643 644 645 646 647 648 649 650 651 652 653 654 655 656 657 658 659 660 661 662 663 664 665 666 667 668 669 670 671 672 673 674 675 676 677 678 679 680 681 682 683 684 685 686 687 688 689 690 691 692 693 694 695 696 697 698 699 700 701 702 703 704 705 706 707 708 709 710 711 712 713 714 715 716 717 718 719 720 721 722 723 724 725 726 727 728 729 730 731 732 733 734 735 736 737 738 739 740 741 742 743 744 745 746 747 748 749 750 751 752 753 754 755 756 757 758 759 760 761 762 763 764 765 766 767 768 769 770 771 772 773 774 775 776 777 778 779 780 781 782 783 784 785 786 787 788 789 790 791 792 793 794 795 796 797 798 799 800 801 802 803 804 805 806 807 808 809 810 811 812 813 814 815 816 817 818 819 820 821 822 823 824 825 826 827 828 829 830 831 832 833 834 835 836 837 838 839 840 841 842 843 844 845 846 847 848 849 850 851 852 853 854 855 856 857 858 859 860 861 862 863 864 865 866 867 868 869 870 871 872 873 874 875 876 877 878 879 880 881 882 883 884 885 886 887 888 889 890 891 892 893 894 895 896 897 898 899 900 901 902 903 904 905 906 907 908 909 910 911 912 913 914 915 916 917 918 919 920 921 922 923 924 925 926 927 928 929 930 931 932 933 934 935 936 937 938 939 940 941 942 943 944 945 946 947 948 949 950 951 952 953 954 955 956 957 958 959 960 961 962 963 964 965 966 967 968 969 970 971 972 973 974 975 976 977 978 979 980 981 982 983 984 985 986 987 988 989 990 991 992 993 994 995 996 997 998 999 1000</p> |
|-------------------------------------------------------------------------------------------------------------------------------------------------------------------------------------------------------------------------------------------------------------------------------------------------------------------------------------------------------------------------------------------------------------------------------------------------------------------------------------------------------------------------------------------------------------------------------------------------------------------------------------------------------------------------------------------------------------------------------------------------------------------------------------------------------------------------------------------------------------------------------------------------------------------------------------------------------------------------------------------------------------------------------------------------------------------------------------------------------------------------------------------------------------------------------------------------------------------------------------------------------------------------------------------------------------------------------------------------------------------------------------------------------------------------------------------------------------------------------------------------------------------------------------------------------------------------------------------------------------------------------------------------------------------------------------------------------------------------|-------------------------------------------------------------------------------------------------------------------------------------------------------------------------------------------------------------------------------------------------------------------------------------------------------------------------------------------------------------------------------------------------------------------------------------------------------------------------------------------------------------------------------------------------------------------------------------------------------------------------------------------------------------------------------------------------------------------------------------------------------------------------------------------------------------------------------------------------------------------------------------------------------------------------------------------------------------------------------------------------------------------------------------------------------------------------------------------------------------------------------------------------------------------------------------------------------------------------------------------------------------------------------------------------------------------------------------------------------------------------------------------------------------------------------------------------------------------------------------------------------------------------------------------------------------------------------------------------------------------------------------------------------------------------------------------------------------------------|-------------------------------------------------------------------------------------------------------------------------------------------------------------------------------------------------------------------------------------------------------------------------------------------------------------------------------------------------------------------------------------------------------------------------------------------------------------------------------------------------------------------------------------------------------------------------------------------------------------------------------------------------------------------------------------------------------------------------------------------------------------------------------------------------------------------------------------------------------------------------------------------------------------------------------------------------------------------------------------------------------------------------------------------------------------------------------------------------------------------------------------------------------------------------------------------------------------------------------------------------------------------------------------------------------------------------------------------------------------------------------------------------------------------------------------------------------------------------------------------------------------------------------------------------------------------------------------------------------------------------------------------------------------------------------------------------------------------------|

**Extended Data Fig. 6 | Increased CSR to IgD associates with high frequency of microhomologies in recombined Σμ-σδ, Σμ-Σγ1 and Σμ-Σα DNA junctions in autoimmune mice.** The junctions of Σμ-σδ, Σμ-Σγ1 and Σμ-Σα recombinant DNAs from spleen B cells of MRL/Fas<sup>pr/pr</sup> mice were amplified and sequenced by MiSeq. Thirty-two representative sequences from Σμ-σδ, Σμ-Σγ1 and Σμ-Σα junctions are shown. Each recombinant DNA sequence (middle) is compared with the germline Σμ (above, blue) and σδ, Σγ1 or Σα (below, red) sequences. Microhomologies (bold) were determined by identifying the longest region at the Σμ-σδ, Σμ-Σγ1 or Σμ-Σα junction of perfect uninterrupted donor/acceptor identity or the longest overlap region at the S-S junction with no more than one mismatch on either side of the breakpoint.

CSR to IgD or IgG3: DSBs resolved by Rad52 or KU70/Ku86 binding to DSB ends

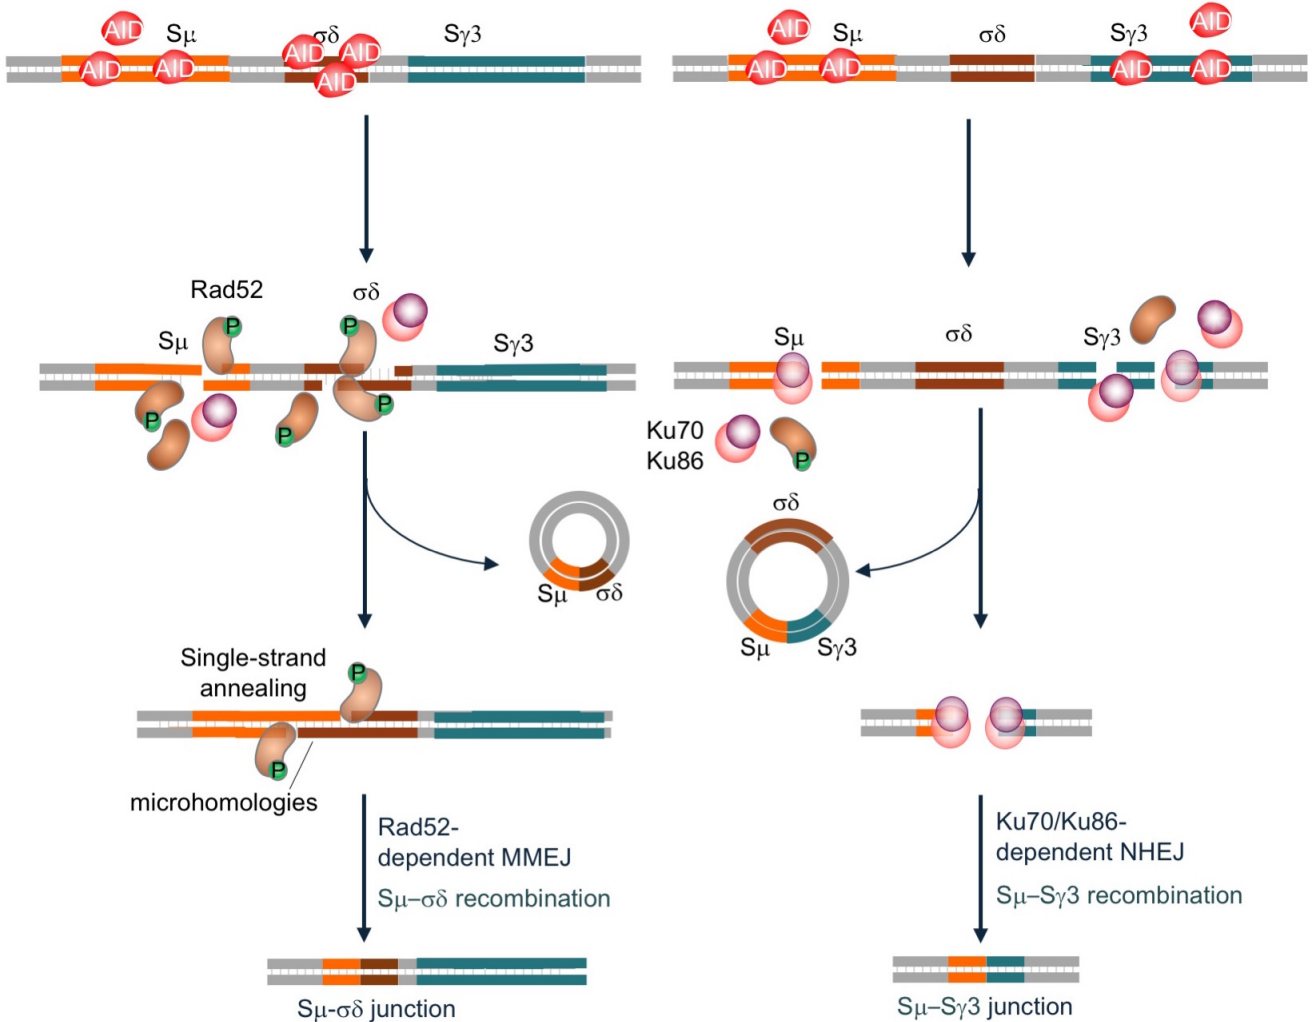

**Extended Data Fig. 7 | Rad52 mediates Sμ-σδ DNA recombination (CSR to IgD).** CSR is initiated by AID-mediated generation of multiple DSBs in the targeted upstream Sμ and downstream Sγ3 (shown here), Sα or Sε regions. Ku70/Ku86, a core NHEJ factor, binds to blunt DSB ends to synapse DSBs by NHEJ involving synapsis and long-range end-joining of S region DSBs, leading to inter-S-S region recombination. This entails deletion of the intervening sequence between S regions as an extrachromosomal circle and leads to CSR to IgG, IgA and IgE. Rad52, an HR element, which is phosphorylated upon CSR induction, binds preferentially to resected DSB single-strand overhangs and facilitates a (Ku70/Ku86-independent) microhomology-mediated A-EJ, which favors intra-S region recombination but can also mediate, particularly in the absence of the NHEJ pathway, inter-S-S CSR. In CSR to IgD, which involves short-range Sμ-σδ recombination. B cells recruit the CSR machinery, including AID, to constitutively transcribed Sμ and σδ regions, and introduce DSBs into these regions. These DSB ends undergo abundant resection, yielding single-strand DNA overhangs. Upstream Sμ and downstream σδ DSB complementary overhangs are rejoined by Rad52 through MMEJ; Upstream Sμ and downstream Sγ3 DSB blunt ends are rejoined by Ku70/Ku86 through NHEJ.



### Supplemental Table 1. Primers used for this study.

|                                                          | Forward primer                  | Reverse primer                  |
|----------------------------------------------------------|---------------------------------|---------------------------------|
| <u>Human and mouse genes</u>                             |                                 |                                 |
| <u>Human</u>                                             |                                 |                                 |
| <i>ZFP318</i>                                            | 5'-CCTGGGGAATCTGGGGGATA-3'      | 5'-GCGGGATCGGAGGAATTACA-3'      |
| <i>RAD52</i>                                             | 5'-GTAGGGAGAGGCTCTGGACA-3'      | 5'-GCAGGTGCTTAGGACCAAGT-3'      |
| <i>KU70</i>                                              | 5'-GAAGCAAAGGCCCAAGGTG-3'       | 5'-AGCAGCTCCTGCTTCTTCAG-3'      |
| <i>KU86</i>                                              | 5'-GCAGTGTACCTCTGTTGGA-3'       | 5'-GCTCGGATGCAGTCTATGCT-3'      |
| <i>AICDA</i>                                             | 5'-GTCACCTGGTTCACCTCCTG-3'      | 5'-CTTGCGGTCCTCACAGAAGT-3'      |
| <i>β-ACTIN</i>                                           | 5'-AGAGCTACGAGCTGCCTGAC-3'      | 5'-AGCACTGTGTTGGCGTACAG-3'      |
| <u>Mouse</u>                                             |                                 |                                 |
| <i>Zfp318</i>                                            | 5'-CGTAGTCGTCCCAATCTCCG-3'      | 5'-TGGAATGGACACCCGAACAG-3'      |
| <i>Rad52</i>                                             | 5'-CATTGGGACTCCCCAAACCA-3'      | 5'-GCGAGTCTCCATCTGTTCCC-3'      |
| <i>Ku70</i>                                              | 5'-CACCAAGCGGTCTCTGACTT-3'      | 5'-AGAGAGGGCCTCAGGTAGTG-3'      |
| <i>Ku86</i>                                              | 5'-AGGCCAGGAAGCTCTATCA-3'       | 5'-GCACTCTTGATTCCCCACA-3'       |
| <i>Aicda</i>                                             | 5'-AGAAAGTCACGCTGGAGACC-3'      | 5'-CTCCTCTTCACCACGTAGCA-3'      |
| <i>β-Actin</i>                                           | 5'-CTAAGGCCAACCGTAAAG-3'        | 5'-ACCAGAGGCATACAGGGACA-3'      |
| <u>Post-recombination transcripts</u>                    |                                 |                                 |
| <u>Mouse</u>                                             |                                 |                                 |
| I $\mu$ -C $\mu$                                         | 5'-ACCTGGGAATGTATGGTTGTGGCTT-3' | 5'-GAAATGGTGCTGGGCAGGAA-3'      |
| I $\mu$ -C $\delta$                                      | 5'-ACCTGGGAATGTATGGTTGTGGCTT-3' | 5'-GCACTCTGAGAGGAGGAACA-3'      |
| I $\mu$ -C $\gamma$ 1                                    | 5'-ACCTGGGAATGTATGGTTGTGGCTT-3' | 5'-ATGGAGTTAGTTTGGGCAGCA-3'     |
| I $\mu$ -C $\alpha$                                      | 5'-ACCTGGGAATGTATGGTTGTGGCTT-3' | 5'-TAATCGTGAATCAGGCAG-3'        |
| I $\mu$ -C $\epsilon$                                    | 5'-ACCTGGGAATGTATGGTTGTGGCTT-3' | 5'-ACAGGGCTTCAAGGGGTAGA-3'      |
| <u>Secreted and transmembrane forms of IgM and IgD</u>   |                                 |                                 |
| <u>Human</u>                                             |                                 |                                 |
| <i>V<sub>H</sub>DJ<sub>H</sub>-C<math>\mu</math>m</i>    | 5'-GACACGGCYGTRTATTACTGTGCG-3'  | 5'-AGAGGCTCAGGAGGAAGAGG-3'      |
| <i>V<sub>H</sub>DJ<sub>H</sub>-C<math>\mu</math>s</i>    | 5'-GACACGGCYGTRTATTACTGTGCG-3'  | 5'-CTGTGTCGGACATGACCAGG-3'      |
| <i>V<sub>H</sub>DJ<sub>H</sub>-C<math>\delta</math>m</i> | 5'-GACACGGCYGTRTATTACTGTGCG-3'  | 5'-CCACAAACGTGGACAGGGT-3'       |
| <i>V<sub>H</sub>DJ<sub>H</sub>-C<math>\delta</math>s</i> | 5'-GACACGGCYGTRTATTACTGTGCG-3'  | 5'-CATGGGGCCATGGTCTGTTACA-3'    |
| <u>Mouse</u>                                             |                                 |                                 |
| <i>V<sub>H</sub>DJ<sub>H</sub>-C<math>\mu</math>m</i>    | 5'-GCCTGACATCTGAGGACTCTGC-3'    | 5'-GCCTTCCTCCTCAGCATTACCTC-3'   |
| <i>V<sub>H</sub>DJ<sub>H</sub>-C<math>\mu</math>s</i>    | 5'-GCCTGACATCTGAGGACTCTGC-3'    | 5'-CATGATCAGGGAGACATTGTACAG-3'  |
| <i>V<sub>H</sub>DJ<sub>H</sub>-C<math>\delta</math>m</i> | 5'-GCCTGACATCTGAGGACTCTGC-3'    | 5'-ACACGAGTGTGGATGGTGTGAC-3'    |
| <i>V<sub>H</sub>DJ<sub>H</sub>-C<math>\delta</math>s</i> | 5'-GCCTGACATCTGAGGACTCTGC-3'    | 5'-GGGCAGGACCATCAGGTTT-3'       |
| <u>S-S recombination</u>                                 |                                 |                                 |
| <u>Human</u>                                             |                                 |                                 |
| S $\mu$ - $\sigma$ $\delta$                              |                                 |                                 |
| First round                                              | 5'-TACCCTCCTTGGTGCAGA-3'        | 5'-CTGGCCAGCGGAAGATCTCCTTCTT-3' |
| Second round                                             | 5'-TGCTGCCACTTCTAGAGCAA-3'      | 5'-AGGGCTGTTATCCTTTGGGTG-3'     |
| S $\mu$ probe                                            | 5'-CCCCAGCCCTTGTAAATGGA-3'      | 5'-CCAGTGGGGCTTGGTATGTT-3'      |
| $\sigma$ $\delta$ probe                                  | 5'-ACCAAAGCCTCTGGAGGGAA-3'      | 5'-AGGGCTGTTATCCTTTGGGTG-3'     |
| S $\mu$ -S $\gamma$ 1                                    |                                 |                                 |
| First round                                              | 5'-TACCCTCCTTGGTGCAGA-3'        | 5'-AGTCAGCACAGTCCAGTGTCTCTAG-3' |
| Second round                                             | 5'-TGCTGCCACTTCTAGAGCAA-3'      | 5'-CATCGGTGCCACCTCAGGGACGCT-3'  |

|                         |                             |                              |
|-------------------------|-----------------------------|------------------------------|
| $S\mu$ probe            | 5'-CCCCAGCCCTTGTTAATGGA-3'  | 5'-CCAGTGGGGCTTGGTATGTT-3'   |
| $S\gamma 1$ probe       | 5'-CACTGGGGCTAAGGGGAAAG-3'  | 5'-GCCCCACTCCAGCCTTTTAT-3'   |
| $S\mu$ - $S\alpha 1$    |                             |                              |
| First round             | 5'-TACCCTCCTCTTGGTGCAGA-3'  | 5'-CTTTCGCTCCAGGTCACACT-3'   |
| Second round            | 5'-TGCTGCCACTTCTAGAGCAA-3'  | 5'-TACTGGAGGAACCCAGCACA-3'   |
| $S\mu$ probe            | 5'-CCCCAGCCCTTGTTAATGGA-3'  | 5'-CCAGTGGGGCTTGGTATGTT-3'   |
| $S\alpha 1$ probe       | 5'-CTCTCTGTGCTGGGTTCCCTC-3' | 5'-TGTAGTGCTTCACGTGGCAT-3'   |
| <u>Mouse</u>            |                             |                              |
| $S\mu$ - $\sigma\delta$ |                             |                              |
| First round             | 5'-GGGCTTCTAAGCCAGTCCAC-3'  | 5'-CCAATTACTAAACAGCCCAGGT-3' |
| Second round            | 5'-CTCTGGCCCTGCTTATTGTTG-3' | 5'-CAGCCCAGGTTTATCTTTTCA-3'  |
| $S\mu$ probe            | 5'-CTGGGAATGTATGGTTGTGGC-3' | 5'-TGACCCAGACAACGGTACTC-3'   |
| $\sigma\delta$ probe    | 5'-CCCAGAACCTGAGAAGGAAG-3'  | 5'-CAGCCCAGGTTTATCTTTTCA-3'  |
| $S\mu$ - $S\gamma 1$    |                             |                              |
| First round             | 5'-GGGCTTCTAAGCCAGTCCAC-3'  | 5'-GGACAGGACAGGACCAAACC-3'   |
| Second round            | 5'-CTCTGGCCCTGCTTATTGTTG-3' | 5'-TAGAAGGCCGCTCTTTTGCA-3'   |
| $S\mu$ probe            | 5'-CTGGGAATGTATGGTTGTGGC-3' | 5'-TGACCCAGACAACGGTACTC-3'   |
| $S\gamma 1$ probe       | 5'-GTGCCGACTTCAATGTGCTT-3'  | 5'-CCCATGTCCCCGACTCTCTA-3'   |
| $S\mu$ - $S\gamma 3$    |                             |                              |
| First round             | 5'-GGGCTTCTAAGCCAGTCCAC-3'  | 5'-CTTTGACAAGGCATCCCAGTGT-3' |
| Second round            | 5'-CTCTGGCCCTGCTTATTGTTG-3' | 5'-ACCAAGGGATAGACAGATGGGG-3' |
| $S\mu$ probe            | 5'-CTGGGAATGTATGGTTGTGGC-3' | 5'-TGACCCAGACAACGGTACTC-3'   |
| $S\gamma 3$ probe       | 5'-AAGCACAGGTGCAAGAGACT-3'  | 5'-ACCAAGGGATAGACAGATGGGG-3' |
| $S\mu$ - $S\alpha$      |                             |                              |
| First round             | 5'-GGGCTTCTAAGCCAGTCCAC-3'  | 5'-CATCCAATTCTTGGACGGCG-3'   |
| Second round            | 5'-CTCTGGCCCTGCTTATTGTTG-3' | 5'-CGGCGTTAGAGTCATGTTGC-3'   |
| $S\mu$ probe            | 5'-CTGGGAATGTATGGTTGTGGC-3' | 5'-TGACCCAGACAACGGTACTC-3'   |
| $S\alpha$ probe         | 5'-ACCCAGTGATAATCGGCTGC-3'  | 5'-CGGCGTTAGAGTCATGTTGC-3'   |
| $S\mu$ - $S\epsilon$    |                             |                              |
| First round             | 5'-GGGCTTCTAAGCCAGTCCAC-3'  | 5'-TCCACATGCCCAGGACATTC-3'   |
| Second round            | 5'-CTCTGGCCCTGCTTATTGTTG-3' | 5'-TTCTCCTGAGAGAGGGGCTC-3'   |
| $S\mu$ probe            | 5'-CTGGGAATGTATGGTTGTGGC-3' | 5'-TGACCCAGACAACGGTACTC-3'   |
| $S\epsilon$ probe       | 5'-GGTGGGGTTGAGCTGAATGA-3'  | 5'-ATTCTGCTAGGCCCGATTG-3'    |
| <u>ChIP Assays</u>      |                             |                              |
| Mouse $S\mu$            | 5'-ACCGCAAATGGTAAGCCAGA-3'  | 5'-TGTGAGTGACCCAGACAACG-3'   |
| Mouse $\sigma\delta$    | 5'-ATGCCAACCTGATTCAGCA-3'   | 5'-AGGCTAGGAGTCTGGGCTAC-3'   |
| Mouse $S\gamma 1$       | 5'-AACCACAGAAGAGCAGGAGC-3'  | 5'-TACCCCGTACTCTCACCTGG-3'   |
| Mouse $S\gamma 3$       | 5'-AGGGGACCTGGATAAGCCAT-3'  | 5'-CCCCACTATGGTTGCTTGGT-3'   |
| Mouse $S\alpha$         | 5'-CTGGGCTGGACTCAGTTGAC-3'  | 5'-AGTCCAGTCATGCTAATTCACC-3' |
